# Supplementary material for: The risk of nontuberculous mycobacterial infection in patients with Sjögren’s syndrome: a nationwide, population-based cohort study
Source: BMC Infect Dis. 2017 Dec 28;17:796. doi: 10.1186/s12879-017-2930-7 (PMC5745909; doi:10.1186/s12879-017-2930-7)
Supplement: Supplementary file 1 — Unadjusted and adjusted hazard ratios for the association between variable and the risk of NTM infection after the diagnosis. (XLSX 9945 kb) [file 12879_2017_2930_MOESM1_ESM.xlsx]

## Sheet: SS_NTM_cohor1_dID
age category	SEX	SS	CCIS	CCISg	state	nNTM	SS_NTM	MTX	Azathioprin	Cyclophosphamide	IMs	Pd_dose	Steroid	ssIMs	SS_NTM1	nNTM1	MTX_1	Azathioprin_1	Cyclophosphamide_1	IMs1	Pd_dose1	Steroid_1	ssIMs1
0	0	1	0	0	9	0	3.33151	0	0	0	0	1	1	1	1	0	0	0	0	0	0	0	1
0	0	1	0	0	30	0	1.36986	0	0	0	0	0	0	1	1	0	0	0	0	0	0	0	1
0	0	1	0	0	44	0	2.04384	0	0	0	0	0	0	1	1	0	0	0	0	0	0	0	1
0	0	1	0	0	50	0	5.7726	0	0	0	0	498.096	1	1	1	0	0	0	0	0	0	0	1
0	0	1	0	0	52	0	0.210959	0	0	0	0	0	0	1	0.210959	0	0	0	0	0	0	0	1
0	0	1	0	0	60	0	0.783562	0	0	0	0	0	0	1	0.783562	0	0	0	0	0	0	0	1
0	0	1	0	0	72	0	4.24658	0	0	0	0	0	0	1	1	0	0	0	0	0	0	0	1
0	0	1	0	0	76	0	2.66575	0	0	0	0	0	0	1	1	0	0	0	0	0	0	0	1
0	0	1	0	0	78	0	1.32055	0	0	0	0	0	0	1	1	0	0	0	0	0	0	0	1
0	0	1	0	0	89	0	0.630137	0	0	0	0	0	0	1	0.630137	0	0	0	0	0	0	0	1
0	0	1	0	0	91	0	2.79726	0	0	0	0	15	1	1	1	0	0	0	0	0	0	0	1
0	0	1	0	0	99	0	5.81918	0	0	0	0	10	1	1	1	0	0	0	0	0	0	0	1
0	0	1	0	0	106	0	2.11781	0	0	0	0	0	0	1	1	0	0	0	0	0	0	0	1
0	0	1	0	0	108	0	1.79726	0	0	0	0	0	0	1	1	0	0	0	0	0	0	0	1
0	0	1	0	0	125	0	4.16986	0	0	0	0	0	0	1	1	0	0	0	0	0	0	0	1
0	0	1	0	0	130	0	5.48219	1	0	0	1	0	0	2	1	0	0	0	0	0	0	0	1
0	0	1	0	0	144	0	5.33973	0	0	0	0	19.4444	1	1	1	0	0	0	0	0	0	0	1
0	0	1	0	0	151	0	0.665753	0	0	0	0	0	0	1	0.665753	0	0	0	0	0	0	0	1
0	0	1	0	0	157	0	0.432877	0	0	0	0	0	0	1	0.432877	0	0	0	0	0	0	0	1
0	0	1	0	0	162	0	5.49315	0	1	0	1	0	0	2	1	0	0	0	0	0	0	0	1
0	0	1	0	0	166	0	4.73425	0	0	0	0	0	0	1	1	0	0	0	0	0	0	0	1
0	0	1	0	0	167	0	5.34521	0	0	0	0	7.5	1	1	1	0	0	0	0	0	0	0	1
0	0	1	0	0	173	0	0.208219	0	0	0	0	0	0	1	0.208219	0	0	0	0	0	0	0	1
0	0	1	0	0	183	0	0.410959	0	0	0	0	0	0	1	0.410959	0	0	0	0	0	0	0	1
0	0	1	0	0	184	0	2.27397	0	0	0	0	0	0	1	1	0	0	0	0	0	0	0	1
0	0	1	0	0	192	0	5.12877	0	0	0	0	0	0	1	1	0	0	0	0	0	0	0	1
0	0	1	0	0	193	0	2.38904	0	0	0	0	0	0	1	1	0	0	0	0	0	0	0	1
0	0	1	0	0	206	0	5.49863	0	0	0	0	10	1	1	1	0	0	0	0	0	0	0	1
0	0	1	0	0	213	0	0.210959	0	0	0	0	0	0	1	0.210959	0	0	0	0	0	0	0	1
0	0	1	0	0	220	0	0.364384	0	0	0	0	0	0	1	0.364384	0	0	0	0	0	0	0	1
0	0	1	0	0	223	0	0.60274	0	0	0	0	0	0	1	0.60274	0	0	0	0	0	0	0	1
0	0	1	0	0	231	0	0.747945	0	0	0	0	0	0	1	0.747945	0	0	0	0	0	0	0	1
0	0	1	0	0	234	0	5.50411	0	0	0	0	57.5	1	1	1	0	0	0	0	0	0	0	1
0	0	1	0	0	245	0	5.24384	0	0	0	0	0	0	1	1	0	0	0	0	0	0	0	1
0	0	1	0	0	247	0	4.00548	0	0	0	0	15.625	1	1	1	0	0	0	0	0	0	0	1
0	0	1	0	0	255	0	5.16986	0	0	0	0	0	0	1	1	0	0	0	0	0	0	0	1
0	0	1	0	0	260	0	1.12603	0	0	0	0	0	0	1	1	0	0	0	0	0	0	0	1
0	0	1	0	0	309	0	1.93425	0	0	0	0	0	0	1	1	0	0	0	0	0	0	0	1
0	0	1	0	0	312	0	5.33973	0	0	0	0	15	1	1	1	0	0	0	0	0	0	0	1
0	0	1	0	0	315	0	5.10959	0	0	0	0	29.4398	1	1	1	0	0	0	0	0	0	0	1
0	0	1	0	0	324	0	0.723288	0	0	0	0	0	0	1	0.723288	0	0	0	0	0	0	0	1
0	0	1	0	0	325	0	2.12329	0	0	0	0	0	0	1	1	0	0	0	0	0	0	0	1
0	0	1	0	0	328	0	2.55068	0	0	0	0	33.8824	1	1	1	0	0	0	0	0	0	0	1
0	0	1	0	0	330	0	5.05205	0	0	0	0	0	0	1	1	0	0	0	0	0	0	0	1
0	0	1	0	0	335	0	2.81918	0	0	0	0	20	1	1	1	0	0	0	0	0	0	0	1
0	0	1	0	0	343	0	2.22466	0	0	0	0	0	0	1	1	0	0	0	0	0	0	0	1
0	0	1	0	0	356	0	4.07945	1	0	0	1	64.7807	1	2	1	0	0	0	0	0	0	0	1
0	0	1	0	0	361	0	4.19178	0	0	0	0	0	0	1	1	0	0	0	0	0	0	0	1
0	0	1	0	0	364	0	0.605479	0	0	0	0	0	0	1	0.605479	0	0	0	0	0	0	0	1
0	0	1	0	0	368	0	3.33151	0	0	0	0	0	0	1	1	0	0	0	0	0	0	0	1
0	0	1	0	0	374	0	2.16438	0	0	0	0	5	1	1	1	0	0	0	0	0	0	0	1
0	0	1	0	0	384	0	0.893151	0	0	0	0	0	0	1	0.893151	0	0	0	0	0	0	0	1
0	0	1	0	0	388	0	0.090411	0	0	0	0	0	0	1	0.090411	0	0	0	0	0	0	0	1
0	0	1	0	0	395	0	1.70685	0	1	0	1	0	0	2	1	0	0	0	0	0	0	0	1
0	0	1	0	0	403	0	3.94795	0	0	0	0	0	0	1	1	0	0	0	0	0	0	0	1
0	0	1	0	0	406	0	5.47945	0	0	0	0	25	1	1	1	0	0	0	0	0	0	0	1
0	0	1	0	0	421	0	5.63288	0	0	0	0	0	0	1	1	0	0	0	0	0	0	0	1
0	0	1	0	0	423	0	0.210959	0	0	0	0	0	0	1	0.210959	0	0	0	0	0	0	0	1
0	0	1	0	0	433	0	5.08219	0	0	0	0	6.25	1	1	1	0	0	0	0	0	0	0	1
0	0	1	0	0	443	0	0.589041	0	0	0	0	0	0	1	0.589041	0	0	0	0	0	0	0	1
0	0	1	0	0	449	0	4.36164	0	0	0	0	22.0714	1	1	1	0	0	0	0	0	0	0	1
0	0	1	0	0	463	0	4.8274	0	0	0	0	35	1	1	1	0	0	0	0	0	0	0	1
0	0	1	0	0	476	0	3.15342	0	0	0	0	5	1	1	1	0	0	0	0	0	0	0	1
0	0	1	0	0	481	0	3.66301	0	0	0	0	11.2563	1	1	1	0	0	0	0	0	0	0	1
0	0	1	0	0	500	0	0.531507	0	0	0	0	0	0	1	0.531507	0	0	0	0	0	0	0	1
0	0	1	0	0	506	0	5.47123	0	0	0	0	7.5	1	1	1	0	0	0	0	0	0	0	1
0	0	1	0	0	523	0	0.676712	0	0	0	0	0	0	1	0.676712	0	0	0	0	0	0	0	1
0	0	1	0	0	525	0	5.45753	0	0	0	0	32.5	1	1	1	0	0	0	0	0	0	0	1
0	0	1	0	0	533	0	2.01096	0	0	0	0	0	0	1	1	0	0	0	0	0	0	0	1
0	0	1	0	0	538	0	1.5863	0	0	0	0	0	0	1	1	0	0	0	0	0	0	0	1
0	0	1	0	0	541	0	1.53973	0	0	0	0	0	0	1	1	0	0	0	0	0	0	0	1
0	0	1	0	0	549	0	3.23836	0	0	0	0	16.3961	1	1	1	0	0	0	0	0	0	0	1
0	0	1	0	0	555	0	0.843836	0	0	0	0	0	0	1	0.843836	0	0	0	0	0	0	0	1
0	0	1	0	0	563	0	5.70959	1	0	0	1	3.03708	1	2	1	0	0	0	0	0	0	0	1
0	0	1	0	0	569	0	3.52877	0	0	0	0	0	0	1	1	0	0	0	0	0	0	0	1
0	0	1	0	0	596	0	1.0137	0	0	0	0	0	0	1	1	0	0	0	0	0	0	0	1
0	0	1	0	0	606	0	2.23562	0	0	0	0	0	0	1	1	0	0	0	0	0	0	0	1
0	0	1	0	0	608	0	0.158904	0	0	0	0	0	0	1	0.158904	0	0	0	0	0	0	0	1
0	0	1	0	0	616	0	5.63836	1	0	0	1	0	0	2	1	0	0	0	0	0	0	0	1
0	0	1	0	0	626	0	2.52055	0	0	0	0	0	0	1	1	0	0	0	0	0	0	0	1
0	0	1	0	0	635	0	3.04932	0	0	0	0	20	1	1	1	0	0	0	0	0	0	0	1
0	0	1	0	0	644	0	0.676712	0	0	0	0	0	0	1	0.676712	0	0	0	0	0	0	0	1
0	0	1	0	0	645	0	4.4274	0	0	0	0	0	0	1	1	0	0	0	0	0	0	0	1
0	0	1	0	0	664	0	1.4	0	0	0	0	0	0	1	1	0	0	0	0	0	0	0	1
0	0	1	0	0	666	0	5.41918	0	0	0	0	10	1	1	1	0	0	0	0	0	0	0	1
0	0	1	0	0	667	0	2.1863	0	0	0	0	0	0	1	1	0	0	0	0	0	0	0	1
0	0	1	0	0	673	0	3.50685	0	0	0	0	35.7143	1	1	1	0	0	0	0	0	0	0	1
0	0	1	0	0	674	0	0.764384	0	0	0	0	0	0	1	0.764384	0	0	0	0	0	0	0	1
0	0	1	0	0	703	0	3.27945	0	0	0	0	2.14286	1	1	1	0	0	0	0	0	0	0	1
0	0	1	0	0	709	0	5.72603	0	0	0	0	10.4839	1	1	1	0	0	0	0	0	0	0	1
0	0	1	0	0	723	0	4.32603	0	0	0	0	0	0	1	1	0	0	0	0	0	0	0	1
0	0	1	0	0	740	0	5.14795	0	1	0	1	3.23789	1	2	1	0	0	0	0	0	0	0	1
0	0	1	0	0	741	0	0.821918	0	0	0	0	0	0	1	0.821918	0	0	0	0	0	0	0	1
0	0	1	0	0	750	0	0.336986	0	0	0	0	0	0	1	0.336986	0	0	0	0	0	0	0	1
0	0	1	0	0	765	0	3.4274	0	0	0	0	4.32203	1	1	1	0	0	0	0	0	0	0	1
0	0	1	0	0	775	0	0.89589	0	0	0	0	0	0	1	0.89589	0	0	0	0	0	0	0	1
0	0	1	0	0	783	0	0.123288	0	0	0	0	0	0	1	0.123288	0	0	0	0	0	0	0	1
0	0	1	0	0	787	0	3.46575	0	0	0	0	0	0	1	1	0	0	0	0	0	0	0	1
0	0	1	0	0	794	0	3.93699	1	0	0	1	5	1	2	1	0	0	0	0	0	0	0	1
0	0	1	0	0	796	0	0.257534	0	0	0	0	0	0	1	0.257534	0	0	0	0	0	0	0	1
0	0	1	0	0	800	0	5.93973	0	0	0	0	11.0105	1	1	1	0	0	0	0	0	0	0	1
0	0	1	0	0	806	0	2.09041	0	0	0	0	0	0	1	1	0	0	0	0	0	0	0	1
0	0	1	0	0	837	0	3.80548	0	0	0	0	0	0	1	1	0	0	0	0	0	0	0	1
0	0	1	0	0	839	0	5.20822	0	0	0	0	15.8333	1	1	1	0	0	0	0	0	0	0	1
0	0	1	0	0	846	0	4.79178	0	0	0	0	8.68421	1	1	1	0	0	0	0	0	0	0	1
0	0	1	0	0	849	0	1.07123	0	0	0	0	0	0	1	1	0	0	0	0	0	0	0	1
0	0	1	0	0	855	0	5.01918	0	0	0	0	5	1	1	1	0	0	0	0	0	0	0	1
0	0	1	0	0	858	0	0.0739726	0	0	0	0	0	0	1	0.0739726	0	0	0	0	0	0	0	1
0	0	1	0	0	865	0	4.25205	0	0	0	0	15	1	1	1	0	0	0	0	0	0	0	1
0	0	1	0	0	873	0	1.12877	0	0	0	0	0	0	1	1	0	0	0	0	0	0	0	1
0	0	1	0	0	874	0	2.50137	0	0	0	0	40	1	1	1	0	0	0	0	0	0	0	1
0	0	1	0	0	886	0	3.77808	0	0	0	0	0	0	1	1	0	0	0	0	0	0	0	1
0	0	1	0	0	891	0	0.534247	0	0	0	0	0	0	1	0.534247	0	0	0	0	0	0	0	1
0	0	1	0	0	893	0	1.89315	0	0	0	0	0	0	1	1	0	0	0	0	0	0	0	1
0	0	1	0	0	900	0	4.01918	0	0	0	0	0	0	1	1	0	0	0	0	0	0	0	1
0	0	1	0	0	913	0	1.66849	0	0	0	0	0	0	1	1	0	0	0	0	0	0	0	1
0	0	1	0	0	970	0	1.51507	0	0	0	0	0	0	1	1	0	0	0	0	0	0	0	1
0	0	1	0	0	981	0	0.180822	0	0	0	0	0	0	1	0.180822	0	0	0	0	0	0	0	1
0	0	1	0	0	990	0	2.74247	0	0	0	0	0	0	1	1	0	0	0	0	0	0	0	1
0	0	1	0	0	1011	0	1.62466	0	0	0	0	0	0	1	1	0	0	0	0	0	0	0	1
0	0	1	0	0	1024	0	3.02192	0	0	0	0	15	1	1	1	0	0	0	0	0	0	0	1
0	0	1	0	0	1027	0	3.06301	0	0	0	0	7.5	1	1	1	0	0	0	0	0	0	0	1
0	0	1	0	0	1029	0	5.8274	0	0	0	0	19	1	1	1	0	0	0	0	0	0	0	1
0	0	1	0	0	1034	0	3.06027	0	1	0	1	0	0	2	1	0	0	0	0	0	0	0	1
0	0	1	0	0	1037	0	1.94795	0	0	0	0	0	0	1	1	0	0	0	0	0	0	0	1
0	0	1	0	0	1051	0	2.63836	0	0	0	0	0	0	1	1	0	0	0	0	0	0	0	1
0	0	1	0	0	1055	0	1.29041	0	0	0	0	0	0	1	1	0	0	0	0	0	0	0	1
0	0	1	0	0	1056	0	4.11781	0	0	0	0	18.3333	1	1	1	0	0	0	0	0	0	0	1
0	0	1	0	0	1075	0	5.21644	0	0	0	0	31.8106	1	1	1	0	0	0	0	0	0	0	1
0	0	1	0	0	1094	0	3.88493	0	0	0	0	6	1	1	1	0	0	0	0	0	0	0	1
0	0	1	0	0	1104	0	2.91507	0	0	0	0	7.5	1	1	1	0	0	0	0	0	0	0	1
0	0	1	0	0	1114	0	1.93425	0	0	0	0	0	0	1	1	0	0	0	0	0	0	0	1
0	0	1	0	0	1119	0	3.96986	0	0	0	0	3.75	1	1	1	0	0	0	0	0	0	0	1
0	0	1	0	0	1134	0	3.79452	0	0	0	0	0	0	1	1	0	0	0	0	0	0	0	1
0	0	1	0	0	1137	0	0.361644	0	0	0	0	0	0	1	0.361644	0	0	0	0	0	0	0	1
0	0	1	0	0	1138	0	4.67945	0	0	0	0	9.5	1	1	1	0	0	0	0	0	0	0	1
0	0	1	0	0	1151	0	2.43288	0	0	0	0	9.13386	1	1	1	0	0	0	0	0	0	0	1
0	0	1	0	0	1181	0	4.25479	0	0	0	0	19.5238	1	1	1	0	0	0	0	0	0	0	1
0	0	1	0	0	1183	0	3.25753	0	0	0	0	0	0	1	1	0	0	0	0	0	0	0	1
0	0	1	0	0	1203	0	3.36986	0	0	0	0	1.5	1	1	1	0	0	0	0	0	0	0	1
0	0	1	0	0	1211	0	4.44384	0	0	0	0	50	1	1	1	0	0	0	0	0	0	0	1
0	0	1	0	0	1212	0	5.74795	0	0	0	0	25.8077	1	1	1	0	0	0	0	0	0	0	1
0	0	1	0	0	1217	0	5.33699	0	0	0	0	20	1	1	1	0	0	0	0	0	0	0	1
0	0	1	0	0	1237	0	0.361644	0	0	0	0	0	0	1	0.361644	0	0	0	0	0	0	0	1
0	0	1	0	0	1245	0	0.860274	0	0	0	0	0	0	1	0.860274	0	0	0	0	0	0	0	1
0	0	1	0	0	1252	0	1.19726	0	0	0	0	0	0	1	1	0	0	0	0	0	0	0	1
0	0	1	0	0	1254	0	5.63836	0	1	0	1	13.6932	1	2	1	0	0	0	0	0	0	0	1
0	0	1	0	0	1271	0	2.37808	0	1	0	1	0	0	2	1	0	0	0	0	0	0	0	1
0	0	1	0	0	1276	0	5.50137	0	0	0	0	20	1	1	1	0	0	0	0	0	0	0	1
0	0	1	0	0	1278	0	3.38904	0	0	0	0	0	0	1	1	0	0	0	0	0	0	0	1
0	0	1	0	0	1293	0	1.63014	0	0	0	0	0	0	1	1	0	0	0	0	0	0	0	1
0	0	1	0	0	1294	0	1.07945	0	0	0	0	0	0	1	1	0	0	0	0	0	0	0	1
0	0	1	0	0	1295	0	2.84384	1	0	0	1	7.5	1	2	1	0	0	0	0	0	0	0	1
0	0	1	0	0	1307	0	4.61096	0	0	0	0	18.7571	1	1	1	0	0	0	0	0	0	0	1
0	0	1	0	0	1313	0	2.49315	0	0	0	0	0	0	1	1	0	0	0	0	0	0	0	1
0	0	1	0	0	1315	0	0.391781	0	0	0	0	0	0	1	0.391781	0	0	0	0	0	0	0	1
0	0	1	0	0	1327	0	1.83836	0	0	0	0	0	0	1	1	0	0	0	0	0	0	0	1
0	0	1	0	0	1334	0	5.26301	0	0	0	0	0	0	1	1	0	0	0	0	0	0	0	1
0	0	1	0	0	1366	0	3.32877	0	0	0	0	13.2143	1	1	1	0	0	0	0	0	0	0	1
0	0	1	0	0	1385	0	1.36164	0	0	0	0	0	0	1	1	0	0	0	0	0	0	0	1
0	0	1	0	0	1398	0	4.57808	0	0	0	0	10	1	1	1	0	0	0	0	0	0	0	1
0	0	1	0	0	1403	0	0.0739726	0	0	0	0	0	0	1	0.0739726	0	0	0	0	0	0	0	1
0	0	1	0	0	1405	0	1.70411	0	0	0	0	5	1	1	1	0	0	0	0	0	0	0	1
0	0	1	0	0	1406	0	0.487671	0	0	0	0	0	0	1	0.487671	0	0	0	0	0	0	0	1
0	0	1	0	0	1408	0	1.96712	0	0	0	0	0	0	1	1	0	0	0	0	0	0	0	1
0	0	1	0	0	1413	0	5.36164	0	0	0	0	7.5	1	1	1	0	0	0	0	0	0	0	1
0	0	1	0	0	1414	0	1.32877	0	0	0	0	0	0	1	1	0	0	0	0	0	0	0	1
0	0	1	0	0	1423	0	4.9726	0	0	0	0	20	1	1	1	0	0	0	0	0	0	0	1
0	0	1	0	0	1439	0	3.46575	0	0	0	0	0	0	1	1	0	0	0	0	0	0	0	1
0	0	1	0	0	1445	0	1.52329	0	0	0	0	0	0	1	1	0	0	0	0	0	0	0	1
0	0	1	0	0	1447	0	2.21918	0	0	0	0	0	0	1	1	0	0	0	0	0	0	0	1
0	0	1	0	0	1461	0	0.816438	0	0	0	0	0	0	1	0.816438	0	0	0	0	0	0	0	1
0	0	1	0	0	1468	0	2.63288	0	0	0	0	0	0	1	1	0	0	0	0	0	0	0	1
0	0	1	0	0	1470	0	1.06849	0	0	0	0	0	0	1	1	0	0	0	0	0	0	0	1
0	0	1	0	0	1471	0	0.509589	0	0	0	0	0	0	1	0.509589	0	0	0	0	0	0	0	1
0	0	1	0	0	1477	0	3.08493	0	0	0	0	0	0	1	1	0	0	0	0	0	0	0	1
0	0	1	0	0	1497	0	2.65479	0	0	0	0	3.33333	1	1	1	0	0	0	0	0	0	0	1
0	0	1	0	0	1507	0	3.79178	0	0	0	0	0	0	1	1	0	0	0	0	0	0	0	1
0	0	1	0	0	1519	0	4.13699	0	0	0	0	34.5238	1	1	1	0	0	0	0	0	0	0	1
0	0	1	0	0	1538	0	3.37534	0	0	0	0	15	1	1	1	0	0	0	0	0	0	0	1
0	0	1	0	0	1539	0	0.287671	0	0	0	0	0	0	1	0.287671	0	0	0	0	0	0	0	1
0	0	1	0	0	1548	0	2.11781	0	0	0	0	0	0	1	1	0	0	0	0	0	0	0	1
0	0	1	0	0	1554	0	0.805479	0	0	0	0	0	0	1	0.805479	0	0	0	0	0	0	0	1
0	0	1	0	0	1578	0	1.83562	0	0	0	0	0	0	1	1	0	0	0	0	0	0	0	1
0	0	1	0	0	1584	0	3.62466	0	0	0	0	0	0	1	1	0	0	0	0	0	0	0	1
0	0	1	0	0	1597	0	5.93699	0	0	0	0	15	1	1	1	0	0	0	0	0	0	0	1
0	0	1	0	0	1599	0	2.88493	0	0	0	0	2.10526	1	1	1	0	0	0	0	0	0	0	1
0	0	1	0	0	1672	0	0.682192	0	0	0	0	0	0	1	0.682192	0	0	0	0	0	0	0	1
0	0	1	0	0	1678	0	4.58082	0	0	0	0	0	0	1	1	0	0	0	0	0	0	0	1
0	0	1	0	0	1681	0	4.23836	0	0	0	0	73.3333	1	1	1	0	0	0	0	0	0	0	1
0	0	1	0	0	1688	0	3.29315	0	0	0	0	20	1	1	1	0	0	0	0	0	0	0	1
0	0	1	0	0	1698	0	2.14521	0	0	0	0	0	0	1	1	0	0	0	0	0	0	0	1
0	0	1	0	0	1701	0	5.47945	0	0	0	0	20	1	1	1	0	0	0	0	0	0	0	1
0	0	1	0	0	1702	0	2.38356	0	0	0	0	2.9798	1	1	1	0	0	0	0	0	0	0	1
0	0	1	0	0	1706	0	3.23014	0	0	0	0	0	0	1	1	0	0	0	0	0	0	0	1
0	0	1	0	0	1726	0	3.71507	0	1	0	1	5.875	1	2	1	0	0	0	0	0	0	0	1
0	0	1	0	0	1730	0	1.14521	0	0	0	0	0	0	1	1	0	0	0	0	0	0	0	1
0	0	1	0	0	1745	0	5.90411	0	0	0	0	0	0	1	1	0	0	0	0	0	0	0	1
0	0	1	0	0	1747	0	2.9726	0	0	0	0	0	0	1	1	0	0	0	0	0	0	0	1
0	0	1	0	0	1749	0	5.50411	0	0	0	0	0	0	1	1	0	0	0	0	0	0	0	1
0	0	1	0	0	1769	0	4.66027	0	0	0	0	0	0	1	1	0	0	0	0	0	0	0	1
0	0	1	0	0	1779	0	5.14795	0	0	0	0	0	0	1	1	0	0	0	0	0	0	0	1
0	0	1	0	0	1787	0	3.87397	0	0	0	0	0	0	1	1	0	0	0	0	0	0	0	1
0	0	1	0	0	1802	0	4.29041	0	0	0	0	10	1	1	1	0	0	0	0	0	0	0	1
0	0	1	0	0	1812	0	5.14521	0	0	0	0	4.30233	1	1	1	0	0	0	0	0	0	0	1
0	0	1	0	0	1828	0	0.268493	0	0	0	0	0	0	1	0.268493	0	0	0	0	0	0	0	1
0	0	1	0	0	1829	0	2.46027	0	0	0	0	0	0	1	1	0	0	0	0	0	0	0	1
0	0	1	0	0	1839	0	3.2411	0	0	0	0	0	0	1	1	0	0	0	0	0	0	0	1
0	0	1	0	0	1855	0	0.983562	0	0	0	0	0	0	1	0.983562	0	0	0	0	0	0	0	1
0	0	1	0	0	1863	0	4.49863	0	0	0	0	0	0	1	1	0	0	0	0	0	0	0	1
0	0	1	0	0	1888	0	3.65205	0	0	0	0	0	0	1	1	0	0	0	0	0	0	0	1
0	0	1	0	0	1889	0	2.2411	0	0	0	0	0	0	1	1	0	0	0	0	0	0	0	1
0	0	1	0	0	1890	0	2.20274	0	0	0	0	15	1	1	1	0	0	0	0	0	0	0	1
0	0	1	0	0	1895	0	0.342466	0	0	0	0	0	0	1	0.342466	0	0	0	0	0	0	0	1
0	0	1	0	0	1901	0	3.87945	0	0	0	0	0	0	1	1	0	0	0	0	0	0	0	1
0	0	1	0	0	1902	0	3.98356	0	0	0	0	0	0	1	1	0	0	0	0	0	0	0	1
0	0	1	0	0	1915	0	1.9726	0	0	0	0	0	0	1	1	0	0	0	0	0	0	0	1
0	0	1	0	0	1920	0	1.14247	0	0	0	0	0	0	1	1	0	0	0	0	0	0	0	1
0	0	1	0	0	1921	0	2.69863	0	0	0	0	5	1	1	1	0	0	0	0	0	0	0	1
0	0	1	0	0	1941	0	1.54247	0	0	0	0	0	0	1	1	0	0	0	0	0	0	0	1
0	0	1	0	0	1944	0	1.29041	0	0	0	0	0	0	1	1	0	0	0	0	0	0	0	1
0	0	1	0	0	1959	0	1.61918	0	0	0	0	0	0	1	1	0	0	0	0	0	0	0	1
0	0	1	0	0	1965	0	0.238356	0	0	0	0	0	0	1	0.238356	0	0	0	0	0	0	0	1
0	0	1	0	0	1985	0	0.947945	0	0	0	0	0	0	1	0.947945	0	0	0	0	0	0	0	1
0	0	1	0	0	2002	0	4.59726	0	0	0	0	7.85714	1	1	1	0	0	0	0	0	0	0	1
0	0	1	0	0	2007	0	3.08219	0	0	0	0	9.75	1	1	1	0	0	0	0	0	0	0	1
0	0	1	0	0	2015	0	4.10411	0	0	0	0	18.0952	1	1	1	0	0	0	0	0	0	0	1
0	0	1	0	0	2024	0	3.30411	0	1	0	1	0	0	2	1	0	0	0	0	0	0	0	1
0	0	1	0	0	2034	0	3.06575	0	0	0	0	0	0	1	1	0	0	0	0	0	0	0	1
0	0	1	0	0	2037	0	5.99178	1	0	0	1	6.78161	1	2	1	0	0	0	0	0	0	0	1
0	0	1	0	0	2040	0	1.53151	0	0	0	0	0	0	1	1	0	0	0	0	0	0	0	1
0	0	1	0	0	2046	0	4.93425	0	0	0	0	0	0	1	1	0	0	0	0	0	0	0	1
0	0	1	0	0	2059	0	4.3589	0	0	0	0	0	0	1	1	0	0	0	0	0	0	0	1
0	0	1	0	0	2064	0	1.25479	0	0	0	0	0	0	1	1	0	0	0	0	0	0	0	1
0	0	1	0	0	2086	0	5.29041	0	0	0	0	11.7857	1	1	1	0	0	0	0	0	0	0	1
0	0	1	0	0	2089	0	0.49863	0	0	0	0	0	0	1	0.49863	0	0	0	0	0	0	0	1
0	0	1	0	0	2097	0	2.17534	0	0	0	0	0	0	1	1	0	0	0	0	0	0	0	1
0	0	1	0	0	2103	0	2.91233	0	0	0	0	0	0	1	1	0	0	0	0	0	0	0	1
0	0	1	0	0	2110	0	1.72603	0	0	0	0	0	0	1	1	0	0	0	0	0	0	0	1
0	0	1	0	0	2112	0	0.70411	0	0	0	0	0	0	1	0.70411	0	0	0	0	0	0	0	1
0	0	1	0	0	2123	0	0.473973	0	0	0	0	0	0	1	0.473973	0	0	0	0	0	0	0	1
0	0	1	0	0	2124	0	1.38082	0	0	0	0	0	0	1	1	0	0	0	0	0	0	0	1
0	0	1	0	0	2127	0	5.15616	0	0	0	0	10.9066	1	1	1	0	0	0	0	0	0	0	1
0	0	1	0	0	2131	0	5.09041	0	0	0	0	29.5	1	1	1	0	0	0	0	0	0	0	1
0	0	1	0	0	2140	0	4.15616	0	0	0	0	0	0	1	1	0	0	0	0	0	0	0	1
0	0	1	0	0	2143	0	2.53151	0	0	0	0	0	0	1	1	0	0	0	0	0	0	0	1
0	0	1	0	0	2149	0	2.24932	0	0	0	0	0	0	1	1	0	0	0	0	0	0	0	1
0	0	1	0	0	2152	0	0.50411	0	0	0	0	0	0	1	0.50411	0	0	0	0	0	0	0	1
0	0	1	0	0	2156	0	2.86575	0	0	0	0	0	0	1	1	0	0	0	0	0	0	0	1
0	0	1	0	0	2158	0	0.608219	0	0	0	0	0	0	1	0.608219	0	0	0	0	0	0	0	1
0	0	1	0	0	2166	0	4.42466	0	0	0	0	0	0	1	1	0	0	0	0	0	0	0	1
0	0	1	0	0	2173	0	5.96438	0	0	0	0	7.73585	1	1	1	0	0	0	0	0	0	0	1
0	0	1	0	0	2178	0	5.09041	0	0	0	0	13.6366	1	1	1	0	0	0	0	0	0	0	1
0	0	1	0	0	2209	0	4.9726	0	0	0	0	0	0	1	1	0	0	0	0	0	0	0	1
0	0	1	0	0	2223	0	3.73425	0	0	0	0	0	0	1	1	0	0	0	0	0	0	0	1
0	0	1	0	0	2228	0	0.479452	0	0	0	0	0	0	1	0.479452	0	0	0	0	0	0	0	1
0	0	1	0	0	2243	0	0.594521	0	0	0	0	0	0	1	0.594521	0	0	0	0	0	0	0	1
0	0	1	0	0	2262	0	4.53151	0	1	0	1	12.4494	1	2	1	0	0	0	0	0	0	0	1
0	0	1	0	0	2272	0	2.90685	0	0	0	0	10	1	1	1	0	0	0	0	0	0	0	1
0	0	1	0	0	2317	0	1.34795	0	0	0	0	0	0	1	1	0	0	0	0	0	0	0	1
0	0	1	0	0	2328	0	5.81918	0	0	0	0	6.42857	1	1	1	0	0	0	0	0	0	0	1
0	0	1	0	0	2333	0	2.53151	0	0	0	0	4	1	1	1	0	0	0	0	0	0	0	1
0	0	1	0	0	2334	0	0.320548	0	0	0	0	0	0	1	0.320548	0	0	0	0	0	0	0	1
0	0	1	0	0	2340	0	4.21096	0	0	0	0	60	1	1	1	0	0	0	0	0	0	0	1
0	0	1	0	0	2373	0	0.668493	0	0	0	0	0	0	1	0.668493	0	0	0	0	0	0	0	1
0	0	1	0	0	2381	0	5.4137	0	0	0	0	10.7143	1	1	1	0	0	0	0	0	0	0	1
0	0	1	0	0	2386	0	1.45753	0	0	0	0	0	0	1	1	0	0	0	0	0	0	0	1
0	0	1	0	0	2403	0	5.74521	0	0	0	0	39.2145	1	1	1	0	0	0	0	0	0	0	1
0	0	1	0	0	2405	0	1.16986	0	0	0	0	0	0	1	1	0	0	0	0	0	0	0	1
0	0	1	0	0	2407	0	2.88493	0	0	0	0	10	1	1	1	0	0	0	0	0	0	0	1
0	0	1	0	0	2416	0	5.87945	0	0	0	0	7.5	1	1	1	0	0	0	0	0	0	0	1
0	0	1	0	0	2424	0	5.21096	0	0	0	0	0	0	1	1	0	0	0	0	0	0	0	1
0	0	1	0	0	2427	0	1.15068	0	0	0	0	0	0	1	1	0	0	0	0	0	0	0	1
0	0	1	0	0	2433	0	2.08219	0	0	0	0	0	0	1	1	0	0	0	0	0	0	0	1
0	0	1	0	0	2445	0	0.621918	0	0	0	0	0	0	1	0.621918	0	0	0	0	0	0	0	1
0	0	1	0	0	2448	0	0.227397	0	0	0	0	0	0	1	0.227397	0	0	0	0	0	0	0	1
0	0	1	0	0	2453	0	2.60822	0	1	0	1	83.7489	1	2	1	0	0	0	0	0	0	0	1
0	0	1	0	0	2467	0	1.53151	0	0	0	0	11.75	1	1	1	0	0	0	0	0	0	0	1
0	0	1	0	0	2468	0	4.66849	0	0	0	0	0	0	1	1	0	0	0	0	0	0	0	1
0	0	1	0	0	2474	0	2.01096	0	0	0	0	10	1	1	1	0	0	0	0	0	0	0	1
0	0	1	0	0	2494	0	2.67671	0	0	0	0	34.5588	1	1	1	0	0	0	0	0	0	0	1
0	0	1	0	0	2528	0	1.2137	0	0	0	0	0	0	1	1	0	0	0	0	0	0	0	1
0	0	1	0	0	2537	0	0.479452	0	0	0	0	0	0	1	0.479452	0	0	0	0	0	0	0	1
0	0	1	0	0	2541	0	3.98356	0	0	0	0	25.4255	1	1	1	0	0	0	0	0	0	0	1
0	0	1	0	0	2553	0	0.512329	0	0	0	0	0	0	1	0.512329	0	0	0	0	0	0	0	1
0	0	1	0	0	2558	0	3.99452	0	0	0	0	7.84375	1	1	1	0	0	0	0	0	0	0	1
0	0	1	0	0	2582	0	3.40822	0	1	0	1	0	0	2	1	0	0	0	0	0	0	0	1
0	0	1	0	0	2587	0	1.95068	0	1	0	1	3.55263	1	2	1	0	0	0	0	0	0	0	1
0	0	1	0	0	2590	0	2.9726	0	0	0	0	20	1	1	1	0	0	0	0	0	0	0	1
0	0	1	0	0	2594	0	3.29863	0	0	0	0	5	1	1	1	0	0	0	0	0	0	0	1
0	0	1	0	0	2596	0	4.18082	0	0	0	0	50	1	1	1	0	0	0	0	0	0	0	1
0	0	1	0	0	2599	0	0.457534	0	0	0	0	0	0	1	0.457534	0	0	0	0	0	0	0	1
0	0	1	0	0	2601	0	3.72877	0	0	0	0	1.5	1	1	1	0	0	0	0	0	0	0	1
0	0	1	0	0	2604	0	2.26027	0	0	0	0	0	0	1	1	0	0	0	0	0	0	0	1
0	0	1	0	0	2614	0	4.91781	0	0	0	0	37	1	1	1	0	0	0	0	0	0	0	1
0	0	1	0	0	2672	0	1.08493	0	0	0	0	0	0	1	1	0	0	0	0	0	0	0	1
0	0	1	0	0	2674	0	2.0137	0	0	0	0	0	0	1	1	0	0	0	0	0	0	0	1
0	0	1	0	0	2676	0	4.0274	0	0	0	0	0	0	1	1	0	0	0	0	0	0	0	1
0	0	1	0	0	2680	0	3.6411	0	0	0	0	0	0	1	1	0	0	0	0	0	0	0	1
0	0	1	0	0	2686	0	2.12603	0	0	0	0	3.02817	1	1	1	0	0	0	0	0	0	0	1
0	0	1	0	0	2687	0	2.45479	0	0	0	0	0	0	1	1	0	0	0	0	0	0	0	1
0	0	1	0	0	2695	0	4.33425	0	0	0	0	0	0	1	1	0	0	0	0	0	0	0	1
0	0	1	0	0	2703	0	0.49863	0	0	0	0	0	0	1	0.49863	0	0	0	0	0	0	0	1
0	0	1	0	0	2706	0	1.85753	0	0	0	0	0	0	1	1	0	0	0	0	0	0	0	1
0	0	1	0	0	2712	0	3.87123	0	0	0	0	4.28571	1	1	1	0	0	0	0	0	0	0	1
0	0	1	0	0	2715	0	1.9863	0	0	0	0	0	0	1	1	0	0	0	0	0	0	0	1
0	0	1	0	0	2717	0	3.78356	0	0	0	0	10	1	1	1	0	0	0	0	0	0	0	1
0	0	1	0	0	2722	0	1.7589	0	0	0	0	0	0	1	1	0	0	0	0	0	0	0	1
0	0	1	0	0	2733	0	1.30137	0	0	0	0	0	0	1	1	0	0	0	0	0	0	0	1
0	0	1	0	0	2764	0	2.06301	0	0	0	0	0	0	1	1	0	0	0	0	0	0	0	1
0	0	1	0	0	2776	0	0.687671	0	0	0	0	0	0	1	0.687671	0	0	0	0	0	0	0	1
0	0	1	0	0	2796	0	4.81918	0	0	0	0	0	0	1	1	0	0	0	0	0	0	0	1
0	0	1	0	0	2802	0	4.51507	0	1	0	1	102.5	1	2	1	0	0	0	0	0	0	0	1
0	0	1	0	0	2811	0	3.23014	0	0	0	0	0	0	1	1	0	0	0	0	0	0	0	1
0	0	1	0	0	2821	0	1.87123	0	0	0	0	8.33333	1	1	1	0	0	0	0	0	0	0	1
0	0	1	0	0	2826	0	4.17534	0	0	0	0	0	0	1	1	0	0	0	0	0	0	0	1
0	0	1	0	0	2836	0	5.99726	0	0	0	0	0	0	1	1	0	0	0	0	0	0	0	1
0	0	1	0	0	2838	0	3.56164	0	0	0	0	10	1	1	1	0	0	0	0	0	0	0	1
0	0	1	0	0	2849	0	5.75068	0	0	0	0	15	1	1	1	0	0	0	0	0	0	0	1
0	0	1	0	0	2869	0	5.95616	0	0	0	0	0	0	1	1	0	0	0	0	0	0	0	1
0	0	1	0	0	2871	0	2.79452	0	0	0	0	0	0	1	1	0	0	0	0	0	0	0	1
0	0	1	0	0	2873	0	2.42466	0	0	0	0	0	0	1	1	0	0	0	0	0	0	0	1
0	0	1	0	0	2887	0	1.66027	0	0	0	0	0	0	1	1	0	0	0	0	0	0	0	1
0	0	1	0	0	2888	0	4.53425	0	0	0	0	0	0	1	1	0	0	0	0	0	0	0	1
0	0	1	0	0	2898	0	4.88767	0	0	0	0	0	0	1	1	0	0	0	0	0	0	0	1
0	0	1	0	0	2910	0	3.11507	0	0	0	0	0	0	1	1	0	0	0	0	0	0	0	1
0	0	1	0	0	2911	0	4.62192	0	0	0	0	0	0	1	1	0	0	0	0	0	0	0	1
0	0	1	0	0	2918	0	5.3589	0	0	0	0	0	0	1	1	0	0	0	0	0	0	0	1
0	0	1	0	0	2952	0	0.728767	0	0	0	0	0	0	1	0.728767	0	0	0	0	0	0	0	1
0	0	1	0	0	2957	0	1.19452	0	0	0	0	0	0	1	1	0	0	0	0	0	0	0	1
0	0	1	0	0	2959	0	1.49315	0	0	0	0	0	0	1	1	0	0	0	0	0	0	0	1
0	0	1	0	0	2963	0	0.323288	0	0	0	0	0	0	1	0.323288	0	0	0	0	0	0	0	1
0	0	1	0	0	2969	0	4.96438	0	0	0	0	0	0	1	1	0	0	0	0	0	0	0	1
0	0	1	0	0	2973	0	3.60548	0	0	0	0	0	0	1	1	0	0	0	0	0	0	0	1
0	0	1	0	0	2982	0	0.476712	0	0	0	0	0	0	1	0.476712	0	0	0	0	0	0	0	1
0	0	1	0	0	2988	0	3.2411	0	0	0	0	0	0	1	1	0	0	0	0	0	0	0	1
0	0	1	0	0	2996	0	2.93425	0	0	0	0	0	0	1	1	0	0	0	0	0	0	0	1
0	0	1	0	0	3003	0	0.153425	0	0	0	0	0	0	1	0.153425	0	0	0	0	0	0	0	1
0	0	1	0	0	3014	0	4.7726	0	0	0	0	13.9655	1	1	1	0	0	0	0	0	0	0	1
0	0	1	0	0	3030	0	4.32603	0	0	0	0	0	0	1	1	0	0	0	0	0	0	0	1
0	0	1	0	0	3033	0	2.89589	0	0	0	0	0	0	1	1	0	0	0	0	0	0	0	1
0	0	1	0	0	3055	0	5.52877	0	0	0	0	14.8387	1	1	1	0	0	0	0	0	0	0	1
0	0	1	0	0	3075	0	0.30137	0	0	0	0	0	0	1	0.30137	0	0	0	0	0	0	0	1
0	0	1	0	0	3096	0	0.717808	0	0	0	0	0	0	1	0.717808	0	0	0	0	0	0	0	1
0	0	1	0	0	3098	0	5.25205	1	0	0	1	7.04082	1	2	1	0	0	0	0	0	0	0	1
0	0	1	0	0	3099	0	3.68219	0	0	0	0	0	0	1	1	0	0	0	0	0	0	0	1
0	0	1	0	0	3100	0	2.10685	0	0	0	0	0	0	1	1	0	0	0	0	0	0	0	1
0	0	1	0	0	3109	0	4.18082	0	0	0	0	17	1	1	1	0	0	0	0	0	0	0	1
0	0	1	0	0	3134	0	5.11781	1	1	0	1	33.3333	1	2	1	0	0	0	0	0	0	0	1
0	0	1	0	0	3135	0	0.454795	0	0	0	0	0	0	1	0.454795	0	0	0	0	0	0	0	1
0	0	1	0	0	3136	0	0.4	0	0	0	0	0	0	1	0.4	0	0	0	0	0	0	0	1
0	0	1	0	0	3152	0	4.82466	0	0	0	0	1.76966	1	1	1	0	0	0	0	0	0	0	1
0	0	1	0	0	3168	0	5.27397	0	0	0	0	0	0	1	1	0	0	0	0	0	0	0	1
0	0	1	0	0	3177	0	4.29041	0	0	0	0	0	0	1	1	0	0	0	0	0	0	0	1
0	0	1	0	0	3189	0	2.53151	0	0	0	0	10.9946	1	1	1	0	0	0	0	0	0	0	1
0	0	1	0	0	3191	0	5.50411	0	1	0	1	7.84198	1	2	1	0	0	0	0	0	0	0	1
0	0	1	0	0	3201	0	3.4274	0	0	0	0	0	0	1	1	0	0	0	0	0	0	0	1
0	0	1	0	0	3213	0	5.11233	0	0	0	0	16.6667	1	1	1	0	0	0	0	0	0	0	1
0	0	1	0	0	3217	0	0.657534	0	0	0	0	0	0	1	0.657534	0	0	0	0	0	0	0	1
0	0	1	0	0	3223	0	4.49863	0	0	1	1	5	1	2	1	0	0	0	0	0	0	0	1
0	0	1	0	0	3226	0	4.63288	0	0	0	0	0	0	1	1	0	0	0	0	0	0	0	1
0	0	1	0	0	3236	0	1.12055	0	0	0	0	0	0	1	1	0	0	0	0	0	0	0	1
0	0	1	0	0	3237	0	5.66575	0	0	0	0	8.33333	1	1	1	0	0	0	0	0	0	0	1
0	0	1	0	0	3257	0	3.91233	0	0	0	0	0	0	1	1	0	0	0	0	0	0	0	1
0	0	1	0	0	3262	0	4.10137	0	0	0	0	0	0	1	1	0	0	0	0	0	0	0	1
0	0	1	0	0	3267	0	3.33699	0	0	0	0	0	0	1	1	0	0	0	0	0	0	0	1
0	0	1	0	0	3296	0	1.6411	0	0	0	0	0	0	1	1	0	0	0	0	0	0	0	1
0	0	1	0	0	3299	0	2.32877	0	0	0	0	0	0	1	1	0	0	0	0	0	0	0	1
0	0	1	0	0	3308	0	1.72603	0	0	0	0	0	0	1	1	0	0	0	0	0	0	0	1
0	0	1	0	0	3333	0	0.147945	0	0	0	0	0	0	1	0.147945	0	0	0	0	0	0	0	1
0	0	1	0	0	3334	0	4.63014	0	0	0	0	0	0	1	1	0	0	0	0	0	0	0	1
0	0	1	0	0	3337	0	5.2411	0	0	0	0	30	1	1	1	0	0	0	0	0	0	0	1
0	0	1	0	0	3341	0	4.71781	0	0	0	0	0	0	1	1	0	0	0	0	0	0	0	1
0	0	1	0	0	3355	0	4.06301	0	0	0	0	0	0	1	1	0	0	0	0	0	0	0	1
0	0	1	0	0	3376	0	1.4	0	0	0	0	0	0	1	1	0	0	0	0	0	0	0	1
0	0	1	0	0	3395	0	1.34247	0	0	0	0	0	0	1	1	0	0	0	0	0	0	0	1
0	0	1	0	0	3400	0	3.16986	0	0	0	0	0	0	1	1	0	0	0	0	0	0	0	1
0	0	1	0	0	3406	0	1.93151	0	0	0	0	0	0	1	1	0	0	0	0	0	0	0	1
0	0	1	0	0	3413	0	2.11507	0	0	0	0	15	1	1	1	0	0	0	0	0	0	0	1
0	0	1	0	0	3425	0	4.43836	0	0	0	0	13.3333	1	1	1	0	0	0	0	0	0	0	1
0	0	1	0	0	3428	0	2.40548	0	0	0	0	12.5	1	1	1	0	0	0	0	0	0	0	1
0	0	1	0	0	3439	0	4.36712	0	0	0	0	0	0	1	1	0	0	0	0	0	0	0	1
0	0	1	0	0	3441	0	0.208219	0	0	0	0	0	0	1	0.208219	0	0	0	0	0	0	0	1
0	0	1	0	0	3445	0	4.64932	0	0	0	0	15	1	1	1	0	0	0	0	0	0	0	1
0	0	1	0	0	3462	0	0.345205	0	0	0	0	0	0	1	0.345205	0	0	0	0	0	0	0	1
0	0	1	0	0	3466	0	0.0767123	0	0	0	0	0	0	1	0.0767123	0	0	0	0	0	0	0	1
0	0	1	0	0	3480	0	2.62192	0	0	0	0	20	1	1	1	0	0	0	0	0	0	0	1
0	0	1	0	0	3487	0	1.70411	0	0	0	0	0	0	1	1	0	0	0	0	0	0	0	1
0	0	1	0	0	3491	0	4.45753	0	0	0	0	3.77551	1	1	1	0	0	0	0	0	0	0	1
0	0	1	0	0	3509	0	3.6	0	0	0	0	23.3333	1	1	1	0	0	0	0	0	0	0	1
0	0	1	0	0	3531	0	0.249315	0	0	0	0	0	0	1	0.249315	0	0	0	0	0	0	0	1
0	0	1	0	0	3536	0	2.24384	0	0	0	0	0	0	1	1	0	0	0	0	0	0	0	1
0	0	1	0	0	3551	0	2.29041	0	0	0	0	0	0	1	1	0	0	0	0	0	0	0	1
0	0	1	0	0	3560	0	0.60274	0	0	0	0	0	0	1	0.60274	0	0	0	0	0	0	0	1
0	0	1	0	0	3571	0	5.98082	0	0	0	0	7.14286	1	1	1	0	0	0	0	0	0	0	1
0	0	1	0	0	3581	0	2.03288	0	0	0	0	10	1	1	1	0	0	0	0	0	0	0	1
0	0	1	0	0	3586	0	1.20822	0	0	0	0	15	1	1	1	0	0	0	0	0	0	0	1
0	0	1	0	0	3587	0	3.79726	0	0	0	0	5.625	1	1	1	0	0	0	0	0	0	0	1
0	0	1	0	0	3596	0	4.90959	0	0	0	0	0	0	1	1	0	0	0	0	0	0	0	1
0	0	1	0	0	3597	0	5.65479	0	0	0	0	8.88889	1	1	1	0	0	0	0	0	0	0	1
0	0	1	0	0	3621	0	1.39178	0	0	0	0	0	0	1	1	0	0	0	0	0	0	0	1
0	0	1	0	0	3625	0	4.27123	0	0	0	0	0	0	1	1	0	0	0	0	0	0	0	1
0	0	1	0	0	3628	0	1.49589	0	0	0	0	9.29348	1	1	1	0	0	0	0	0	0	0	1
0	0	1	0	0	3632	0	3.89315	1	0	0	1	6.875	1	2	1	0	0	0	0	0	0	0	1
0	0	1	0	0	3638	0	5.35616	0	0	0	0	6.39535	1	1	1	0	0	0	0	0	0	0	1
0	0	1	0	0	3653	0	0.868493	0	0	0	0	0	0	1	0.868493	0	0	0	0	0	0	0	1
0	0	1	0	0	3664	0	5.09589	0	0	0	0	0	0	1	1	0	0	0	0	0	0	0	1
0	0	1	0	0	3673	0	4.40822	0	0	0	0	0	0	1	1	0	0	0	0	0	0	0	1
0	0	1	0	0	3692	0	0.227397	0	0	0	0	0	0	1	0.227397	0	0	0	0	0	0	0	1
0	0	1	0	0	3705	0	3.33151	0	0	0	0	0	0	1	1	0	0	0	0	0	0	0	1
0	0	1	0	0	3706	0	5.42192	0	0	0	0	37.5	1	1	1	0	0	0	0	0	0	0	1
0	0	1	0	0	3710	0	2.36712	0	0	0	0	0	0	1	1	0	0	0	0	0	0	0	1
0	0	1	0	0	3716	0	0.169863	0	0	0	0	0	0	1	0.169863	0	0	0	0	0	0	0	1
0	0	1	0	0	3742	0	3.9863	0	0	0	0	0	0	1	1	0	0	0	0	0	0	0	1
0	0	1	0	0	3743	0	0.421918	0	0	0	0	0	0	1	0.421918	0	0	0	0	0	0	0	1
0	0	1	0	0	3747	0	3.38082	0	0	0	0	10	1	1	1	0	0	0	0	0	0	0	1
0	0	1	0	0	3748	0	0.813699	0	0	0	0	0	0	1	0.813699	0	0	0	0	0	0	0	1
0	0	1	0	0	3754	0	4.53151	0	0	0	0	0	0	1	1	0	0	0	0	0	0	0	1
0	0	1	0	0	3758	0	3.37534	0	0	0	0	0	0	1	1	0	0	0	0	0	0	0	1
0	0	1	0	0	3778	0	4.49863	0	0	0	0	8.19444	1	1	1	0	0	0	0	0	0	0	1
0	0	1	0	0	3785	0	3.90959	1	0	0	1	133.627	1	2	1	0	0	0	0	0	0	0	1
0	0	1	0	0	3811	0	1.63014	0	0	0	0	0	0	1	1	0	0	0	0	0	0	0	1
0	0	1	0	0	3817	0	3.67123	0	0	0	0	0	0	1	1	0	0	0	0	0	0	0	1
0	0	1	0	0	3820	0	0.767123	0	0	0	0	0	0	1	0.767123	0	0	0	0	0	0	0	1
0	0	1	0	0	3821	0	4.39178	0	0	0	0	12.5	1	1	1	0	0	0	0	0	0	0	1
0	0	1	0	0	3822	0	0.775342	0	0	0	0	0	0	1	0.775342	0	0	0	0	0	0	0	1
0	0	1	0	0	3823	0	0.238356	0	0	0	0	0	0	1	0.238356	0	0	0	0	0	0	0	1
0	0	1	0	0	3824	0	3.5863	0	0	0	0	17.6984	1	1	1	0	0	0	0	0	0	0	1
0	0	1	0	0	3827	0	4.1726	0	0	0	0	0	0	1	1	0	0	0	0	0	0	0	1
0	0	1	0	0	3835	0	3.29041	0	0	0	0	12.8571	1	1	1	0	0	0	0	0	0	0	1
0	0	1	0	0	3836	0	3.36438	0	0	0	0	0	0	1	1	0	0	0	0	0	0	0	1
0	0	1	0	0	3862	0	1.43562	0	0	0	0	5	1	1	1	0	0	0	0	0	0	0	1
0	0	1	0	0	3863	0	5.52329	0	1	0	1	0	0	2	1	0	0	0	0	0	0	0	1
0	0	1	0	0	3868	0	5.47671	0	0	0	0	0	0	1	1	0	0	0	0	0	0	0	1
0	0	1	0	0	3872	0	5.84658	0	0	0	0	0	0	1	1	0	0	0	0	0	0	0	1
0	0	1	0	0	3880	0	0.287671	0	0	0	0	0	0	1	0.287671	0	0	0	0	0	0	0	1
0	0	1	0	0	3883	0	4.6	0	0	0	0	3.57143	1	1	1	0	0	0	0	0	0	0	1
0	0	1	0	0	3885	0	5.4	0	0	0	0	0	0	1	1	0	0	0	0	0	0	0	1
0	0	1	0	0	3890	0	3.13973	0	0	0	0	20	1	1	1	0	0	0	0	0	0	0	1
0	0	1	0	0	3891	0	5.08219	0	0	0	0	11.5	1	1	1	0	0	0	0	0	0	0	1
0	0	1	0	0	3902	0	2.55616	0	0	0	0	0	0	1	1	0	0	0	0	0	0	0	1
0	0	1	0	0	3903	0	2.39178	0	0	0	0	0	0	1	1	0	0	0	0	0	0	0	1
0	0	1	0	0	3905	0	2.81644	0	0	0	0	0	0	1	1	0	0	0	0	0	0	0	1
0	0	1	0	0	3908	0	1.53425	0	0	0	0	0	0	1	1	0	0	0	0	0	0	0	1
0	0	1	0	0	3913	0	3.87945	0	0	0	0	0	0	1	1	0	0	0	0	0	0	0	1
0	0	1	0	0	3915	0	2.33699	0	0	0	0	0	0	1	1	0	0	0	0	0	0	0	1
0	0	1	0	0	3935	0	0.4	0	0	0	0	0	0	1	0.4	0	0	0	0	0	0	0	1
0	0	1	0	0	3940	0	2.93151	0	0	0	0	15	1	1	1	0	0	0	0	0	0	0	1
0	0	1	0	0	3960	0	0.684932	0	0	0	0	0	0	1	0.684932	0	0	0	0	0	0	0	1
0	0	1	0	0	3967	0	1.85753	0	0	0	0	0.892857	1	1	1	0	0	0	0	0	0	0	1
0	0	1	0	0	3983	0	4.86301	0	0	0	0	2.33333	1	1	1	0	0	0	0	0	0	0	1
0	0	1	0	0	3986	0	1.69863	0	0	0	0	0	0	1	1	0	0	0	0	0	0	0	1
0	0	1	0	0	3996	0	2.83288	0	0	0	0	0	0	1	1	0	0	0	0	0	0	0	1
0	0	1	0	0	4004	0	4.64932	0	0	0	0	15	1	1	1	0	0	0	0	0	0	0	1
0	0	1	0	0	4008	0	2.69863	0	0	0	0	0	0	1	1	0	0	0	0	0	0	0	1
0	0	1	0	0	4012	0	2.23562	0	0	0	0	0	0	1	1	0	0	0	0	0	0	0	1
0	0	1	0	0	4016	0	1.82192	0	0	0	0	0	0	1	1	0	0	0	0	0	0	0	1
0	0	1	0	0	4021	0	2.53699	0	0	0	0	0	0	1	1	0	0	0	0	0	0	0	1
0	0	1	0	0	4027	0	1.87945	0	0	0	0	0	0	1	1	0	0	0	0	0	0	0	1
0	0	1	0	0	4035	0	0.243836	0	0	0	0	0	0	1	0.243836	0	0	0	0	0	0	0	1
0	0	1	0	0	4037	0	2.56438	1	0	0	1	17.5	1	2	1	0	0	0	0	0	0	0	1
0	0	1	0	0	4045	0	5.09863	1	0	0	1	1.25	1	2	1	0	0	0	0	0	0	0	1
0	0	1	0	0	4046	0	1.75342	0	0	0	0	0	0	1	1	0	0	0	0	0	0	0	1
0	0	1	0	0	4053	0	3.17534	0	0	0	0	0	0	1	1	0	0	0	0	0	0	0	1
0	0	1	0	0	4071	0	1.92603	0	0	0	0	10	1	1	1	0	0	0	0	0	0	0	1
0	0	1	0	0	4072	0	1.39178	0	0	0	0	19.2308	1	1	1	0	0	0	0	0	0	0	1
0	0	1	0	0	4075	0	5.48493	0	0	0	0	0	0	1	1	0	0	0	0	0	0	0	1
0	0	1	0	0	4081	0	4.44658	0	0	0	0	0	0	1	1	0	0	0	0	0	0	0	1
0	0	1	0	0	4096	0	5.93699	0	0	0	0	0	0	1	1	0	0	0	0	0	0	0	1
0	0	1	0	0	4110	0	3.94247	0	0	0	0	0	0	1	1	0	0	0	0	0	0	0	1
0	0	1	0	0	4126	0	3.84658	0	0	0	0	15	1	1	1	0	0	0	0	0	0	0	1
0	0	1	0	0	4127	0	0.263014	0	0	0	0	0	0	1	0.263014	0	0	0	0	0	0	0	1
0	0	1	0	0	4128	0	0.339726	0	0	0	0	0	0	1	0.339726	0	0	0	0	0	0	0	1
0	0	1	0	0	4131	0	0.589041	0	0	0	0	0	0	1	0.589041	0	0	0	0	0	0	0	1
0	0	1	0	0	4137	0	4.07123	0	0	0	0	0	0	1	1	0	0	0	0	0	0	0	1
0	0	1	0	0	4141	0	4.63014	0	0	0	0	0	0	1	1	0	0	0	0	0	0	0	1
0	0	1	0	0	4152	0	5.41918	0	0	0	0	0	0	1	1	0	0	0	0	0	0	0	1
0	0	1	0	0	4156	0	3.25479	0	0	0	0	0	0	1	1	0	0	0	0	0	0	0	1
0	0	1	0	0	4167	0	0.860274	0	0	0	0	0	0	1	0.860274	0	0	0	0	0	0	0	1
0	0	1	0	0	4174	0	1.03562	0	0	0	0	0	0	1	1	0	0	0	0	0	0	0	1
0	0	1	0	0	4200	0	2.16164	0	0	0	0	0	0	1	1	0	0	0	0	0	0	0	1
0	0	1	0	0	4201	0	0.323288	0	0	0	0	0	0	1	0.323288	0	0	0	0	0	0	0	1
0	0	1	0	0	4208	0	5.40274	0	0	0	0	15.5189	1	1	1	0	0	0	0	0	0	0	1
0	0	1	0	0	4214	0	3.13973	0	0	0	0	0	0	1	1	0	0	0	0	0	0	0	1
0	0	1	0	0	4220	0	4.86849	0	0	0	0	0	0	1	1	0	0	0	0	0	0	0	1
0	0	1	0	0	4235	0	0.819178	0	0	0	0	0	0	1	0.819178	0	0	0	0	0	0	0	1
0	0	1	0	0	4238	0	1.04384	0	0	0	0	0	0	1	1	0	0	0	0	0	0	0	1
0	0	1	0	0	4244	0	5.6274	0	0	0	0	15	1	1	1	0	0	0	0	0	0	0	1
0	0	1	0	0	4245	0	3.50137	0	0	0	0	9	1	1	1	0	0	0	0	0	0	0	1
0	0	1	0	0	4250	0	0.380822	0	0	0	0	0	0	1	0.380822	0	0	0	0	0	0	0	1
0	0	1	0	0	4256	0	4.13973	1	0	0	1	10	1	2	1	0	0	0	0	0	0	0	1
0	0	1	0	0	4258	0	0.950685	0	0	0	0	0	0	1	0.950685	0	0	0	0	0	0	0	1
0	0	1	0	0	4273	0	3.84658	0	0	0	0	0	0	1	1	0	0	0	0	0	0	0	1
0	0	1	0	0	4278	0	2.28767	0	0	0	0	0	0	1	1	0	0	0	0	0	0	0	1
0	0	1	0	0	4280	0	5.19452	0	0	0	0	0	0	1	1	0	0	0	0	0	0	0	1
0	0	1	0	0	4312	0	4.57808	0	0	0	0	5.34483	1	1	1	0	0	0	0	0	0	0	1
0	0	1	0	0	4313	0	4.73699	0	0	0	0	0	0	1	1	0	0	0	0	0	0	0	1
0	0	1	0	0	4330	0	3.71507	0	0	0	0	0	0	1	1	0	0	0	0	0	0	0	1
0	0	1	0	0	4341	0	3.98356	0	0	0	0	0	0	1	1	0	0	0	0	0	0	0	1
0	0	1	0	0	4356	0	4.35068	0	0	0	0	2.23214	1	1	1	0	0	0	0	0	0	0	1
0	0	1	0	0	4367	0	4.48493	0	0	0	0	0	0	1	1	0	0	0	0	0	0	0	1
0	0	1	0	0	4404	0	1.25205	0	0	0	0	7.5	1	1	1	0	0	0	0	0	0	0	1
0	0	1	0	0	4420	0	5.80822	0	1	0	1	12.7046	1	2	1	0	0	0	0	0	0	0	1
0	0	1	0	0	4422	0	1.12877	0	0	0	0	0	0	1	1	0	0	0	0	0	0	0	1
0	0	1	0	0	4429	0	4.29315	0	0	0	0	0	0	1	1	0	0	0	0	0	0	0	1
0	0	1	0	0	4434	0	2.18356	1	0	0	1	0	0	2	1	0	0	0	0	0	0	0	1
0	0	1	0	0	4435	0	1.99452	0	0	0	0	10	1	1	1	0	0	0	0	0	0	0	1
0	0	1	0	0	4443	0	0.312329	0	0	0	0	0	0	1	0.312329	0	0	0	0	0	0	0	1
0	0	1	0	0	4458	0	5.37808	0	0	0	0	0	0	1	1	0	0	0	0	0	0	0	1
0	0	1	0	0	4460	0	4.57808	0	0	0	0	0	0	1	1	0	0	0	0	0	0	0	1
0	0	1	0	0	4475	0	0.0575342	0	0	0	0	0	0	1	0.0575342	0	0	0	0	0	0	0	1
0	0	1	0	0	4477	0	2.81644	0	0	0	0	0	0	1	1	0	0	0	0	0	0	0	1
0	0	1	0	0	4493	0	4.05479	0	0	0	0	7.14286	1	1	1	0	0	0	0	0	0	0	1
0	0	1	0	0	4494	0	1.52329	0	0	0	0	0	0	1	1	0	0	0	0	0	0	0	1
0	0	1	0	0	4512	0	0.556164	0	0	0	0	0	0	1	0.556164	0	0	0	0	0	0	0	1
0	0	1	0	0	4530	0	4.40822	0	1	0	1	13.3333	1	2	1	0	0	0	0	0	0	0	1
0	0	1	0	0	4539	0	0.268493	0	0	0	0	0	0	1	0.268493	0	0	0	0	0	0	0	1
0	0	1	0	0	4548	0	5.60822	0	0	0	0	354.768	1	1	1	0	0	0	0	0	0	0	1
0	0	1	0	0	4551	0	2.9863	0	0	0	0	3.92857	1	1	1	0	0	0	0	0	0	0	1
0	0	1	0	0	4557	0	0.2	0	0	0	0	0	0	1	0.2	0	0	0	0	0	0	0	1
0	0	1	0	0	4559	0	0.6	0	0	0	0	0	0	1	0.6	0	0	0	0	0	0	0	1
0	0	1	0	0	4572	0	4.07671	0	0	0	0	0	0	1	1	0	0	0	0	0	0	0	1
0	0	1	0	0	4576	0	2.94247	0	0	0	0	0	0	1	1	0	0	0	0	0	0	0	1
0	0	1	0	0	4595	0	4.88767	0	0	0	0	3.125	1	1	1	0	0	0	0	0	0	0	1
0	0	1	0	0	4602	0	0.786301	0	0	0	0	0	0	1	0.786301	0	0	0	0	0	0	0	1
0	0	1	0	0	4615	0	2.02192	0	0	0	0	0	0	1	1	0	0	0	0	0	0	0	1
0	0	1	0	0	4624	0	1.20274	0	0	0	0	0	0	1	1	0	0	0	0	0	0	0	1
0	0	1	0	0	4627	0	3.50137	0	0	0	0	0	0	1	1	0	0	0	0	0	0	0	1
0	0	1	0	0	4631	0	1.89863	0	0	0	0	15	1	1	1	0	0	0	0	0	0	0	1
0	0	1	0	0	4645	0	4.88493	0	0	0	0	0	0	1	1	0	0	0	0	0	0	0	1
0	0	1	0	0	4654	0	4.09589	0	0	0	0	11.6667	1	1	1	0	0	0	0	0	0	0	1
0	0	1	0	0	4657	0	2.31507	0	0	0	0	6.59091	1	1	1	0	0	0	0	0	0	0	1
0	0	1	0	0	4662	0	3.59178	0	0	0	0	33.5714	1	1	1	0	0	0	0	0	0	0	1
0	0	1	0	0	4671	0	0.361644	0	0	0	0	0	0	1	0.361644	0	0	0	0	0	0	0	1
0	0	1	0	0	4684	0	5.20548	0	0	0	0	0	0	1	1	0	0	0	0	0	0	0	1
0	0	1	0	0	4690	0	5.20822	1	0	0	1	5.71429	1	2	1	0	0	0	0	0	0	0	1
0	0	1	0	0	4699	0	0.189041	0	0	0	0	0	0	1	0.189041	0	0	0	0	0	0	0	1
0	0	1	0	0	4712	0	0.643836	0	0	0	0	0	0	1	0.643836	0	0	0	0	0	0	0	1
0	0	1	0	0	4713	0	5.91781	0	0	0	0	3.75	1	1	1	0	0	0	0	0	0	0	1
0	0	1	0	0	4718	0	5.60822	0	0	0	0	7.54717	1	1	1	0	0	0	0	0	0	0	1
0	0	1	0	0	4726	0	3.71507	0	0	0	0	61.6667	1	1	1	0	0	0	0	0	0	0	1
0	0	1	0	0	4740	0	1.19726	0	0	0	0	0	0	1	1	0	0	0	0	0	0	0	1
0	0	1	0	0	4754	0	1.24384	0	0	0	0	0	0	1	1	0	0	0	0	0	0	0	1
0	0	1	0	0	4772	0	3.96986	0	0	0	0	0	0	1	1	0	0	0	0	0	0	0	1
0	0	1	0	0	4774	0	3.38904	0	0	0	0	0	0	1	1	0	0	0	0	0	0	0	1
0	0	1	0	0	4781	0	4.75616	0	0	0	0	22.5	1	1	1	0	0	0	0	0	0	0	1
0	0	1	0	0	4797	0	4.46027	0	0	0	0	46.25	1	1	1	0	0	0	0	0	0	0	1
0	0	1	0	0	4801	0	4.66027	0	0	0	0	35	1	1	1	0	0	0	0	0	0	0	1
0	0	1	0	0	4804	0	3.7726	0	0	0	0	42.8333	1	1	1	0	0	0	0	0	0	0	1
0	0	1	0	0	4807	0	0.687671	0	0	0	0	0	0	1	0.687671	0	0	0	0	0	0	0	1
0	0	1	0	0	4810	0	5.09041	0	0	0	0	0	0	1	1	0	0	0	0	0	0	0	1
0	0	1	0	0	4825	0	1.87123	0	0	0	0	0	0	1	1	0	0	0	0	0	0	0	1
0	0	1	0	0	4839	0	2.24384	0	0	0	0	2	1	1	1	0	0	0	0	0	0	0	1
0	0	1	0	0	4846	0	3.39178	0	0	0	0	0	0	1	1	0	0	0	0	0	0	0	1
0	0	1	0	0	4847	0	1.10137	0	0	0	0	0	0	1	1	0	0	0	0	0	0	0	1
0	0	1	0	0	4854	0	5.47945	0	0	0	0	25.5	1	1	1	0	0	0	0	0	0	0	1
0	0	1	0	0	4893	0	1.3863	0	0	0	0	0	0	1	1	0	0	0	0	0	0	0	1
0	0	1	0	0	4899	0	4.51781	0	0	0	0	0	0	1	1	0	0	0	0	0	0	0	1
0	0	1	0	0	4901	0	5.32603	0	0	0	0	5	1	1	1	0	0	0	0	0	0	0	1
0	0	1	0	0	4908	0	0.512329	0	0	0	0	0	0	1	0.512329	0	0	0	0	0	0	0	1
0	0	1	0	0	4938	0	1.91507	0	0	0	0	7.5	1	1	1	0	0	0	0	0	0	0	1
0	0	1	0	0	4941	0	3.31781	0	0	0	0	7.5	1	1	1	0	0	0	0	0	0	0	1
0	0	1	0	0	4950	0	5.89589	1	1	0	1	32.1638	1	2	1	0	0	0	0	0	0	0	1
0	0	1	0	0	4962	0	1.46301	0	0	0	0	0	0	1	1	0	0	0	0	0	0	0	1
0	0	1	0	0	4977	0	5.79726	0	0	0	0	0	0	1	1	0	0	0	0	0	0	0	1
0	0	1	0	0	4978	0	1.20274	0	0	0	0	0	0	1	1	0	0	0	0	0	0	0	1
0	0	1	0	0	4991	0	3.18356	0	0	0	0	62.5672	1	1	1	0	0	0	0	0	0	0	1
0	0	1	0	0	4992	0	4.12329	0	0	0	0	0	0	1	1	0	0	0	0	0	0	0	1
0	0	1	0	0	5011	0	4.5589	0	0	0	0	0	0	1	1	0	0	0	0	0	0	0	1
0	0	1	0	0	5012	0	2.1726	0	0	0	0	0	0	1	1	0	0	0	0	0	0	0	1
0	0	1	0	0	5020	0	3.30959	0	0	0	0	11.992	1	1	1	0	0	0	0	0	0	0	1
0	0	1	0	0	5025	0	4.35342	1	0	0	1	12.1212	1	2	1	0	0	0	0	0	0	0	1
0	0	1	0	0	5037	0	3.55616	0	0	0	0	10	1	1	1	0	0	0	0	0	0	0	1
0	0	1	0	0	5058	0	4.61644	0	0	0	0	7.5	1	1	1	0	0	0	0	0	0	0	1
0	0	1	0	0	5059	0	3.5863	0	1	0	1	0	0	2	1	0	0	0	0	0	0	0	1
0	0	1	0	0	5080	0	2.83836	0	0	0	0	20	1	1	1	0	0	0	0	0	0	0	1
0	0	1	0	0	5081	0	0.534247	0	0	0	0	0	0	1	0.534247	0	0	0	0	0	0	0	1
0	0	1	0	0	5088	0	0.99726	0	0	0	0	0	0	1	0.99726	0	0	0	0	0	0	0	1
0	0	1	0	0	5103	0	1.86849	0	0	0	0	0	0	1	1	0	0	0	0	0	0	0	1
0	0	1	0	0	5104	0	1.7589	0	0	0	0	0	0	1	1	0	0	0	0	0	0	0	1
0	0	1	0	0	5106	0	3.70959	0	0	0	0	0	0	1	1	0	0	0	0	0	0	0	1
0	0	1	0	0	5122	0	3.5863	0	0	0	0	0	0	1	1	0	0	0	0	0	0	0	1
0	0	1	0	0	5124	0	5.4274	0	0	0	0	39.4444	1	1	1	0	0	0	0	0	0	0	1
0	0	1	0	0	5125	0	5.36164	0	0	0	0	30	1	1	1	0	0	0	0	0	0	0	1
0	0	1	0	0	5151	0	3.34795	0	0	0	0	0	0	1	1	0	0	0	0	0	0	0	1
0	0	1	0	0	5173	0	3.71233	0	0	0	0	0	0	1	1	0	0	0	0	0	0	0	1
0	0	1	0	0	5174	0	3.7589	0	0	0	0	30	1	1	1	0	0	0	0	0	0	0	1
0	0	1	0	0	5175	0	5.0411	0	0	0	0	15	1	1	1	0	0	0	0	0	0	0	1
0	0	1	0	0	5182	0	0.832877	0	0	0	0	0	0	1	0.832877	0	0	0	0	0	0	0	1
0	0	1	0	0	5187	0	3.96164	0	0	0	0	0	0	1	1	0	0	0	0	0	0	0	1
0	0	1	0	0	5196	0	3.66301	0	0	0	0	0	0	1	1	0	0	0	0	0	0	0	1
0	0	1	0	0	5212	0	2.01918	0	0	0	0	0	0	1	1	0	0	0	0	0	0	0	1
0	0	1	0	0	5219	0	1.19452	0	0	0	0	0	0	1	1	0	0	0	0	0	0	0	1
0	0	1	0	0	5221	0	0.339726	0	0	0	0	0	0	1	0.339726	0	0	0	0	0	0	0	1
0	0	1	0	0	5244	0	0.29863	0	0	0	0	0	0	1	0.29863	0	0	0	0	0	0	0	1
0	0	1	0	0	5245	0	5.61918	1	1	0	1	10.614	1	2	1	0	0	0	0	0	0	0	1
0	0	1	0	0	5248	0	3.88219	0	0	0	0	32.5025	1	1	1	0	0	0	0	0	0	0	1
0	0	1	0	0	5252	0	3.42466	0	0	0	0	20	1	1	1	0	0	0	0	0	0	0	1
0	0	1	0	0	5262	0	2.43288	0	0	0	0	0	0	1	1	0	0	0	0	0	0	0	1
0	0	1	0	0	5264	0	2.69589	0	0	0	0	0	0	1	1	0	0	0	0	0	0	0	1
0	0	1	0	0	5274	0	1.41096	0	0	0	0	7.5	1	1	1	0	0	0	0	0	0	0	1
0	0	1	0	0	5277	0	0.460274	0	0	0	0	0	0	1	0.460274	0	0	0	0	0	0	0	1
0	0	1	0	0	5281	0	2.93425	0	0	0	0	7.14286	1	1	1	0	0	0	0	0	0	0	1
0	0	1	0	0	5286	0	0.550685	0	0	0	0	0	0	1	0.550685	0	0	0	0	0	0	0	1
0	0	1	0	0	5288	0	5.55342	0	1	0	1	23.3562	1	2	1	0	0	0	0	0	0	0	1
0	0	1	0	0	5299	0	0.909589	0	0	0	0	0	0	1	0.909589	0	0	0	0	0	0	0	1
0	0	1	0	0	5310	0	3.39178	0	0	0	0	0	0	1	1	0	0	0	0	0	0	0	1
0	0	1	0	0	5321	0	5.21096	0	0	1	1	17.8378	1	2	1	0	0	0	0	0	0	0	1
0	0	1	0	0	5322	0	4.76438	0	0	0	0	0	0	1	1	0	0	0	0	0	0	0	1
0	0	1	0	0	5357	0	4.82466	0	0	0	0	5	1	1	1	0	0	0	0	0	0	0	1
0	0	1	0	0	5375	0	2.46027	0	0	0	0	8	1	1	1	0	0	0	0	0	0	0	1
0	0	1	0	0	5380	0	3.38904	0	0	0	0	0	0	1	1	0	0	0	0	0	0	0	1
0	0	1	0	0	5381	0	4.67945	0	0	0	0	15	1	1	1	0	0	0	0	0	0	0	1
0	0	1	0	0	5385	0	1.64658	0	0	0	0	0	0	1	1	0	0	0	0	0	0	0	1
0	0	1	0	0	5404	0	4.82192	0	0	0	0	7.5	1	1	1	0	0	0	0	0	0	0	1
0	0	1	0	0	5409	0	4.31507	1	0	0	1	6.76471	1	2	1	0	0	0	0	0	0	0	1
0	0	1	0	0	5411	0	5.38904	0	0	0	0	0	0	1	1	0	0	0	0	0	0	0	1
0	0	1	0	0	5414	0	5.4274	0	0	0	0	0	0	1	1	0	0	0	0	0	0	0	1
0	0	1	0	0	5415	0	1.66575	0	0	0	0	15	1	1	1	0	0	0	0	0	0	0	1
0	0	1	0	0	5418	0	4.81918	0	0	0	0	0	0	1	1	0	0	0	0	0	0	0	1
0	0	1	0	0	5428	0	0.191781	0	0	0	0	0	0	1	0.191781	0	0	0	0	0	0	0	1
0	0	1	0	0	5432	0	5.69315	0	0	0	0	0	0	1	1	0	0	0	0	0	0	0	1
0	0	1	0	0	5435	0	2.45479	0	0	0	0	0	0	1	1	0	0	0	0	0	0	0	1
0	0	1	0	0	5439	0	0.19726	0	0	0	0	0	0	1	0.19726	0	0	0	0	0	0	0	1
0	0	1	0	0	5444	0	5.25205	0	0	0	0	0	0	1	1	0	0	0	0	0	0	0	1
0	0	1	0	0	5449	0	0.786301	0	0	0	0	0	0	1	0.786301	0	0	0	0	0	0	0	1
0	0	1	0	0	5466	0	1.2137	0	0	0	0	0	0	1	1	0	0	0	0	0	0	0	1
0	0	1	0	0	5479	0	5.19726	0	0	0	0	10.1744	1	1	1	0	0	0	0	0	0	0	1
0	0	1	0	0	5517	0	3.00548	0	0	0	0	0	0	1	1	0	0	0	0	0	0	0	1
0	0	1	0	0	5520	0	4.06027	0	0	0	0	8.75	1	1	1	0	0	0	0	0	0	0	1
0	0	1	0	0	5532	0	2.63562	0	0	0	0	6	1	1	1	0	0	0	0	0	0	0	1
0	0	1	0	0	5535	0	5.90137	0	0	0	0	88.3333	1	1	1	0	0	0	0	0	0	0	1
0	0	1	0	0	5542	0	5.26301	0	0	0	0	0	0	1	1	0	0	0	0	0	0	0	1
0	0	1	0	0	5569	0	2.78904	0	0	0	0	0	0	1	1	0	0	0	0	0	0	0	1
0	0	1	0	0	5575	0	0.632877	0	0	0	0	0	0	1	0.632877	0	0	0	0	0	0	0	1
0	0	1	0	0	5590	0	0.783562	0	0	0	0	0	0	1	0.783562	0	0	0	0	0	0	0	1
0	0	1	0	0	5592	0	5.4411	0	0	0	0	0	0	1	1	0	0	0	0	0	0	0	1
0	0	1	0	0	5596	0	5.13425	0	0	0	0	2.85714	1	1	1	0	0	0	0	0	0	0	1
0	0	1	0	0	5597	0	3.56712	0	0	0	0	0	0	1	1	0	0	0	0	0	0	0	1
0	0	1	0	0	5612	0	5.88767	0	0	0	0	15	1	1	1	0	0	0	0	0	0	0	1
0	0	1	0	0	5639	0	0.736986	0	0	0	0	0	0	1	0.736986	0	0	0	0	0	0	0	1
0	0	1	0	0	5652	0	4.67945	0	0	0	0	8.33333	1	1	1	0	0	0	0	0	0	0	1
0	0	1	0	0	5661	0	4.23288	0	0	0	0	0	0	1	1	0	0	0	0	0	0	0	1
0	0	1	0	0	5664	0	1.10411	0	0	0	0	0	0	1	1	0	0	0	0	0	0	0	1
0	0	1	0	0	5672	0	1.20822	0	0	0	0	0	0	1	1	0	0	0	0	0	0	0	1
0	0	1	0	0	5691	0	4.24658	1	1	0	1	137.909	1	2	1	0	0	0	0	0	0	0	1
0	0	1	0	0	5693	0	3.20274	0	0	0	0	12.5	1	1	1	0	0	0	0	0	0	0	1
0	0	1	0	0	5699	0	0.821918	0	0	0	0	0	0	1	0.821918	0	0	0	0	0	0	0	1
0	0	1	0	0	5703	0	4.20822	0	0	0	0	0	0	1	1	0	0	0	0	0	0	0	1
0	0	1	0	0	5707	0	1.35068	0	0	0	0	0	0	1	1	0	0	0	0	0	0	0	1
0	0	1	0	0	5712	0	4.4	1	0	0	1	15.8974	1	2	1	0	0	0	0	0	0	0	1
0	0	1	0	0	5714	0	4.70959	0	0	0	0	0	0	1	1	0	0	0	0	0	0	0	1
0	0	1	0	0	5716	0	0.282192	0	0	0	0	0	0	1	0.282192	0	0	0	0	0	0	0	1
0	0	1	0	0	5720	0	2.88493	0	0	0	0	16.1012	1	1	1	0	0	0	0	0	0	0	1
0	0	1	0	0	5729	0	3.47945	0	0	0	0	11.9048	1	1	1	0	0	0	0	0	0	0	1
0	0	1	0	0	5732	0	3.54521	0	0	0	0	10	1	1	1	0	0	0	0	0	0	0	1
0	0	1	0	0	5740	0	1.16164	0	0	0	0	0	0	1	1	0	0	0	0	0	0	0	1
0	0	1	0	0	5741	0	5.19452	0	1	0	1	0	0	2	1	0	0	0	0	0	0	0	1
0	0	1	0	0	5747	0	5.76986	0	0	0	0	2.5	1	1	1	0	0	0	0	0	0	0	1
0	0	1	0	0	5749	0	2.60274	0	0	0	0	0	0	1	1	0	0	0	0	0	0	0	1
0	0	1	0	0	5753	0	2.25753	1	0	0	1	33.3333	1	2	1	0	0	0	0	0	0	0	1
0	0	1	0	0	5754	0	5.24932	0	0	0	0	31.25	1	1	1	0	0	0	0	0	0	0	1
0	0	1	0	0	5768	0	1.95342	0	0	0	0	0	0	1	1	0	0	0	0	0	0	0	1
0	0	1	0	0	5780	0	4.65479	0	0	0	0	16.6176	1	1	1	0	0	0	0	0	0	0	1
0	0	1	0	0	5786	0	1.49315	0	0	0	0	0	0	1	1	0	0	0	0	0	0	0	1
0	0	1	0	0	5796	0	2.64658	0	1	0	1	15	1	2	1	0	0	0	0	0	0	0	1
0	0	1	0	0	5806	0	2.85479	0	0	0	0	0	0	1	1	0	0	0	0	0	0	0	1
0	0	1	0	0	5820	0	1.6	0	0	0	0	5.625	1	1	1	0	0	0	0	0	0	0	1
0	0	1	0	0	5821	0	1.09315	0	0	0	0	0	0	1	1	0	0	0	0	0	0	0	1
0	0	1	0	0	5826	0	4.83288	0	0	0	0	5	1	1	1	0	0	0	0	0	0	0	1
0	0	1	0	0	5834	0	4.82466	0	0	0	0	31.7308	1	1	1	0	0	0	0	0	0	0	1
0	0	1	0	0	5835	0	5.59726	0	0	0	0	18.6741	1	1	1	0	0	0	0	0	0	0	1
0	0	1	0	0	5852	0	0.115068	0	0	0	0	0	0	1	0.115068	0	0	0	0	0	0	0	1
0	0	1	0	0	5856	0	3.64384	0	0	0	0	22.5	1	1	1	0	0	0	0	0	0	0	1
0	0	1	0	0	5859	0	2.40822	0	0	0	0	0	0	1	1	0	0	0	0	0	0	0	1
0	0	1	0	0	5882	0	1.20548	0	0	0	0	5	1	1	1	0	0	0	0	0	0	0	1
0	0	1	0	0	5885	0	2.37808	0	0	0	0	0	0	1	1	0	0	0	0	0	0	0	1
0	0	1	0	0	5889	0	2.32603	0	0	0	0	10	1	1	1	0	0	0	0	0	0	0	1
0	0	1	0	0	5894	0	3.94247	0	0	0	0	0	0	1	1	0	0	0	0	0	0	0	1
0	0	1	0	0	5903	0	1.24658	0	0	0	0	0	0	1	1	0	0	0	0	0	0	0	1
0	0	1	0	0	5906	0	2.65753	0	0	0	0	0	0	1	1	0	0	0	0	0	0	0	1
0	0	1	0	0	5918	0	4.5726	0	0	0	0	0	0	1	1	0	0	0	0	0	0	0	1
0	0	1	0	0	5922	0	2.93425	0	0	0	0	0	0	1	1	0	0	0	0	0	0	0	1
0	0	1	0	0	5936	0	4.11507	0	0	0	0	0	0	1	1	0	0	0	0	0	0	0	1
0	0	1	0	0	5945	0	5.55616	0	0	0	0	0	0	1	1	0	0	0	0	0	0	0	1
0	0	1	0	0	5955	0	0.526027	0	0	0	0	0	0	1	0.526027	0	0	0	0	0	0	0	1
0	0	1	0	0	5957	0	3.90411	0	0	0	0	11.5319	1	1	1	0	0	0	0	0	0	0	1
0	0	1	0	0	5961	0	3.67671	0	0	0	0	0	0	1	1	0	0	0	0	0	0	0	1
0	0	1	0	0	5965	0	0.241096	0	0	0	0	0	0	1	0.241096	0	0	0	0	0	0	0	1
0	0	1	0	0	5967	0	1.11233	0	0	0	0	0	0	1	1	0	0	0	0	0	0	0	1
0	0	1	0	0	5974	0	3.62466	0	0	0	0	0	0	1	1	0	0	0	0	0	0	0	1
0	0	1	0	0	5996	0	0.49863	0	0	0	0	0	0	1	0.49863	0	0	0	0	0	0	0	1
0	0	1	0	0	6005	0	2.92329	0	0	0	0	0	0	1	1	0	0	0	0	0	0	0	1
0	0	1	0	0	6012	0	3.06301	0	0	0	0	0	0	1	1	0	0	0	0	0	0	0	1
0	0	1	0	0	6016	0	5.42466	0	0	0	0	4.70588	1	1	1	0	0	0	0	0	0	0	1
0	0	1	0	0	6028	0	2.91507	0	0	0	0	0	0	1	1	0	0	0	0	0	0	0	1
0	0	1	0	0	6035	0	4.53425	0	0	0	0	10	1	1	1	0	0	0	0	0	0	0	1
0	0	1	0	0	6041	0	4.99726	0	0	0	0	100	1	1	1	0	0	0	0	0	0	0	1
0	0	1	0	0	6044	0	1.83836	0	0	0	0	0	0	1	1	0	0	0	0	0	0	0	1
0	0	1	0	0	6048	0	4.28767	0	0	0	0	0	0	1	1	0	0	0	0	0	0	0	1
0	0	1	0	0	6074	0	1.93699	0	0	0	0	0	0	1	1	0	0	0	0	0	0	0	1
0	0	1	0	0	6099	0	3.86027	0	0	0	0	12	1	1	1	0	0	0	0	0	0	0	1
0	0	1	0	0	6120	0	0.657534	0	0	0	0	0	0	1	0.657534	0	0	0	0	0	0	0	1
0	0	1	0	0	6123	0	3.99452	0	0	0	0	15	1	1	1	0	0	0	0	0	0	0	1
0	0	1	0	0	6141	0	0.320548	0	0	0	0	0	0	1	0.320548	0	0	0	0	0	0	0	1
0	0	1	0	0	6142	0	0.761644	0	0	0	0	0	0	1	0.761644	0	0	0	0	0	0	0	1
0	0	1	0	0	6145	0	0.30137	0	0	0	0	0	0	1	0.30137	0	0	0	0	0	0	0	1
0	0	1	0	0	6147	0	3.82466	0	1	0	1	5.31746	1	2	1	0	0	0	0	0	0	0	1
0	0	1	0	0	6154	0	3.67123	0	0	0	0	0	0	1	1	0	0	0	0	0	0	0	1
0	0	1	0	0	6158	0	0.553425	0	0	0	0	0	0	1	0.553425	0	0	0	0	0	0	0	1
0	0	1	0	0	6161	0	5.99178	0	0	0	0	0	0	1	1	0	0	0	0	0	0	0	1
0	0	1	0	0	6170	0	4.6411	0	1	0	1	7.62295	1	2	1	0	0	0	0	0	0	0	1
0	0	1	0	0	6171	0	3.14247	0	0	0	0	0	0	1	1	0	0	0	0	0	0	0	1
0	0	1	0	0	6203	0	0.263014	0	0	0	0	0	0	1	0.263014	0	0	0	0	0	0	0	1
0	0	1	0	0	6215	0	1.18904	0	0	0	0	0	0	1	1	0	0	0	0	0	0	0	1
0	0	1	0	0	6233	0	1.36986	0	0	0	0	0	0	1	1	0	0	0	0	0	0	0	1
0	0	1	0	0	6234	0	0.594521	0	0	0	0	0	0	1	0.594521	0	0	0	0	0	0	0	1
0	0	1	0	0	6235	0	0.030137	0	0	0	0	0	0	1	0.030137	0	0	0	0	0	0	0	1
0	0	1	0	0	6240	0	2.06301	0	0	0	0	0	0	1	1	0	0	0	0	0	0	0	1
0	0	1	0	0	6241	0	3.62466	0	0	0	0	0	0	1	1	0	0	0	0	0	0	0	1
0	0	1	0	0	6243	0	0.843836	0	0	0	0	0	0	1	0.843836	0	0	0	0	0	0	0	1
0	0	1	0	0	6245	0	1.67945	0	0	0	0	0	0	1	1	0	0	0	0	0	0	0	1
0	0	1	0	0	6250	0	2.65753	0	0	0	0	0	0	1	1	0	0	0	0	0	0	0	1
0	0	1	0	0	6268	0	3.35342	0	0	0	0	0	0	1	1	0	0	0	0	0	0	0	1
0	0	1	0	0	6274	0	2.31781	0	0	0	0	0	0	1	1	0	0	0	0	0	0	0	1
0	0	1	0	0	6275	0	4.40548	0	1	0	1	0	0	2	1	0	0	0	0	0	0	0	1
0	0	1	0	0	6288	0	0.0575342	0	0	0	0	0	0	1	0.0575342	0	0	0	0	0	0	0	1
0	0	1	0	0	6315	0	0.906849	0	0	0	0	0	0	1	0.906849	0	0	0	0	0	0	0	1
0	0	1	0	0	6316	0	3.85205	0	0	0	0	0	0	1	1	0	0	0	0	0	0	0	1
0	0	1	0	0	6333	0	4.02192	0	0	0	0	16.8182	1	1	1	0	0	0	0	0	0	0	1
0	0	1	0	0	6341	0	3.73973	0	0	0	0	0	0	1	1	0	0	0	0	0	0	0	1
0	0	1	0	0	6360	0	2.49315	0	0	0	0	10	1	1	1	0	0	0	0	0	0	0	1
0	0	1	0	0	6367	0	2.33151	0	0	0	0	8.33333	1	1	1	0	0	0	0	0	0	0	1
0	0	1	0	0	6382	0	0.813699	0	0	0	0	0	0	1	0.813699	0	0	0	0	0	0	0	1
0	0	1	0	0	6384	0	0.780822	0	0	0	0	0	0	1	0.780822	0	0	0	0	0	0	0	1
0	0	1	0	0	6385	0	2.43288	0	0	0	0	0	0	1	1	0	0	0	0	0	0	0	1
0	0	1	0	0	6389	0	3.5863	0	0	0	0	5.75	1	1	1	0	0	0	0	0	0	0	1
0	0	1	0	0	6396	0	0.441096	0	0	0	0	0	0	1	0.441096	0	0	0	0	0	0	0	1
0	0	1	0	0	6401	0	1.66301	0	0	0	0	0	0	1	1	0	0	0	0	0	0	0	1
0	0	1	0	0	6413	0	3.69315	0	0	0	0	0	0	1	1	0	0	0	0	0	0	0	1
0	0	1	0	0	6425	0	1.66575	0	0	0	0	0	0	1	1	0	0	0	0	0	0	0	1
0	0	1	0	0	6439	0	0.139726	0	0	0	0	0	0	1	0.139726	0	0	0	0	0	0	0	1
0	0	1	0	0	6446	0	2.06849	0	0	0	0	11.25	1	1	1	0	0	0	0	0	0	0	1
0	0	1	0	0	6451	0	5.69589	0	0	0	0	0	0	1	1	0	0	0	0	0	0	0	1
0	0	1	0	0	6471	0	0.652055	0	0	0	0	0	0	1	0.652055	0	0	0	0	0	0	0	1
0	0	1	0	0	6473	0	2.04932	0	0	0	0	0	0	1	1	0	0	0	0	0	0	0	1
0	0	1	0	0	6477	0	1.13973	0	0	0	0	0	0	1	1	0	0	0	0	0	0	0	1
0	0	1	0	0	6479	0	5.54247	0	0	0	0	5.58824	1	1	1	0	0	0	0	0	0	0	1
0	0	1	0	0	6485	0	4.11781	0	0	0	0	0	0	1	1	0	0	0	0	0	0	0	1
0	0	1	0	0	6514	0	1.04932	0	0	0	0	0	0	1	1	0	0	0	0	0	0	0	1
0	0	1	0	0	6519	0	3.36712	0	0	0	0	0	0	1	1	0	0	0	0	0	0	0	1
0	0	1	0	0	6535	0	2.52055	0	0	0	0	0	0	1	1	0	0	0	0	0	0	0	1
0	0	1	0	0	6541	0	1.31233	0	0	0	0	3.57143	1	1	1	0	0	0	0	0	0	0	1
0	0	1	0	0	6549	0	3.1589	0	0	0	0	188.571	1	1	1	0	0	0	0	0	0	0	1
0	0	1	0	0	6552	0	4.49589	0	0	0	0	0	0	1	1	0	0	0	0	0	0	0	1
0	0	0	0	0	3733	0	0.824658	0	0	0	0	0	0	0	0.824658	0	0	0	0	0	0	0	0
0	0	0	0	0	1055	0	1.93699	0	0	0	0	0	0	0	1	0	0	0	0	0	0	0	0
0	0	0	0	0	825	0	2.90959	0	0	0	0	15	1	0	1	0	0	0	0	0	0	0	0
0	0	0	0	0	2733	0	1.7726	0	0	0	0	0	0	0	1	0	0	0	0	0	0	0	0
0	0	0	0	0	4293	0	2.79726	0	0	0	0	0	0	0	1	0	0	0	0	0	0	0	0
0	0	0	0	0	4616	0	4.73699	0	0	0	0	0	0	0	1	0	0	0	0	0	0	0	0
0	0	0	0	0	3262	0	4.91507	0	0	0	0	7.5	1	0	1	0	0	0	0	0	0	0	0
0	0	0	0	0	2050	0	2.90959	0	0	0	0	0	0	0	1	0	0	0	0	0	0	0	0
0	0	0	0	0	3033	0	2.96164	0	0	0	0	0	0	0	1	0	0	0	0	0	0	0	0
0	0	0	0	0	3557	0	0.99726	0	0	0	0	0	0	0	0.99726	0	0	0	0	0	0	0	0
0	0	0	0	0	2424	0	5.32603	0	0	0	0	20.8333	1	0	1	0	0	0	0	0	0	0	0
0	0	0	0	0	2019	0	0.983562	0	0	0	0	0	0	0	0.983562	0	0	0	0	0	0	0	0
0	0	0	0	0	1901	0	3.98904	0	0	0	0	0	0	0	1	0	0	0	0	0	0	0	0
0	0	0	0	0	2973	0	3.93973	0	0	0	0	7.5	1	0	1	0	0	0	0	0	0	0	0
0	0	0	0	0	6235	0	0.994521	0	0	0	0	0	0	0	0.994521	0	0	0	0	0	0	0	0
0	0	0	0	0	4551	0	2.99726	0	0	0	0	0	0	0	1	0	0	0	0	0	0	0	0
0	0	0	0	0	3253	0	3.9726	0	0	0	0	0	0	0	1	0	0	0	0	0	0	0	0
0	0	0	0	0	1305	0	4.99178	0	0	0	0	0	0	0	1	0	0	0	0	0	0	0	0
0	0	0	0	0	4797	0	4.94521	0	0	0	0	0	0	0	1	0	0	0	0	0	0	0	0
0	0	0	0	0	306	0	4.90685	0	0	0	0	0	0	0	1	0	0	0	0	0	0	0	0
0	0	0	0	0	4595	0	4.87123	0	0	0	0	0	0	0	1	0	0	0	0	0	0	0	0
0	0	0	0	0	2599	0	0.964384	0	0	0	0	0	0	0	0.964384	0	0	0	0	0	0	0	0
0	0	0	0	0	3068	0	1.95616	0	0	0	0	0	0	0	1	0	0	0	0	0	0	0	0
0	0	0	0	0	4075	0	5.41918	0	0	0	0	0	0	0	1	0	0	0	0	0	0	0	0
0	0	0	0	0	1316	0	1.56164	0	0	0	0	0	0	0	1	0	0	0	0	0	0	0	0
0	0	0	0	0	5306	0	3.16164	0	0	0	0	0	0	0	1	0	0	0	0	0	0	0	0
0	0	0	0	0	2153	0	3.65479	0	0	0	0	0	0	0	1	0	0	0	0	0	0	0	0
0	0	0	0	0	4208	0	5.70411	0	0	0	0	45.7143	1	0	1	0	0	0	0	0	0	0	0
0	0	0	0	0	5084	0	3.9589	0	0	0	0	0	0	0	1	0	0	0	0	0	0	0	0
0	0	0	0	0	2166	0	4.98082	0	0	0	0	0	0	0	1	0	0	0	0	0	0	0	0
0	0	0	0	0	1188	0	4.67671	0	0	0	0	0	0	0	1	0	0	0	0	0	0	0	0
0	0	0	0	0	4610	0	1.87123	0	0	0	0	0	0	0	1	0	0	0	0	0	0	0	0
0	0	0	0	0	6502	0	0.380822	0	0	0	0	0	0	0	0.380822	0	0	0	0	0	0	0	0
0	0	0	0	0	3215	0	3.98904	0	0	0	0	0	0	0	1	0	0	0	0	0	0	0	0
0	0	0	0	0	361	0	4.95616	0	0	0	0	0	0	0	1	0	0	0	0	0	0	0	0
0	0	0	0	0	68	0	5	0	0	0	0	0	0	0	1	0	0	0	0	0	0	0	0
0	0	0	0	0	6041	0	4.87671	0	0	0	0	0	0	0	1	0	0	0	0	0	0	0	0
0	0	0	0	0	4460	0	4.72603	0	0	0	0	15	1	0	1	0	0	0	0	0	0	0	0
0	0	0	0	0	4078	0	1.97534	0	0	0	0	0	0	0	1	0	0	0	0	0	0	0	0
0	0	0	0	0	4009	0	0.989041	0	0	0	0	0	0	0	0.989041	0	0	0	0	0	0	0	0
0	0	0	0	0	3396	0	3.83288	0	0	0	0	0	0	0	1	0	0	0	0	0	0	0	0
0	0	0	0	0	1368	0	5.99178	0	0	0	0	32.3418	1	0	1	0	0	0	0	0	0	0	0
0	0	0	0	0	1363	0	3.9589	0	0	0	0	33.3333	1	0	1	0	0	0	0	0	0	0	0
0	0	0	0	0	5974	0	3.93699	0	0	0	0	7.5	1	0	1	0	0	0	0	0	0	0	0
0	0	0	0	0	4528	0	4.53425	0	0	0	0	0	0	0	1	0	0	0	0	0	0	0	0
0	0	0	0	0	476	0	3.72877	0	0	0	0	15	1	0	1	0	0	0	0	0	0	0	0
0	0	0	0	0	887	0	1.88767	0	0	0	0	0	0	0	1	0	0	0	0	0	0	0	0
0	0	0	0	0	2980	0	3.90959	0	0	0	0	0	0	0	1	0	0	0	0	0	0	0	0
0	0	0	0	0	3597	0	5.99178	0	0	0	0	0	0	0	1	0	0	0	0	0	0	0	0
0	0	0	0	0	5294	0	0.920548	0	0	0	0	0	0	0	0.920548	0	0	0	0	0	0	0	0
0	0	0	0	0	5277	0	0.994521	0	0	0	0	0	0	0	0.994521	0	0	0	0	0	0	0	0
0	0	0	0	0	5308	0	4.97808	0	0	0	0	0	0	0	1	0	0	0	0	0	0	0	0
0	0	0	0	0	3263	0	0.657534	0	0	0	0	0	0	0	0.657534	0	0	0	0	0	0	0	0
0	0	0	0	0	3265	0	5.89315	0	0	0	0	7.125	1	0	1	0	0	0	0	0	0	0	0
0	0	0	0	0	3553	0	5.98356	0	0	0	0	15	1	0	1	0	0	0	0	0	0	0	0
0	0	0	0	0	4560	0	5.1589	0	0	0	0	0	0	0	1	0	0	0	0	0	0	0	0
0	0	0	0	0	4754	0	1.86027	0	0	0	0	0	0	0	1	0	0	0	0	0	0	0	0
0	0	0	0	0	5084	0	3.86849	0	0	0	0	0	0	0	1	0	0	0	0	0	0	0	0
0	0	0	0	0	6290	0	3.81644	0	0	0	0	0	0	0	1	0	0	0	0	0	0	0	0
0	0	0	0	0	3095	0	0.906849	0	0	0	0	0	0	0	0.906849	0	0	0	0	0	0	0	0
0	0	0	0	0	160	0	1.95616	0	0	0	0	0	0	0	1	0	0	0	0	0	0	0	0
0	0	0	0	0	5012	0	2.51233	0	0	0	0	0	0	0	1	0	0	0	0	0	0	0	0
0	0	0	0	0	5983	0	3.45205	0	0	0	0	0	0	0	1	0	0	0	0	0	0	0	0
0	0	0	0	0	5128	0	2.96438	0	0	0	0	0	0	0	1	0	0	0	0	0	0	0	0
0	0	0	0	0	4698	0	2.24384	0	0	0	0	42.1429	1	0	1	0	0	0	0	0	0	0	0
0	0	0	0	0	3441	0	0.567123	0	0	0	0	0	0	0	0.567123	0	0	0	0	0	0	0	0
0	0	0	0	0	1398	0	4.83288	0	0	0	0	0	0	0	1	0	0	0	0	0	0	0	0
0	0	0	0	0	2672	0	1.97534	0	0	0	0	0	0	0	1	0	0	0	0	0	0	0	0
0	0	0	0	0	2499	0	2.75342	0	0	0	0	0	0	0	1	0	0	0	0	0	0	0	0
0	0	0	0	0	1817	0	5.94521	0	0	0	0	0	0	0	1	0	0	0	0	0	0	0	0
0	0	0	0	0	138	0	0.852055	0	0	0	0	0	0	0	0.852055	0	0	0	0	0	0	0	0
0	0	0	0	0	4074	0	0.90137	0	0	0	0	0	0	0	0.90137	0	0	0	0	0	0	0	0
0	0	0	0	0	2235	0	1.97534	0	0	0	0	0	0	0	1	0	0	0	0	0	0	0	0
0	0	0	0	0	960	0	4.80822	0	0	0	0	5.625	1	0	1	0	0	0	0	0	0	0	0
0	0	0	0	0	1603	0	4.78904	0	0	0	0	0	0	0	1	0	0	0	0	0	0	0	0
0	0	0	0	0	2123	0	0.493151	0	0	0	0	0	0	0	0.493151	0	0	0	0	0	0	0	0
0	0	0	0	0	2561	0	4.95616	0	0	0	0	25.625	1	0	1	0	0	0	0	0	0	0	0
0	0	0	0	0	5612	0	5.58082	0	0	0	0	3.75	1	0	1	0	0	0	0	0	0	0	0
0	0	0	0	0	5461	0	4.89589	0	0	0	0	0	0	0	1	0	0	0	0	0	0	0	0
0	0	0	0	0	4089	0	3.49041	0	0	0	0	0	0	0	1	0	0	0	0	0	0	0	0
0	0	0	0	0	1274	0	5.95616	0	0	0	0	0	0	0	1	0	0	0	0	0	0	0	0
0	0	0	0	0	183	0	0.994521	0	0	0	0	0	0	0	0.994521	0	0	0	0	0	0	0	0
0	0	0	0	0	1364	0	4.32877	0	0	0	0	23.9583	1	0	1	0	0	0	0	0	0	0	0
0	0	0	0	0	548	0	1.19452	0	0	0	0	0	0	0	1	0	0	0	0	0	0	0	0
0	0	0	0	0	3343	0	1.98356	0	0	0	0	0	0	0	1	0	0	0	0	0	0	0	0
0	0	0	0	0	1410	0	2.66027	0	0	0	0	0	0	0	1	0	0	0	0	0	0	0	0
0	0	0	0	0	797	0	4.98356	0	0	0	0	15	1	0	1	0	0	0	0	0	0	0	0
0	0	0	0	0	2506	0	3.51507	0	0	0	0	0	0	0	1	0	0	0	0	0	0	0	0
0	0	0	0	0	5531	0	1.50959	0	0	0	0	0	0	0	1	0	0	0	0	0	0	0	0
0	0	0	0	0	441	0	1.9863	0	0	0	0	5	1	0	1	0	0	0	0	0	0	0	0
0	0	0	0	0	4208	0	5.97808	0	0	0	0	0	0	0	1	0	0	0	0	0	0	0	0
0	0	0	0	0	1754	0	3.58082	0	0	0	0	0	0	0	1	0	0	0	0	0	0	0	0
0	0	0	0	0	1797	0	5.98356	0	0	0	0	10.5	1	0	1	0	0	0	0	0	0	0	0
0	0	0	0	0	2493	0	2.91781	0	0	0	0	0	0	0	1	0	0	0	0	0	0	0	0
0	0	0	0	0	5037	0	3.97808	0	0	0	0	0	0	0	1	0	0	0	0	0	0	0	0
0	0	0	0	0	4238	0	1.99452	0	0	0	0	0	0	0	1	0	0	0	0	0	0	0	0
0	0	0	0	0	6366	0	5.65205	0	0	0	0	0	0	0	1	0	0	0	0	0	0	0	0
0	0	0	0	0	3259	0	3.98082	0	0	0	0	2.5	1	0	1	0	0	0	0	0	0	0	0
0	0	0	0	0	2333	0	2.93425	0	0	0	0	0	0	0	1	0	0	0	0	0	0	0	0
0	0	0	0	0	3587	0	3.53425	0	0	0	0	0	0	0	1	0	0	0	0	0	0	0	0
0	0	0	0	0	3642	0	3.94521	0	0	0	0	0	0	0	1	0	0	0	0	0	0	0	0
0	0	0	0	0	3216	0	3.95068	0	0	0	0	13.125	1	0	1	0	0	0	0	0	0	0	0
0	0	0	0	0	3988	0	2.93425	0	0	0	0	0	0	0	1	0	0	0	0	0	0	0	0
0	0	0	0	0	1477	0	3.96986	0	0	0	0	18.3333	1	0	1	0	0	0	0	0	0	0	0
0	0	0	0	0	3645	0	4.91507	0	0	0	0	853.333	1	0	1	0	0	0	0	0	0	0	0
0	0	0	0	0	6081	0	4.96712	0	0	0	0	10	1	0	1	0	0	0	0	0	0	0	0
0	0	0	0	0	4418	0	5.99452	0	0	0	0	23.3333	1	0	1	0	0	0	0	0	0	0	0
0	0	0	0	0	4064	0	5	0	0	0	0	15	1	0	1	0	0	0	0	0	0	0	0
0	0	0	0	0	4865	0	1.98082	0	0	0	0	10	1	0	1	0	0	0	0	0	0	0	0
0	0	0	0	0	4952	0	4.81096	0	0	0	0	0	0	0	1	0	0	0	0	0	0	0	0
0	0	0	0	0	4612	0	2.91507	0	0	0	0	0	0	0	1	0	0	0	0	0	0	0	0
0	0	0	0	0	3414	0	4.12055	0	0	0	0	0	0	0	1	0	0	0	0	0	0	0	0
0	0	0	0	0	5024	0	4.13699	0	0	0	0	15	1	0	1	0	0	0	0	0	0	0	0
0	0	0	0	0	5580	0	0.6	0	0	0	0	0	0	0	0.6	0	0	0	0	0	0	0	0
0	0	0	0	0	1932	0	5.45753	0	0	0	0	0	0	0	1	0	0	0	0	0	0	0	0
0	0	0	0	0	4174	0	1.5726	0	0	0	0	0	0	0	1	0	0	0	0	0	0	0	0
0	0	0	0	0	903	0	2.9589	0	0	0	0	0	0	0	1	0	0	0	0	0	0	0	0
0	0	0	0	0	5432	0	5.92603	0	0	0	0	23.4375	1	0	1	0	0	0	0	0	0	0	0
0	0	0	0	0	2461	0	4.73151	0	0	0	0	20	1	0	1	0	0	0	0	0	0	0	0
0	0	0	0	0	547	0	0.978082	0	0	0	0	0	0	0	0.978082	0	0	0	0	0	0	0	0
0	0	0	0	0	1049	0	3.99726	0	0	0	0	0	0	0	1	0	0	0	0	0	0	0	0
0	0	0	0	0	4208	0	5.92329	0	0	0	0	0	0	0	1	0	0	0	0	0	0	0	0
0	0	0	0	0	4250	0	0.879452	0	0	0	0	0	0	0	0.879452	0	0	0	0	0	0	0	0
0	0	0	0	0	3269	0	1.9726	0	0	0	0	0	0	0	1	0	0	0	0	0	0	0	0
0	0	0	0	0	421	0	5.79178	0	0	0	0	0	0	0	1	0	0	0	0	0	0	0	0
0	0	0	0	0	4272	0	1.89589	0	0	0	0	0	0	0	1	0	0	0	0	0	0	0	0
0	0	0	0	0	3625	0	4.96164	0	0	0	0	13.3333	1	0	1	0	0	0	0	0	0	0	0
0	0	0	0	0	681	0	3.96986	0	0	0	0	5.97222	1	0	1	0	0	0	0	0	0	0	0
0	0	0	0	0	1686	0	1.40548	0	0	0	0	0	0	0	1	0	0	0	0	0	0	0	0
0	0	0	0	0	3639	0	2.90685	0	0	0	0	0	0	0	1	0	0	0	0	0	0	0	0
0	0	0	0	0	5578	0	0.975342	0	0	0	0	0	0	0	0.975342	0	0	0	0	0	0	0	0
0	0	0	0	0	3428	0	2.7589	0	0	0	0	0	0	0	1	0	0	0	0	0	0	0	0
0	0	0	0	0	5011	0	4.97534	0	0	0	0	0	0	0	1	0	0	0	0	0	0	0	0
0	0	0	0	0	3024	0	4.99726	0	0	0	0	0	0	0	1	0	0	0	0	0	0	0	0
0	0	0	0	0	973	0	3.36712	0	0	0	0	0	0	0	1	0	0	0	0	0	0	0	0
0	0	0	0	0	990	0	2.25753	0	0	0	0	0	0	0	1	0	0	0	0	0	0	0	0
0	0	0	0	0	2445	0	0.726027	0	0	0	0	0	0	0	0.726027	0	0	0	0	0	0	0	0
0	0	0	0	0	405	0	2.41644	0	0	0	0	0	0	0	1	0	0	0	0	0	0	0	0
0	0	0	0	0	4367	0	4.90959	0	0	0	0	11.25	1	0	1	0	0	0	0	0	0	0	0
0	0	0	0	0	5747	0	5.68219	0	0	0	0	6.66667	1	0	1	0	0	0	0	0	0	0	0
0	0	0	0	0	2803	0	3.9863	0	0	0	0	0	0	0	1	0	0	0	0	0	0	0	0
0	0	0	0	0	335	0	2.72877	0	0	0	0	0	0	0	1	0	0	0	0	0	0	0	0
0	0	0	0	0	3890	0	3.99726	0	0	0	0	0	0	0	1	0	0	0	0	0	0	0	0
0	0	0	0	0	2951	0	0.969863	0	0	0	0	0	0	0	0.969863	0	0	0	0	0	0	0	0
0	0	0	0	0	608	0	0.824658	0	0	0	0	0	0	0	0.824658	0	0	0	0	0	0	0	0
0	0	0	0	0	5957	0	3.86301	0	0	0	0	0	0	0	1	0	0	0	0	0	0	0	0
0	0	0	0	0	5817	0	3.90959	0	0	0	0	0	0	0	1	0	0	0	0	0	0	0	0
0	0	0	0	0	4051	0	1.99178	0	0	0	0	0	0	0	1	0	0	0	0	0	0	0	0
0	0	0	0	0	3972	0	1.70685	0	0	0	0	0	0	0	1	0	0	0	0	0	0	0	0
0	0	0	0	0	3070	0	0.843836	0	0	0	0	0	0	0	0.843836	0	0	0	0	0	0	0	0
0	0	0	0	0	1119	0	3.87945	0	0	0	0	0	0	0	1	0	0	0	0	0	0	0	0
0	0	0	0	0	4465	0	0.950685	0	0	0	0	0	0	0	0.950685	0	0	0	0	0	0	0	0
0	0	0	0	0	2424	0	5.76438	0	0	0	0	0	0	0	1	0	0	0	0	0	0	0	0
0	0	0	0	0	6252	0	3.88219	0	0	0	0	10	1	0	1	0	0	0	0	0	0	0	0
0	0	0	0	0	1651	0	5.99178	0	0	0	0	7.5	1	0	1	0	0	0	0	0	0	0	0
0	0	0	0	0	616	0	5.99452	0	0	0	0	0	0	0	1	0	0	0	0	0	0	0	0
0	0	0	0	0	83	0	2.92603	0	0	0	0	15	1	0	1	0	0	0	0	0	0	0	0
0	0	0	0	0	2904	0	2.99178	0	0	0	0	20	1	0	1	0	0	0	0	0	0	0	0
0	0	0	0	0	2898	0	4.11507	0	0	0	0	0	0	0	1	0	0	0	0	0	0	0	0
0	0	0	0	0	5237	0	2.87397	0	0	0	0	0	0	0	1	0	0	0	0	0	0	0	0
0	0	0	0	0	903	0	2.93973	0	0	0	0	0	0	0	1	0	0	0	0	0	0	0	0
0	0	0	0	0	2166	0	5.00274	0	0	0	0	0	0	0	1	0	0	0	0	0	0	0	0
0	0	0	0	0	4879	0	2.8137	0	0	0	0	0	0	0	1	0	0	0	0	0	0	0	0
0	0	0	0	0	1797	0	5.94521	0	0	0	0	22.5	1	0	1	0	0	0	0	0	0	0	0
0	0	0	0	0	3237	0	6.00274	0	0	0	0	19	1	0	1	0	0	0	0	0	0	0	0
0	0	0	0	0	932	0	0.912329	0	0	0	0	0	0	0	0.912329	0	0	0	0	0	0	0	0
0	0	0	0	0	3967	0	1.34247	0	0	0	0	0	0	0	1	0	0	0	0	0	0	0	0
0	0	0	0	0	4317	0	2.85753	0	0	0	0	0	0	0	1	0	0	0	0	0	0	0	0
0	0	0	0	0	1034	0	3.50137	0	0	0	0	0	0	0	1	0	0	0	0	0	0	0	0
0	0	0	0	0	2168	0	1.61918	0	0	0	0	0	0	0	1	0	0	0	0	0	0	0	0
0	0	0	0	0	5750	0	4.88493	0	0	0	0	20	1	0	1	0	0	0	0	0	0	0	0
0	0	0	0	0	6525	0	4.96164	0	0	0	0	15	1	0	1	0	0	0	0	0	0	0	0
0	0	0	0	0	2603	0	1.70685	0	0	0	0	10	1	0	1	0	0	0	0	0	0	0	0
0	0	0	0	0	4191	0	2.89315	0	0	0	0	0	0	0	1	0	0	0	0	0	0	0	0
0	0	0	0	0	1447	0	2.98082	0	0	0	0	5	1	0	1	0	0	0	0	0	0	0	0
0	0	0	0	0	1146	0	5.92055	0	0	0	0	0	0	0	1	0	0	0	0	0	0	0	0
0	0	0	0	0	5079	0	2.84384	0	0	0	0	0	0	0	1	0	0	0	0	0	0	0	0
0	0	0	0	0	1460	0	1.95068	0	0	0	0	15	1	0	1	0	0	0	0	0	0	0	0
0	0	0	0	0	5414	0	5.99726	0	0	0	0	0	0	0	1	0	0	0	0	0	0	0	0
0	0	0	0	0	6258	0	4.82466	0	0	0	0	0	0	0	1	0	0	0	0	0	0	0	0
0	0	0	0	0	2967	0	2.62466	0	0	0	0	7.5	1	0	1	0	0	0	0	0	0	0	0
0	0	0	0	0	5357	0	4.97534	0	0	0	0	0	0	0	1	0	0	0	0	0	0	0	0
0	0	0	0	0	2883	0	3.98356	0	0	0	0	0	0	0	1	0	0	0	0	0	0	0	0
0	0	0	0	0	4456	0	0.00821918	0	0	0	0	0	0	0	0.00821918	0	0	0	0	0	0	0	0
0	0	0	0	0	5892	0	3.94521	0	0	0	0	0	0	0	1	0	0	0	0	0	0	0	0
0	0	0	0	0	6024	0	2.09863	0	0	0	0	0	0	0	1	0	0	0	0	0	0	0	0
0	0	0	0	0	1274	0	5.97534	0	0	0	0	24.1667	1	0	1	0	0	0	0	0	0	0	0
0	0	0	0	0	525	0	5.51507	0	0	0	0	0	0	0	1	0	0	0	0	0	0	0	0
0	0	0	0	0	2480	0	2.8	0	0	0	0	0	0	0	1	0	0	0	0	0	0	0	0
0	0	0	0	0	1377	0	2.90685	0	0	0	0	0	0	0	1	0	0	0	0	0	0	0	0
0	0	0	0	0	2068	0	5.92603	0	0	0	0	0	0	0	1	0	0	0	0	0	0	0	0
0	0	0	0	0	6524	0	5.80274	0	0	0	0	0	0	0	1	0	0	0	0	0	0	0	0
0	0	0	0	0	4992	0	4.92329	0	0	0	0	0	0	0	1	0	0	0	0	0	0	0	0
0	0	0	0	0	4657	0	2.96986	0	0	0	0	0	0	0	1	0	0	0	0	0	0	0	0
0	0	0	0	0	306	0	4.89041	0	0	0	0	25	1	0	1	0	0	0	0	0	0	0	0
0	0	0	0	0	341	0	1.80274	0	0	0	0	0	0	0	1	0	0	0	0	0	0	0	0
0	0	0	0	0	4654	0	5	0	0	0	0	7.5	1	0	1	0	0	0	0	0	0	0	0
0	0	0	0	0	1832	0	2.94795	0	0	0	0	13.5	1	0	1	0	0	0	0	0	0	0	0
0	0	0	0	0	247	0	4.90959	0	0	0	0	0	0	0	1	0	0	0	0	0	0	0	0
0	0	0	0	0	5889	0	2.75342	0	0	0	0	0	0	0	1	0	0	0	0	0	0	0	0
0	0	0	0	0	4645	0	4.63836	0	0	0	0	0	0	0	1	0	0	0	0	0	0	0	0
0	0	0	0	0	2228	0	0.210959	0	0	0	0	0	0	0	0.210959	0	0	0	0	0	0	0	0
0	0	0	0	0	5740	0	1.96986	0	0	0	0	0	0	0	1	0	0	0	0	0	0	0	0
0	0	0	0	0	920	0	3.88493	0	0	0	0	0	0	0	1	0	0	0	0	0	0	0	0
0	0	0	0	0	3033	0	2.64384	0	0	0	0	0	0	0	1	0	0	0	0	0	0	0	0
0	0	0	0	0	5148	0	3.96986	0	0	0	0	20	1	0	1	0	0	0	0	0	0	0	0
0	0	0	0	0	4701	0	2	0	0	0	0	0	0	0	1	0	0	0	0	0	0	0	0
0	0	0	0	0	3747	0	3.7726	0	0	0	0	0	0	0	1	0	0	0	0	0	0	0	0
0	0	0	0	0	3035	0	0.991781	0	0	0	0	0	0	0	0.991781	0	0	0	0	0	0	0	0
0	0	0	0	0	1965	0	0.89589	0	0	0	0	0	0	0	0.89589	0	0	0	0	0	0	0	0
0	0	0	0	0	267	0	1.93151	0	0	0	0	0	0	0	1	0	0	0	0	0	0	0	0
0	0	0	0	0	1978	0	4.73973	0	0	0	0	0	0	0	1	0	0	0	0	0	0	0	0
0	0	0	0	0	4421	0	6.00274	0	0	0	0	35	1	0	1	0	0	0	0	0	0	0	0
0	0	0	0	0	3217	0	0.923288	0	0	0	0	0	0	0	0.923288	0	0	0	0	0	0	0	0
0	0	0	0	0	3717	0	0.906849	0	0	0	0	0	0	0	0.906849	0	0	0	0	0	0	0	0
0	0	0	0	0	3024	0	4.68767	0	0	0	0	0	0	0	1	0	0	0	0	0	0	0	0
0	0	0	0	0	1134	0	3.88493	0	0	0	0	10	1	0	1	0	0	0	0	0	0	0	0
0	0	0	0	0	2611	0	4.9726	0	0	0	0	0	0	0	1	0	0	0	0	0	0	0	0
0	0	0	0	0	6401	0	1.96164	0	0	0	0	0	0	0	1	0	0	0	0	0	0	0	0
0	0	0	0	0	1962	0	5.72877	0	0	0	0	20	1	0	1	0	0	0	0	0	0	0	0
0	0	0	0	0	4230	0	3.90685	0	0	0	0	0	0	0	1	0	0	0	0	0	0	0	0
0	0	0	0	0	3229	0	4.97808	0	0	0	0	30	1	0	1	0	0	0	0	0	0	0	0
0	0	0	0	0	5961	0	3.96986	0	0	0	0	5	1	0	1	0	0	0	0	0	0	0	0
0	0	0	0	0	3677	0	4.85479	0	0	0	0	0	0	0	1	0	0	0	0	0	0	0	0
0	0	0	0	0	3127	0	2.93425	0	0	0	0	0	0	0	1	0	0	0	0	0	0	0	0
0	0	0	0	0	2796	0	4.87671	0	0	0	0	0	0	0	1	0	0	0	0	0	0	0	0
0	0	0	0	0	1410	0	2.94795	0	0	0	0	0	0	0	1	0	0	0	0	0	0	0	0
0	0	0	0	0	5483	0	1.93699	0	0	0	0	0	0	0	1	0	0	0	0	0	0	0	0
0	0	0	0	0	6096	0	4.99726	0	0	0	0	0	0	0	1	0	0	0	0	0	0	0	0
0	0	0	0	0	6292	0	0.947945	0	0	0	0	0	0	0	0.947945	0	0	0	0	0	0	0	0
0	0	0	0	0	3322	0	1.92329	0	0	0	0	0	0	0	1	0	0	0	0	0	0	0	0
0	0	0	0	0	1928	0	3.99726	0	0	0	0	0	0	0	1	0	0	0	0	0	0	0	0
0	0	0	0	0	2464	0	5.78356	0	0	0	0	0	0	0	1	0	0	0	0	0	0	0	0
0	0	0	0	0	973	0	3.93699	0	0	0	0	0	0	0	1	0	0	0	0	0	0	0	0
0	0	0	0	0	1937	0	3.9863	0	0	0	0	0	0	0	1	0	0	0	0	0	0	0	0
0	0	0	0	0	4258	0	0.70137	0	0	0	0	0	0	0	0.70137	0	0	0	0	0	0	0	0
0	0	0	0	0	6202	0	2.72877	0	0	0	0	0	0	0	1	0	0	0	0	0	0	0	0
0	0	0	0	0	3333	0	0.953425	0	0	0	0	0	0	0	0.953425	0	0	0	0	0	0	0	0
0	0	0	0	0	1599	0	2.63288	0	0	0	0	0	0	0	1	0	0	0	0	0	0	0	0
0	0	0	0	0	5405	0	4.98356	0	0	0	0	0	0	0	1	0	0	0	0	0	0	0	0
0	0	0	0	0	2373	0	0.953425	0	0	0	0	0	0	0	0.953425	0	0	0	0	0	0	0	0
0	0	0	0	0	6389	0	3.98356	0	0	0	0	0	0	0	1	0	0	0	0	0	0	0	0
0	0	0	0	0	4191	0	2.95068	0	0	0	0	0	0	0	1	0	0	0	0	0	0	0	0
0	0	0	0	0	1406	0	0.991781	0	0	0	0	0	0	0	0.991781	0	0	0	0	0	0	0	0
0	0	0	0	0	6361	0	1.87945	0	0	0	0	0	0	0	1	0	0	0	0	0	0	0	0
0	0	0	0	0	3378	0	4.9863	0	0	0	0	0	0	0	1	0	0	0	0	0	0	0	0
0	0	0	0	0	5800	0	1.81096	0	0	0	0	0	0	0	1	0	0	0	0	0	0	0	0
0	0	0	0	0	267	0	1.29315	0	0	0	0	0	0	0	1	0	0	0	0	0	0	0	0
0	0	0	0	0	4399	0	2.65753	0	0	0	0	0	0	0	1	0	0	0	0	0	0	0	0
0	0	0	0	0	5972	0	0.909589	0	0	0	0	0	0	0	0.909589	0	0	0	0	0	0	0	0
0	0	0	0	0	4443	0	0.99726	0	0	0	0	0	0	0	0.99726	0	0	0	0	0	0	0	0
0	0	0	0	0	986	0	0.843836	0	0	0	0	0	0	0	0.843836	0	0	0	0	0	0	0	0
0	0	0	0	0	5368	0	2.9726	0	0	0	0	0	0	0	1	0	0	0	0	0	0	0	0
0	0	0	0	0	421	0	5.76164	0	0	0	0	0	0	0	1	0	0	0	0	0	0	0	0
0	0	0	0	0	5851	0	2.77534	0	0	0	0	0	0	0	1	0	0	0	0	0	0	0	0
0	0	0	0	0	6164	0	3.84384	0	0	0	0	0	0	0	1	0	0	0	0	0	0	0	0
0	0	0	0	0	2996	0	2.46301	0	0	0	0	0	0	0	1	0	0	0	0	0	0	0	0
0	0	0	0	0	4612	0	2.83562	0	0	0	0	0	0	0	1	0	0	0	0	0	0	0	0
0	0	0	0	0	3537	0	2.93151	0	0	0	0	4.16667	1	0	1	0	0	0	0	0	0	0	0
0	0	0	0	0	181	0	4.64658	0	0	0	0	0	0	0	1	0	0	0	0	0	0	0	0
0	0	0	0	0	3710	0	2.9863	0	0	0	0	0	0	0	1	0	0	0	0	0	0	0	0
0	0	0	0	0	5961	0	3.9863	0	0	0	0	15	1	0	1	0	0	0	0	0	0	0	0
0	0	0	0	0	1150	0	1.80822	0	0	0	0	0	0	0	1	0	0	0	0	0	0	0	0
0	0	0	0	0	839	0	5.84658	0	0	0	0	0	0	0	1	0	0	0	0	0	0	0	0
0	0	0	0	0	1584	0	3.98082	0	0	0	0	0	0	0	1	0	0	0	0	0	0	0	0
0	0	0	0	0	4156	0	3.96438	0	0	0	0	0	0	0	1	0	0	0	0	0	0	0	0
0	0	0	0	0	4972	0	4.99452	0	0	0	0	21.9792	1	0	1	0	0	0	0	0	0	0	0
0	0	0	0	0	2904	0	2.91507	0	0	0	0	0	0	0	1	0	0	0	0	0	0	0	0
0	0	0	0	0	5104	0	1.92329	0	0	0	0	0	0	0	1	0	0	0	0	0	0	0	0
0	0	0	0	0	2750	0	1.97534	0	0	0	0	0	0	0	1	0	0	0	0	0	0	0	0
0	0	0	0	0	2654	0	2.98904	0	0	0	0	32.5	1	0	1	0	0	0	0	0	0	0	0
0	0	0	0	0	5674	0	0.917808	0	0	0	0	0	0	0	0.917808	0	0	0	0	0	0	0	0
0	0	0	0	0	5595	0	1.66849	0	0	0	0	0	0	0	1	0	0	0	0	0	0	0	0
0	0	0	0	0	6097	0	2.62466	0	0	0	0	0	0	0	1	0	0	0	0	0	0	0	0
0	0	0	0	0	4857	0	3.85205	0	0	0	0	0	0	0	1	0	0	0	0	0	0	0	0
0	0	0	0	0	1227	0	1.9863	0	0	0	0	0	0	0	1	0	0	0	0	0	0	0	0
0	0	0	0	0	4902	0	1.96986	0	0	0	0	0	0	0	1	0	0	0	0	0	0	0	0
0	0	0	0	0	2537	0	0.956164	0	0	0	0	0	0	0	0.956164	0	0	0	0	0	0	0	0
0	0	0	0	0	5611	0	5.97534	0	0	0	0	10	1	0	1	0	0	0	0	0	0	0	0
0	0	0	0	0	3441	0	0.586301	0	0	0	0	0	0	0	0.586301	0	0	0	0	0	0	0	0
0	0	0	0	0	1088	0	2.6274	0	0	0	0	0	0	0	1	0	0	0	0	0	0	0	0
0	0	0	0	0	2676	0	4.97534	0	0	0	0	0	0	0	1	0	0	0	0	0	0	0	0
0	0	0	0	0	2448	0	0.956164	0	0	0	0	0	0	0	0.956164	0	0	0	0	0	0	0	0
0	0	0	0	0	1051	0	2.98904	0	0	0	0	0	0	0	1	0	0	0	0	0	0	0	0
0	0	0	0	0	4466	0	1.93151	0	0	0	0	0	0	0	1	0	0	0	0	0	0	0	0
0	0	0	0	0	3395	0	1.96438	0	0	0	0	0	0	0	1	0	0	0	0	0	0	0	0
0	0	0	0	0	6367	0	2.99726	0	0	0	0	0	0	0	1	0	0	0	0	0	0	0	0
0	0	0	0	0	5307	0	3.96164	0	0	0	0	0	0	0	1	0	0	0	0	0	0	0	0
0	0	0	0	0	6233	0	1.89041	0	0	0	0	0	0	0	1	0	0	0	0	0	0	0	0
0	0	0	0	0	2821	0	1.98904	0	0	0	0	0	0	0	1	0	0	0	0	0	0	0	0
0	0	0	0	0	6515	0	4.87945	0	0	0	0	0	0	0	1	0	0	0	0	0	0	0	0
0	0	0	0	0	4847	0	1.86849	0	0	0	0	0	0	0	1	0	0	0	0	0	0	0	0
0	0	0	0	0	1342	0	5.7726	0	0	0	0	0	0	0	1	0	0	0	0	0	0	0	0
0	0	0	0	0	6473	0	2.83288	0	0	0	0	0	0	0	1	0	0	0	0	0	0	0	0
0	0	0	0	0	1104	0	3	0	0	0	0	0	0	0	1	0	0	0	0	0	0	0	0
0	0	0	0	0	3213	0	5.96164	0	0	0	0	10	1	0	1	0	0	0	0	0	0	0	0
0	0	0	0	0	1282	0	2.91233	0	0	0	0	0	0	0	1	0	0	0	0	0	0	0	0
0	0	0	0	0	2808	0	4.72055	0	0	0	0	0	0	0	1	0	0	0	0	0	0	0	0
0	0	0	0	0	5294	0	0.950685	0	0	0	0	0	0	0	0.950685	0	0	0	0	0	0	0	0
0	0	0	0	0	6473	0	2.9863	0	0	0	0	0	0	0	1	0	0	0	0	0	0	0	0
0	0	0	0	0	5520	0	4.96438	0	0	0	0	0	0	0	1	0	0	0	0	0	0	0	0
0	0	0	0	0	786	0	2.43014	0	0	0	0	0	0	0	1	0	0	0	0	0	0	0	0
0	0	0	0	0	3713	0	2.98904	0	0	0	0	40	1	0	1	0	0	0	0	0	0	0	0
0	0	0	0	0	2506	0	3.6	0	0	0	0	30	1	0	1	0	0	0	0	0	0	0	0
0	0	0	0	0	6005	0	2.90137	0	0	0	0	15	1	0	1	0	0	0	0	0	0	0	0
0	0	0	0	0	1171	0	0.857534	0	0	0	0	0	0	0	0.857534	0	0	0	0	0	0	0	0
0	0	0	0	0	4348	0	2.98082	0	0	0	0	13.3333	1	0	1	0	0	0	0	0	0	0	0
0	0	0	0	0	4914	0	3.99726	0	0	0	0	7.5	1	0	1	0	0	0	0	0	0	0	0
0	0	0	0	0	2740	0	0.753425	0	0	0	0	0	0	0	0.753425	0	0	0	0	0	0	0	0
0	0	0	0	0	2302	0	2.9863	0	0	0	0	0	0	0	1	0	0	0	0	0	0	0	0
0	0	0	0	0	550	0	2.9589	0	0	0	0	0	0	0	1	0	0	0	0	0	0	0	0
0	0	0	0	0	4844	0	0.863014	0	0	0	0	0	0	0	0.863014	0	0	0	0	0	0	0	0
0	0	0	0	0	2269	0	3.88767	0	0	0	0	0	0	0	1	0	0	0	0	0	0	0	0
0	0	0	0	0	882	0	0.843836	0	0	0	0	0	0	0	0.843836	0	0	0	0	0	0	0	0
0	0	0	0	0	157	0	0.624658	0	0	0	0	0	0	0	0.624658	0	0	0	0	0	0	0	0
0	0	0	0	0	2086	0	5.85753	0	0	0	0	0	0	0	1	0	0	0	0	0	0	0	0
0	0	0	0	0	3771	0	1.94795	0	0	0	0	11.25	1	0	1	0	0	0	0	0	0	0	0
0	0	0	0	0	4522	0	0.838356	0	0	0	0	0	0	0	0.838356	0	0	0	0	0	0	0	0
0	0	0	0	0	3361	0	4.38356	0	0	0	0	0	0	0	1	0	0	0	0	0	0	0	0
0	0	0	0	0	6233	0	1.88493	0	0	0	0	2.33333	1	0	1	0	0	0	0	0	0	0	0
0	0	0	0	0	5397	0	5.69041	0	0	0	0	15	1	0	1	0	0	0	0	0	0	0	0
0	0	0	0	0	2972	0	3.94247	0	0	0	0	30	1	0	1	0	0	0	0	0	0	0	0
0	0	0	0	0	911	0	4.39726	0	0	0	0	15	1	0	1	0	0	0	0	0	0	0	0
0	0	0	0	0	1920	0	1.96986	0	0	0	0	0	0	0	1	0	0	0	0	0	0	0	0
0	0	0	0	0	1891	0	3.99178	0	0	0	0	0	0	0	1	0	0	0	0	0	0	0	0
0	0	0	0	0	1829	0	2.98904	0	0	0	0	0	0	0	1	0	0	0	0	0	0	0	0
0	0	0	0	0	4581	0	4.80274	0	0	0	0	0	0	0	1	0	0	0	0	0	0	0	0
0	0	0	0	0	1037	0	1.98356	0	0	0	0	0	0	0	1	0	0	0	0	0	0	0	0
0	0	0	0	0	4311	0	1.8411	0	0	0	0	0	0	0	1	0	0	0	0	0	0	0	0
0	0	0	0	0	523	0	0.819178	0	0	0	0	0	0	0	0.819178	0	0	0	0	0	0	0	0
0	0	0	0	0	5949	0	0.978082	0	0	0	0	0	0	0	0.978082	0	0	0	0	0	0	0	0
0	0	0	0	0	2559	0	4.7726	0	0	0	0	0	0	0	1	0	0	0	0	0	0	0	0
0	0	0	0	0	1902	0	3.48493	0	0	0	0	0	0	0	1	0	0	0	0	0	0	0	0
0	0	0	0	0	5187	0	3.97534	0	0	0	0	15	1	0	1	0	0	0	0	0	0	0	0
0	0	0	0	0	245	0	5.80274	0	0	0	0	0	0	0	1	0	0	0	0	0	0	0	0
0	0	0	0	0	2706	0	1.81918	0	0	0	0	0	0	0	1	0	0	0	0	0	0	0	0
0	0	0	0	0	1398	0	4.92329	0	0	0	0	7.5	1	0	1	0	0	0	0	0	0	0	0
0	0	0	0	0	5964	0	1.93425	0	0	0	0	0	0	0	1	0	0	0	0	0	0	0	0
0	0	0	0	0	2015	0	4.32055	0	0	0	0	0	0	0	1	0	0	0	0	0	0	0	0
0	0	0	0	0	639	0	2.3863	0	0	0	0	0	0	0	1	0	0	0	0	0	0	0	0
0	0	0	0	0	1405	0	1.6411	0	0	0	0	0	0	0	1	0	0	0	0	0	0	0	0
0	0	0	0	0	2369	0	2.97808	0	0	0	0	0	0	0	1	0	0	0	0	0	0	0	0
0	0	0	0	0	1164	0	4.12329	0	0	0	0	0	0	0	1	0	0	0	0	0	0	0	0
0	0	0	0	0	5834	0	4.8	0	0	0	0	18.125	1	0	1	0	0	0	0	0	0	0	0
0	0	0	0	0	5064	0	1.99452	0	0	0	0	0	0	0	1	0	0	0	0	0	0	0	0
0	0	0	0	0	647	0	3.49589	0	0	0	0	15	1	0	1	0	0	0	0	0	0	0	0
0	0	0	0	0	286	0	4.98082	0	0	0	0	0	0	0	1	0	0	0	0	0	0	0	0
0	0	0	0	0	2904	0	2.93973	0	0	0	0	0	0	0	1	0	0	0	0	0	0	0	0
0	0	0	0	0	2293	0	3.29041	0	0	0	0	0	0	0	1	0	0	0	0	0	0	0	0
0	0	0	0	0	1011	0	1.96164	0	0	0	0	0	0	0	1	0	0	0	0	0	0	0	0
0	0	0	0	0	2423	0	0.657534	0	0	0	0	0	0	0	0.657534	0	0	0	0	0	0	0	0
0	0	0	0	0	4780	0	2.75616	0	0	0	0	0	0	0	1	0	0	0	0	0	0	0	0
0	0	0	0	0	1459	0	0.906849	0	0	0	0	0	0	0	0.906849	0	0	0	0	0	0	0	0
0	0	0	0	0	689	0	0.986301	0	0	0	0	0	0	0	0.986301	0	0	0	0	0	0	0	0
0	0	0	0	0	2178	0	5.92329	0	0	0	0	0	0	0	1	0	0	0	0	0	0	0	0
0	0	0	0	0	5110	0	0.816438	0	0	0	0	0	0	0	0.816438	0	0	0	0	0	0	0	0
0	0	0	0	0	5769	0	1.89589	0	0	0	0	0	0	0	1	0	0	0	0	0	0	0	0
0	0	0	0	0	3658	0	4.90411	0	0	0	0	0	0	0	1	0	0	0	0	0	0	0	0
0	0	0	0	0	546	0	4.96164	0	0	0	0	0	0	0	1	0	0	0	0	0	0	0	0
0	0	0	0	0	2015	0	4.96438	0	0	0	0	3.75	1	0	1	0	0	0	0	0	0	0	0
0	0	0	0	0	2601	0	3.90685	0	0	0	0	0	0	0	1	0	0	0	0	0	0	0	0
0	0	0	0	0	1487	0	3.95068	0	0	0	0	0	0	0	1	0	0	0	0	0	0	0	0
0	0	0	0	0	6193	0	3.96164	0	0	0	0	0	0	0	1	0	0	0	0	0	0	0	0
0	0	0	0	0	4280	0	6	0	0	0	0	35	1	0	1	0	0	0	0	0	0	0	0
0	0	0	0	0	2156	0	2.98904	0	0	0	0	20	1	0	1	0	0	0	0	0	0	0	0
0	0	0	0	0	3367	0	3.90411	0	0	0	0	0	0	0	1	0	0	0	0	0	0	0	0
0	0	0	0	0	1203	0	3.77808	0	0	0	0	0	0	0	1	0	0	0	0	0	0	0	0
0	0	0	0	0	979	0	1.96986	0	0	0	0	0	0	0	1	0	0	0	0	0	0	0	0
0	0	0	0	0	4638	0	5.93699	0	0	0	0	0	0	0	1	0	0	0	0	0	0	0	0
0	0	0	0	0	1780	0	3.99726	0	0	0	0	0	0	0	1	0	0	0	0	0	0	0	0
0	0	0	0	0	1483	0	5.78356	0	0	0	0	0	0	0	1	0	0	0	0	0	0	0	0
0	0	0	0	0	3766	0	0.969863	0	0	0	0	0	0	0	0.969863	0	0	0	0	0	0	0	0
0	0	0	0	0	193	0	2.99726	0	0	0	0	10	1	0	1	0	0	0	0	0	0	0	0
0	0	0	0	0	1226	0	1.83836	0	0	0	0	7.5	1	0	1	0	0	0	0	0	0	0	0
0	0	0	0	0	4512	0	0.673973	0	0	0	0	0	0	0	0.673973	0	0	0	0	0	0	0	0
0	0	0	0	0	780	0	3.94795	0	0	0	0	0	0	0	1	0	0	0	0	0	0	0	0
0	0	0	0	0	1672	0	0.821918	0	0	0	0	0	0	0	0.821918	0	0	0	0	0	0	0	0
0	0	0	0	0	995	0	0.893151	0	0	0	0	0	0	0	0.893151	0	0	0	0	0	0	0	0
0	0	0	0	0	209	0	0.791781	0	0	0	0	0	0	0	0.791781	0	0	0	0	0	0	0	0
0	0	0	0	0	3112	0	0.950685	0	0	0	0	0	0	0	0.950685	0	0	0	0	0	0	0	0
0	0	0	0	0	1792	0	5	0	0	0	0	3.75	1	0	1	0	0	0	0	0	0	0	0
0	0	0	0	0	3497	0	6.00274	0	0	0	0	4.28571	1	0	1	0	0	0	0	0	0	0	0
0	0	0	0	0	3459	0	2.77534	0	0	0	0	0	0	0	1	0	0	0	0	0	0	0	0
0	0	0	0	0	2047	0	5.94521	0	0	0	0	0	0	0	1	0	0	0	0	0	0	0	0
0	0	0	0	0	5768	0	1.71781	0	0	0	0	0	0	0	1	0	0	0	0	0	0	0	0
0	0	0	0	0	2561	0	4.9863	0	0	0	0	12.5	1	0	1	0	0	0	0	0	0	0	0
0	0	0	0	0	979	0	1.93425	0	0	0	0	0	0	0	1	0	0	0	0	0	0	0	0
0	0	0	0	0	200	0	2.32329	0	0	0	0	0	0	0	1	0	0	0	0	0	0	0	0
0	0	0	0	0	6107	0	1.89589	0	0	0	0	5	1	0	1	0	0	0	0	0	0	0	0
0	0	0	0	0	2839	0	0.983562	0	0	0	0	0	0	0	0.983562	0	0	0	0	0	0	0	0
0	0	0	0	0	4283	0	3.08767	0	0	0	0	0	0	0	1	0	0	0	0	0	0	0	0
0	0	0	0	0	5855	0	4.95616	0	0	0	0	0	0	0	1	0	0	0	0	0	0	0	0
0	0	0	0	0	5275	0	3.00274	0	0	0	0	0	0	0	1	0	0	0	0	0	0	0	0
0	0	0	0	0	6323	0	2.29041	0	0	0	0	0	0	0	1	0	0	0	0	0	0	0	0
0	0	0	0	0	1960	0	3.82466	0	0	0	0	0	0	0	1	0	0	0	0	0	0	0	0
0	0	0	0	0	5538	0	4.88767	0	0	0	0	0	0	0	1	0	0	0	0	0	0	0	0
0	0	0	0	0	6012	0	3.61918	0	0	0	0	0	0	0	1	0	0	0	0	0	0	0	0
0	0	0	0	0	3768	0	5.95068	0	0	0	0	3.75	1	0	1	0	0	0	0	0	0	0	0
0	0	0	0	0	4671	0	0.986301	0	0	0	0	0	0	0	0.986301	0	0	0	0	0	0	0	0
0	0	0	0	0	6475	0	0.879452	0	0	0	0	0	0	0	0.879452	0	0	0	0	0	0	0	0
0	0	0	0	0	4404	0	1.94795	0	0	0	0	0	0	0	1	0	0	0	0	0	0	0	0
0	0	0	0	0	4572	0	4.70959	0	0	0	0	0	0	0	1	0	0	0	0	0	0	0	0
0	0	0	0	0	1123	0	5.92055	0	0	0	0	0	0	0	1	0	0	0	0	0	0	0	0
0	0	0	0	0	1901	0	3.89315	0	0	0	0	0	0	0	1	0	0	0	0	0	0	0	0
0	0	0	0	0	2464	0	5.99726	0	0	0	0	0	0	0	1	0	0	0	0	0	0	0	0
0	0	0	0	0	1915	0	1.9726	0	0	0	0	0	0	0	1	0	0	0	0	0	0	0	0
0	0	0	0	0	6264	0	1.96712	0	0	0	0	0	0	0	1	0	0	0	0	0	0	0	0
0	0	0	0	0	1390	0	4.98082	0	0	0	0	0	0	0	1	0	0	0	0	0	0	0	0
0	0	0	0	0	2068	0	5.97534	0	0	0	0	20.2244	1	0	1	0	0	0	0	0	0	0	0
0	0	0	0	0	5585	0	2.70411	0	0	0	0	0	0	0	1	0	0	0	0	0	0	0	0
0	0	0	0	0	5660	0	0.854795	0	0	0	0	0	0	0	0.854795	0	0	0	0	0	0	0	0
0	0	0	0	0	853	0	1.95068	0	0	0	0	0	0	0	1	0	0	0	0	0	0	0	0
0	0	0	0	0	5059	0	3.94795	0	0	0	0	0	0	0	1	0	0	0	0	0	0	0	0
0	0	0	0	0	2579	0	0.547945	0	0	0	0	0	0	0	0.547945	0	0	0	0	0	0	0	0
0	0	0	0	0	3121	0	2.94247	0	0	0	0	0	0	0	1	0	0	0	0	0	0	0	0
0	0	0	0	0	1153	0	5	0	0	0	0	0	0	0	1	0	0	0	0	0	0	0	0
0	0	0	0	0	4999	0	4.86575	0	0	0	0	10	1	0	1	0	0	0	0	0	0	0	0
0	0	0	0	0	1792	0	4.71233	0	0	0	0	0	0	0	1	0	0	0	0	0	0	0	0
0	0	0	0	0	1702	0	2.60274	0	0	0	0	0	0	0	1	0	0	0	0	0	0	0	0
0	0	0	0	0	2423	0	0.975342	0	0	0	0	0	0	0	0.975342	0	0	0	0	0	0	0	0
0	0	0	0	0	4787	0	0.967123	0	0	0	0	0	0	0	0.967123	0	0	0	0	0	0	0	0
0	0	0	0	0	635	0	3.99452	0	0	0	0	22.5	1	0	1	0	0	0	0	0	0	0	0
0	0	0	0	0	432	0	5.99726	0	0	0	0	0	0	0	1	0	0	0	0	0	0	0	0
0	0	0	0	0	3422	0	2.83014	0	0	0	0	0	0	0	1	0	0	0	0	0	0	0	0
0	0	0	0	0	4557	0	0.994521	0	0	0	0	0	0	0	0.994521	0	0	0	0	0	0	0	0
0	0	0	0	0	5732	0	3.9863	0	0	0	0	0	0	0	1	0	0	0	0	0	0	0	0
0	0	0	0	0	1746	0	1.89315	0	0	0	0	0	0	0	1	0	0	0	0	0	0	0	0
0	0	0	0	0	3072	0	4.74247	0	0	0	0	15	1	0	1	0	0	0	0	0	0	0	0
0	0	0	0	0	4148	0	5.06849	0	0	0	0	0.803571	1	0	1	0	0	0	0	0	0	0	0
0	0	0	0	0	1592	0	1.98904	0	0	0	0	0	0	0	1	0	0	0	0	0	0	0	0
0	0	0	0	0	3400	0	3.69315	0	0	0	0	15	1	0	1	0	0	0	0	0	0	0	0
0	0	0	0	0	5054	0	3.84658	0	0	0	0	0	0	0	1	0	0	0	0	0	0	0	0
0	0	0	0	0	4126	0	3.97534	0	0	0	0	0	0	0	1	0	0	0	0	0	0	0	0
0	0	0	0	0	5806	0	2.54795	0	0	0	0	0	0	0	1	0	0	0	0	0	0	0	0
0	0	0	0	0	1137	0	0.917808	0	0	0	0	0	0	0	0.917808	0	0	0	0	0	0	0	0
0	0	0	0	0	4997	0	0.69863	0	0	0	0	0	0	0	0.69863	0	0	0	0	0	0	0	0
0	0	0	0	0	3425	0	4.86575	0	0	0	0	7.5	1	0	1	0	0	0	0	0	0	0	0
0	0	0	0	0	1327	0	1.92603	0	0	0	0	0	0	0	1	0	0	0	0	0	0	0	0
0	0	0	0	0	3152	0	4.63836	0	0	0	0	0	0	0	1	0	0	0	0	0	0	0	0
0	0	0	0	0	5596	0	5.98356	0	0	0	0	0	0	0	1	0	0	0	0	0	0	0	0
0	0	0	0	0	160	0	1.99452	0	0	0	0	0	0	0	1	0	0	0	0	0	0	0	0
0	0	0	0	0	4584	0	2.99178	0	0	0	0	0	0	0	1	0	0	0	0	0	0	0	0
0	0	0	0	0	306	0	4.85753	0	0	0	0	3.75	1	0	1	0	0	0	0	0	0	0	0
0	0	0	0	0	4249	0	4.18082	0	0	0	0	0	0	0	1	0	0	0	0	0	0	0	0
0	0	0	0	0	596	0	1.85479	0	0	0	0	0	0	0	1	0	0	0	0	0	0	0	0
0	0	0	0	0	4434	0	2.98904	0	0	0	0	0	0	0	1	0	0	0	0	0	0	0	0
0	0	0	0	0	4205	0	2.20822	0	0	0	0	0	0	0	1	0	0	0	0	0	0	0	0
0	0	0	0	0	2149	0	2.98082	0	0	0	0	0	0	0	1	0	0	0	0	0	0	0	0
0	0	0	0	0	2680	0	3.90411	0	0	0	0	0	0	0	1	0	0	0	0	0	0	0	0
0	0	0	0	0	4380	0	1.89589	0	0	0	0	0	0	0	1	0	0	0	0	0	0	0	0
0	0	0	0	0	5904	0	1.66027	0	0	0	0	0	0	0	1	0	0	0	0	0	0	0	0
0	0	0	0	0	689	0	0.767123	0	0	0	0	0	0	0	0.767123	0	0	0	0	0	0	0	0
0	0	0	0	0	874	0	2.83288	0	0	0	0	0	0	0	1	0	0	0	0	0	0	0	0
0	0	0	0	0	3030	0	4.93973	0	0	0	0	15	1	0	1	0	0	0	0	0	0	0	0
0	0	0	0	0	5612	0	5.92055	0	0	0	0	0	0	0	1	0	0	0	0	0	0	0	0
0	0	0	0	0	5288	0	6	0	0	0	0	0	0	0	1	0	0	0	0	0	0	0	0
0	0	0	0	0	6322	0	5	0	0	0	0	0	0	0	1	0	0	0	0	0	0	0	0
0	0	0	0	0	2938	0	3.8411	0	0	0	0	65	1	0	1	0	0	0	0	0	0	0	0
0	0	0	0	0	1830	0	4.76164	0	0	0	0	0	0	0	1	0	0	0	0	0	0	0	0
0	0	0	0	0	2257	0	4.99452	0	0	0	0	10	1	0	1	0	0	0	0	0	0	0	0
0	0	0	0	0	2883	0	3.44658	0	0	0	0	0	0	0	1	0	0	0	0	0	0	0	0
0	0	0	0	0	4420	0	5.98356	0	0	0	0	13.125	1	0	1	0	0	0	0	0	0	0	0
0	0	0	0	0	312	0	5.1726	0	0	0	0	15	1	0	1	0	0	0	0	0	0	0	0
0	0	0	0	0	651	0	5	0	0	0	0	6.96429	1	0	1	0	0	0	0	0	0	0	0
0	0	0	0	0	2604	0	2.96164	0	0	0	0	0	0	0	1	0	0	0	0	0	0	0	0
0	0	0	0	0	3182	0	4.86027	0	0	0	0	10	1	0	1	0	0	0	0	0	0	0	0
0	0	0	0	0	6264	0	1.77534	0	0	0	0	0	0	0	1	0	0	0	0	0	0	0	0
0	0	0	0	0	4303	0	1.91507	0	0	0	0	0	0	0	1	0	0	0	0	0	0	0	0
0	0	0	0	0	1439	0	3.96986	0	0	0	0	0	0	0	1	0	0	0	0	0	0	0	0
0	0	0	0	0	920	0	3.83014	0	0	0	0	26.6667	1	0	1	0	0	0	0	0	0	0	0
0	0	0	0	0	108	0	1.99452	0	0	0	0	0	0	0	1	0	0	0	0	0	0	0	0
0	0	0	0	0	5477	0	1.91507	0	0	0	0	0	0	0	1	0	0	0	0	0	0	0	0
0	0	0	0	0	1848	0	3.93973	0	0	0	0	13.3333	1	0	1	0	0	0	0	0	0	0	0
0	0	0	0	0	6552	0	4.38082	0	0	0	0	0	0	0	1	0	0	0	0	0	0	0	0
0	0	0	0	0	5798	0	0.80274	0	0	0	0	0	0	0	0.80274	0	0	0	0	0	0	0	0
0	0	0	0	0	1651	0	5.83836	1	0	0	1	0	0	0	1	0	0	0	0	0	0	0	0
0	0	0	0	0	6233	0	1.73151	0	0	0	0	0	0	0	1	0	0	0	0	0	0	0	0
0	0	0	0	0	2828	0	3.67397	0	0	0	0	0	0	0	1	0	0	0	0	0	0	0	0
0	0	0	0	0	5853	0	3.7726	0	0	0	0	0	0	0	1	0	0	0	0	0	0	0	0
0	0	0	0	0	3587	0	3.93699	0	0	0	0	0	0	0	1	0	0	0	0	0	0	0	0
0	0	0	0	0	3215	0	3.98356	0	0	0	0	0	0	0	1	0	0	0	0	0	0	0	0
0	0	0	0	0	229	0	4.93151	0	0	0	0	0	0	0	1	0	0	0	0	0	0	0	0
0	0	0	0	0	3983	0	4.91507	0	0	0	0	0	0	0	1	0	0	0	0	0	0	0	0
0	0	0	0	0	3757	0	0.958904	0	0	0	0	0	0	0	0.958904	0	0	0	0	0	0	0	0
0	0	0	0	0	3713	0	2.86849	0	0	0	0	0	0	0	1	0	0	0	0	0	0	0	0
0	0	0	0	0	279	0	2.99178	0	0	0	0	0	0	0	1	0	0	0	0	0	0	0	0
0	0	0	0	0	5280	0	2.90137	0	0	0	0	0	0	0	1	0	0	0	0	0	0	0	0
0	0	0	0	0	2873	0	3	0	0	0	0	15	1	0	1	0	0	0	0	0	0	0	0
0	0	0	0	0	441	0	1.64658	0	0	0	0	0	0	0	1	0	0	0	0	0	0	0	0
0	0	0	0	0	5817	0	3.97808	0	0	0	0	0	0	0	1	0	0	0	0	0	0	0	0
0	0	0	0	0	3872	0	5.93151	0	0	0	0	0	0	0	1	0	0	0	0	0	0	0	0
0	0	0	0	0	3734	0	2.81918	0	0	0	0	7.5	1	0	1	0	0	0	0	0	0	0	0
0	0	0	0	0	128	0	5.93973	1	0	0	1	88.3333	1	0	1	0	0	0	0	0	0	0	0
0	0	0	0	0	1056	0	4.99726	0	0	0	0	0	0	0	1	0	0	0	0	0	0	0	0
0	0	0	0	0	3720	0	2.93973	0	0	0	0	0	0	0	1	0	0	0	0	0	0	0	0
0	0	0	0	0	5098	0	3.88493	0	0	0	0	0	0	0	1	0	0	0	0	0	0	0	0
0	0	0	0	0	4848	0	0.953425	0	0	0	0	0	0	0	0.953425	0	0	0	0	0	0	0	0
0	0	0	0	0	2334	0	0.915068	0	0	0	0	0	0	0	0.915068	0	0	0	0	0	0	0	0
0	0	0	0	0	1405	0	1.94247	0	0	0	0	0	0	0	1	0	0	0	0	0	0	0	0
0	0	0	0	0	2593	0	5.81096	0	0	0	0	0	0	0	1	0	0	0	0	0	0	0	0
0	0	0	0	0	4645	0	4.16712	0	0	0	0	0	0	0	1	0	0	0	0	0	0	0	0
0	0	0	0	0	4014	0	3.94795	0	0	0	0	0	0	0	1	0	0	0	0	0	0	0	0
0	0	0	0	0	4621	0	1.93699	0	0	0	0	0	0	0	1	0	0	0	0	0	0	0	0
0	0	0	0	0	525	0	5.92055	0	0	0	0	53.3263	1	0	1	0	0	0	0	0	0	0	0
0	0	0	0	0	2261	0	2.7863	0	0	0	0	0	0	0	1	0	0	0	0	0	0	0	0
0	0	0	0	0	6218	0	3.98082	0	0	0	0	7.5	1	0	1	0	0	0	0	0	0	0	0
0	0	0	0	0	5664	0	1.81096	0	0	0	0	0	0	0	1	0	0	0	0	0	0	0	0
0	0	0	0	0	2947	0	0.821918	0	0	0	0	0	0	0	0.821918	0	0	0	0	0	0	0	0
0	0	0	0	0	5277	0	0.983562	0	0	0	0	0	0	0	0.983562	0	0	0	0	0	0	0	0
0	0	0	0	0	339	0	2.93973	0	0	0	0	0	0	0	1	0	0	0	0	0	0	0	0
0	0	0	0	0	3092	0	4.80548	0	0	0	0	15	1	0	1	0	0	0	0	0	0	0	0
0	0	0	0	0	1944	0	1.99452	0	0	0	0	0	0	0	1	0	0	0	0	0	0	0	0
0	0	0	0	0	1651	0	5.96164	0	0	0	0	0	0	0	1	0	0	0	0	0	0	0	0
0	0	0	0	0	4908	0	0.972603	0	0	0	0	0	0	0	0.972603	0	0	0	0	0	0	0	0
0	0	0	0	0	3940	0	2.92603	0	0	0	0	20	1	0	1	0	0	0	0	0	0	0	0
0	0	0	0	0	3879	0	0.945205	0	0	0	0	0	0	0	0.945205	0	0	0	0	0	0	0	0
0	0	0	0	0	5438	0	4.9726	0	0	0	0	0	0	0	1	0	0	0	0	0	0	0	0
0	0	0	0	0	2535	0	6	0	0	0	0	10	1	0	1	0	0	0	0	0	0	0	0
0	0	0	0	0	5827	0	3.82192	0	0	0	0	0	0	0	1	0	0	0	0	0	0	0	0
0	0	0	0	0	2915	0	4.90959	0	0	0	0	0	0	0	1	0	0	0	0	0	0	0	0
0	0	0	0	0	245	0	5.90411	0	0	0	0	10	1	0	1	0	0	0	0	0	0	0	0
0	0	0	0	0	1483	0	5.71507	0	0	0	0	0	0	0	1	0	0	0	0	0	0	0	0
0	0	0	0	0	2969	0	4.84932	0	0	0	0	0	0	0	1	0	0	0	0	0	0	0	0
0	0	0	0	0	5741	0	5.63288	0	0	0	0	0	0	0	1	0	0	0	0	0	0	0	0
0	0	0	0	0	2473	0	2.60548	0	0	0	0	0	0	0	1	0	0	0	0	0	0	0	0
0	0	0	0	0	3872	0	5.99452	0	0	0	0	0	0	0	1	0	0	0	0	0	0	0	0
0	0	0	0	0	2506	0	3.99726	0	0	0	0	0	0	0	1	0	0	0	0	0	0	0	0
0	0	0	0	0	1971	0	4.67397	0	0	0	0	0	0	0	1	0	0	0	0	0	0	0	0
0	0	0	0	0	5405	0	4.92603	0	0	0	0	35	1	0	1	0	0	0	0	0	0	0	0
0	0	0	0	0	1747	0	2.94795	0	0	0	0	15	1	0	1	0	0	0	0	0	0	0	0
0	0	0	0	0	6042	0	0.994521	0	0	0	0	0	0	0	0.994521	0	0	0	0	0	0	0	0
0	0	0	0	0	1309	0	4.49315	0	0	0	0	7.5	1	0	1	0	0	0	0	0	0	0	0
0	0	0	0	0	5560	0	5.95616	0	0	0	0	0	0	0	1	0	0	0	0	0	0	0	0
0	0	0	0	0	5699	0	0.819178	0	0	0	0	0	0	0	0.819178	0	0	0	0	0	0	0	0
0	0	0	0	0	2594	0	3.9863	0	0	0	0	0	0	0	1	0	0	0	0	0	0	0	0
0	0	0	0	0	4422	0	1.95342	0	0	0	0	0	0	0	1	0	0	0	0	0	0	0	0
0	0	0	0	0	2297	0	0.964384	0	0	0	0	0	0	0	0.964384	0	0	0	0	0	0	0	0
0	0	0	0	0	3381	0	4.89041	0	0	0	0	0	0	0	1	0	0	0	0	0	0	0	0
0	0	0	0	0	4721	0	3.94795	0	0	0	0	7.5	1	0	1	0	0	0	0	0	0	0	0
0	0	0	0	0	1594	0	5.72055	0	0	0	0	0	0	0	1	0	0	0	0	0	0	0	0
0	0	0	0	0	3692	0	0.745205	0	0	0	0	0	0	0	0.745205	0	0	0	0	0	0	0	0
0	0	0	0	0	1334	0	5.96164	0	0	0	0	22.5	1	0	1	0	0	0	0	0	0	0	0
0	0	0	0	0	5119	0	2.92603	0	0	0	0	15	1	0	1	0	0	0	0	0	0	0	0
0	0	0	0	0	5094	0	3.98356	0	0	0	0	0	0	0	1	0	0	0	0	0	0	0	0
0	0	0	0	0	4383	0	1.75616	0	0	0	0	0	0	0	1	0	0	0	0	0	0	0	0
0	0	0	0	0	325	0	2.9726	0	0	0	0	0	0	0	1	0	0	0	0	0	0	0	0
0	0	0	0	0	825	0	2.96164	0	0	0	0	0	0	0	1	0	0	0	0	0	0	0	0
0	0	0	0	0	3531	0	0.923288	0	0	0	0	0	0	0	0.923288	0	0	0	0	0	0	0	0
0	0	0	0	0	555	0	0.254795	0	0	0	0	0	0	0	0.254795	0	0	0	0	0	0	0	0
0	0	0	0	0	2186	0	0.882192	0	0	0	0	0	0	0	0.882192	0	0	0	0	0	0	0	0
0	0	0	0	0	2828	0	3.16986	0	0	0	0	0	0	0	1	0	0	0	0	0	0	0	0
0	0	0	0	0	5084	0	3.60548	0	0	0	0	0	0	0	1	0	0	0	0	0	0	0	0
0	0	0	0	0	4781	0	4.65479	0	0	0	0	10	1	0	1	0	0	0	0	0	0	0	0
0	0	0	0	0	657	0	3.66301	0	0	0	0	0	0	0	1	0	0	0	0	0	0	0	0
0	0	0	0	0	3263	0	0.978082	0	0	0	0	0	0	0	0.978082	0	0	0	0	0	0	0	0
0	0	0	0	0	1787	0	3.63836	0	0	0	0	0	0	0	1	0	0	0	0	0	0	0	0
0	0	0	0	0	3338	0	1.92329	0	0	0	0	0	0	0	1	0	0	0	0	0	0	0	0
0	0	0	0	0	2768	0	4.92329	0	0	0	0	0	0	0	1	0	0	0	0	0	0	0	0
0	0	0	0	0	3391	0	2.31781	0	0	0	0	0	0	0	1	0	0	0	0	0	0	0	0
0	0	0	0	0	4245	0	3.81644	0	0	0	0	0	0	0	1	0	0	0	0	0	0	0	0
0	0	0	0	0	4854	0	5.99726	0	0	0	0	0	0	0	1	0	0	0	0	0	0	0	0
0	0	0	0	0	2563	0	3.94795	0	0	0	0	10	1	0	1	0	0	0	0	0	0	0	0
0	0	0	0	0	4175	0	5	0	0	0	0	6.25	1	0	1	0	0	0	0	0	0	0	0
0	0	0	0	0	183	0	0.819178	0	0	0	0	0	0	0	0.819178	0	0	0	0	0	0	0	0
0	0	0	0	0	2933	0	2.96438	0	0	0	0	2.85714	1	0	1	0	0	0	0	0	0	0	0
0	0	0	0	0	5487	0	5.9726	0	0	0	0	17.5893	1	0	1	0	0	0	0	0	0	0	0
0	0	0	0	0	3304	0	4.8	0	0	0	0	0.6	1	0	1	0	0	0	0	0	0	0	0
0	0	0	0	0	1170	0	2.92877	0	0	0	0	0	0	0	1	0	0	0	0	0	0	0	0
0	0	0	0	0	5381	0	4.82466	0	0	0	0	0	0	0	1	0	0	0	0	0	0	0	0
0	0	0	0	0	3100	0	2.84384	0	0	0	0	0	0	0	1	0	0	0	0	0	0	0	0
0	0	0	0	0	440	0	1.96712	0	0	0	0	0	0	0	1	0	0	0	0	0	0	0	0
0	0	0	0	0	1080	0	2.98356	0	0	0	0	6.25	1	0	1	0	0	0	0	0	0	0	0
0	0	0	0	0	2120	0	5.73425	0	0	0	0	0	0	0	1	0	0	0	0	0	0	0	0
0	0	0	0	0	689	0	0.961644	0	0	0	0	0	0	0	0.961644	0	0	0	0	0	0	0	0
0	0	0	0	0	2587	0	1.98082	0	0	0	0	0	0	0	1	0	0	0	0	0	0	0	0
0	0	0	0	0	779	0	1.96986	0	0	0	0	0	0	0	1	0	0	0	0	0	0	0	0
0	0	0	0	0	6413	0	3.98356	0	0	0	0	0	0	0	1	0	0	0	0	0	0	0	0
0	0	0	0	0	880	0	2.77808	0	0	0	0	0	0	0	1	0	0	0	0	0	0	0	0
0	0	0	0	0	3378	0	4.03836	0	0	0	0	66.6667	1	0	1	0	0	0	0	0	0	0	0
0	0	0	0	0	531	0	1.89863	0	0	0	0	0	0	0	1	0	0	0	0	0	0	0	0
0	0	0	0	0	2816	0	4.8274	0	0	0	0	0	0	0	1	0	0	0	0	0	0	0	0
0	0	0	0	0	973	0	3.94795	0	0	0	0	0	0	0	1	0	0	0	0	0	0	0	0
0	0	0	0	0	1400	0	5.96164	0	0	0	0	8.33333	1	0	1	0	0	0	0	0	0	0	0
0	0	0	0	0	3621	0	1.89041	0	0	0	0	0	0	0	1	0	0	0	0	0	0	0	0
0	0	0	0	0	141	0	0.989041	0	0	0	0	0	0	0	0.989041	0	0	0	0	0	0	0	0
0	0	0	0	0	4791	0	1.99452	0	0	0	0	0	0	0	1	0	0	0	0	0	0	0	0
0	0	0	0	0	779	0	1.93699	0	0	0	0	0	0	0	1	0	0	0	0	0	0	0	0
0	0	0	0	0	618	0	4.9863	0	0	0	0	0	0	0	1	0	0	0	0	0	0	0	0
0	0	0	0	0	3432	0	2.02192	0	0	0	0	0	0	0	1	0	0	0	0	0	0	0	0
0	0	0	0	0	2996	0	2.93425	0	0	0	0	0	0	0	1	0	0	0	0	0	0	0	0
0	0	0	0	0	4699	0	0.235616	0	0	0	0	0	0	0	0.235616	0	0	0	0	0	0	0	0
0	0	0	0	0	5801	0	5.92329	0	0	0	0	0	0	0	1	0	0	0	0	0	0	0	0
0	0	0	0	0	4713	0	5.93151	0	0	0	0	0	0	0	1	0	0	0	0	0	0	0	0
0	0	0	0	0	3827	0	4.8	0	0	0	0	0	0	0	1	0	0	0	0	0	0	0	0
0	0	0	0	0	287	0	2.97808	0	0	0	0	0	0	0	1	0	0	0	0	0	0	0	0
0	0	0	0	0	4781	0	4.9726	0	0	0	0	0	0	0	1	0	0	0	0	0	0	0	0
0	0	0	0	0	3192	0	3.76986	0	0	0	0	26.2778	1	0	1	0	0	0	0	0	0	0	0
0	0	0	0	0	4624	0	1.94521	0	0	0	0	0	0	0	1	0	0	0	0	0	0	0	0
0	0	0	0	0	851	0	1.9863	0	0	0	0	0	0	0	1	0	0	0	0	0	0	0	0
0	0	0	0	0	5262	0	2.84932	0	0	0	0	35.7143	1	0	1	0	0	0	0	0	0	0	0
0	0	0	0	0	2297	0	0.89863	0	0	0	0	0	0	0	0.89863	0	0	0	0	0	0	0	0
0	0	0	0	0	224	0	0.975342	0	0	0	0	0	0	0	0.975342	0	0	0	0	0	0	0	0
0	0	0	0	0	4262	0	2.98356	0	0	0	0	0	0	0	1	0	0	0	0	0	0	0	0
0	0	0	0	0	4170	0	2.98082	0	0	0	0	0	0	0	1	0	0	0	0	0	0	0	0
0	0	0	0	0	5528	0	2.6	0	0	0	0	0	0	0	1	0	0	0	0	0	0	0	0
0	0	0	0	0	3785	0	3.90959	0	0	0	0	5	1	0	1	0	0	0	0	0	0	0	0
0	0	0	0	0	5221	0	0.69589	0	0	0	0	0	0	0	0.69589	0	0	0	0	0	0	0	0
0	0	0	0	0	1952	0	2.9589	0	0	0	0	10	1	0	1	0	0	0	0	0	0	0	0
0	0	0	0	0	1926	0	5	0	0	0	0	0	0	0	1	0	0	0	0	0	0	0	0
0	0	0	0	0	2730	0	0.284932	0	0	0	0	0	0	0	0.284932	0	0	0	0	0	0	0	0
0	0	0	0	0	1152	0	2.73699	0	0	0	0	0	0	0	1	0	0	0	0	0	0	0	0
0	0	0	0	0	4852	0	2.57808	0	0	0	0	0	0	0	1	0	0	0	0	0	0	0	0
0	0	0	0	0	893	0	1.9863	0	0	0	0	0	0	0	1	0	0	0	0	0	0	0	0
0	0	0	0	0	3757	0	0.926027	0	0	0	0	0	0	0	0.926027	0	0	0	0	0	0	0	0
0	0	0	0	0	1898	0	1.86849	0	0	0	0	0	0	0	1	0	0	0	0	0	0	0	0
0	0	0	0	0	2999	0	0.709589	0	0	0	0	0	0	0	0.709589	0	0	0	0	0	0	0	0
0	0	0	0	0	4594	0	0.947945	0	0	0	0	0	0	0	0.947945	0	0	0	0	0	0	0	0
0	0	0	0	0	5092	0	1.99452	0	0	0	0	20	1	0	1	0	0	0	0	0	0	0	0
0	0	0	0	0	2427	0	1.91507	0	0	0	0	0	0	0	1	0	0	0	0	0	0	0	0
0	0	0	0	0	1767	0	0.372603	0	0	0	0	0	0	0	0.372603	0	0	0	0	0	0	0	0
0	0	0	0	0	5432	0	5.97534	0	0	0	0	36.2381	1	0	1	0	0	0	0	0	0	0	0
0	0	0	0	0	4341	0	3.93973	0	0	0	0	0	0	0	1	0	0	0	0	0	0	0	0
0	0	0	0	0	846	0	4.53425	0	0	0	0	0	0	0	1	0	0	0	0	0	0	0	0
0	0	0	0	0	2952	0	0.917808	0	0	0	0	0	0	0	0.917808	0	0	0	0	0	0	0	0
0	0	0	0	0	1768	0	3.96164	0	0	0	0	0	0	0	1	0	0	0	0	0	0	0	0
0	0	0	0	0	2664	0	4.82192	0	0	0	0	10	1	0	1	0	0	0	0	0	0	0	0
0	0	0	0	0	645	0	4.86301	0	0	0	0	0	0	0	1	0	0	0	0	0	0	0	0
0	0	0	0	0	5903	0	1.95342	0	0	0	0	0	0	0	1	0	0	0	0	0	0	0	0
0	0	0	0	0	5019	0	1.96438	0	0	0	0	0	0	0	1	0	0	0	0	0	0	0	0
0	0	0	0	0	547	0	0.99726	0	0	0	0	0	0	0	0.99726	0	0	0	0	0	0	0	0
0	0	0	0	0	4699	0	0.994521	0	0	0	0	0	0	0	0.994521	0	0	0	0	0	0	0	0
0	0	0	0	0	5477	0	1.99178	0	0	0	0	0	0	0	1	0	0	0	0	0	0	0	0
0	0	0	0	0	4035	0	0.326027	0	0	0	0	0	0	0	0.326027	0	0	0	0	0	0	0	0
0	0	0	0	0	2189	0	4.36438	0	0	0	0	0	0	0	1	0	0	0	0	0	0	0	0
0	0	0	0	0	3706	0	5.98356	0	0	0	0	0	0	0	1	0	0	0	0	0	0	0	0
0	0	0	0	0	4539	0	0.967123	0	0	0	0	0	0	0	0.967123	0	0	0	0	0	0	0	0
0	0	0	0	0	4999	0	4.90411	0	0	0	0	0	0	0	1	0	0	0	0	0	0	0	0
0	0	0	0	0	1149	0	4.83836	0	0	0	0	20	1	0	1	0	0	0	0	0	0	0	0
0	0	0	0	0	3259	0	3.84384	0	0	0	0	20	1	0	1	0	0	0	0	0	0	0	0
0	0	0	0	0	3733	0	0.991781	0	0	0	0	0	0	0	0.991781	0	0	0	0	0	0	0	0
0	0	0	0	0	1666	0	2.92877	0	0	0	0	0	0	0	1	0	0	0	0	0	0	0	0
0	0	0	0	0	1228	0	2.90137	0	0	0	0	20	1	0	1	0	0	0	0	0	0	0	0
0	0	0	0	0	6473	0	2.9863	0	0	0	0	0	0	0	1	0	0	0	0	0	0	0	0
0	0	0	0	0	1327	0	1.94521	0	0	0	0	0	0	0	1	0	0	0	0	0	0	0	0
0	0	0	0	0	405	0	2.8137	0	0	0	0	0	0	0	1	0	0	0	0	0	0	0	0
0	0	0	0	0	1151	0	2.03014	0	0	0	0	0	0	0	1	0	0	0	0	0	0	0	0
0	0	0	0	0	979	0	1.92603	0	0	0	0	0	0	0	1	0	0	0	0	0	0	0	0
0	0	0	0	0	6384	0	0.468493	0	0	0	0	0	0	0	0.468493	0	0	0	0	0	0	0	0
0	0	0	0	0	1497	0	2.77534	0	0	0	0	0	0	0	1	0	0	0	0	0	0	0	0
0	0	0	0	0	3355	0	4.94795	0	0	0	0	20	1	0	1	0	0	0	0	0	0	0	0
0	0	0	0	0	6382	0	0.947945	0	0	0	0	0	0	0	0.947945	0	0	0	0	0	0	0	0
0	0	0	0	0	6097	0	2.92603	0	0	0	0	25.8333	1	0	1	0	0	0	0	0	0	0	0
0	0	0	0	0	5271	0	2.96164	0	0	0	0	15	1	0	1	0	0	0	0	0	0	0	0
0	0	0	0	0	2109	0	5.67123	0	0	0	0	0	0	0	1	0	0	0	0	0	0	0	0
0	0	0	0	0	3639	0	2.77534	0	0	0	0	22.5	1	0	1	0	0	0	0	0	0	0	0
0	0	0	0	0	5566	0	2.85753	0	0	0	0	0	0	0	1	0	0	0	0	0	0	0	0
0	0	0	0	0	206	0	5.43288	0	0	0	0	0	0	0	1	0	0	0	0	0	0	0	0
0	0	0	0	0	6170	0	4.25205	0	0	0	0	0	0	0	1	0	0	0	0	0	0	0	0
0	0	0	0	0	4907	0	1.89041	0	0	0	0	15	1	0	1	0	0	0	0	0	0	0	0
0	0	0	0	0	167	0	5.98356	0	0	0	0	0	0	0	1	0	0	0	0	0	0	0	0
0	0	0	0	0	5252	0	3.86849	0	0	0	0	15	1	0	1	0	0	0	0	0	0	0	0
0	0	0	0	0	1968	0	0.879452	0	0	0	0	0	0	0	0.879452	0	0	0	0	0	0	0	0
0	0	0	0	0	6477	0	1.95342	0	0	0	0	0	0	0	1	0	0	0	0	0	0	0	0
0	0	0	0	0	4774	0	3.31781	0	0	0	0	0	0	0	1	0	0	0	0	0	0	0	0
0	0	0	0	0	1203	0	3.91233	0	0	0	0	28	1	0	1	0	0	0	0	0	0	0	0
0	0	0	0	0	4611	0	3.98904	0	0	0	0	0	0	0	1	0	0	0	0	0	0	0	0
0	0	0	0	0	6412	0	1.92877	0	0	0	0	7.5	1	0	1	0	0	0	0	0	0	0	0
0	0	0	0	0	236	0	5.9589	0	0	0	0	0	0	0	1	0	0	0	0	0	0	0	0
0	0	0	0	0	6148	0	3.90685	0	0	0	0	3.75	1	0	1	0	0	0	0	0	0	0	0
0	0	0	0	0	4879	0	2.94521	0	0	0	0	0	0	0	1	0	0	0	0	0	0	0	0
0	0	0	0	0	5749	0	2.95342	0	0	0	0	18.75	1	0	1	0	0	0	0	0	0	0	0
0	0	0	0	0	5634	0	1.97808	0	0	0	0	0	0	0	1	0	0	0	0	0	0	0	0
0	0	0	0	0	2811	0	3.89315	0	0	0	0	7.5	1	0	1	0	0	0	0	0	0	0	0
0	0	0	0	0	1406	0	0.986301	0	0	0	0	0	0	0	0.986301	0	0	0	0	0	0	0	0
0	0	0	0	0	4873	0	3.66849	0	0	0	0	0	0	0	1	0	0	0	0	0	0	0	0
0	0	0	0	0	4944	0	3.93425	0	0	0	0	20.625	1	0	1	0	0	0	0	0	0	0	0
0	0	0	0	0	4938	0	1.94521	0	0	0	0	6.25	1	0	1	0	0	0	0	0	0	0	0
0	0	0	0	0	1633	0	0.632877	0	0	0	0	0	0	0	0.632877	0	0	0	0	0	0	0	0
0	0	0	0	0	4110	0	3.82466	0	0	0	0	0	0	0	1	0	0	0	0	0	0	0	0
0	0	0	0	0	6097	0	2.99178	0	0	0	0	0	0	0	1	0	0	0	0	0	0	0	0
0	0	0	0	0	5894	0	3.90685	0	0	0	0	15	1	0	1	0	0	0	0	0	0	0	0
0	0	0	0	0	644	0	0.29589	0	0	0	0	0	0	0	0.29589	0	0	0	0	0	0	0	0
0	0	0	0	0	2915	0	4.93425	0	0	0	0	0	0	0	1	0	0	0	0	0	0	0	0
0	0	0	0	0	6525	0	4.21096	0	0	0	0	3.75	1	0	1	0	0	0	0	0	0	0	0
0	0	0	0	0	4201	0	0.835616	0	0	0	0	0	0	0	0.835616	0	0	0	0	0	0	0	0
0	0	0	0	0	286	0	4.97808	0	0	0	0	0	0	0	1	0	0	0	0	0	0	0	0
0	0	0	0	0	489	0	0.284932	0	0	0	0	0	0	0	0.284932	0	0	0	0	0	0	0	0
0	0	0	0	0	1968	0	0.742466	0	0	0	0	0	0	0	0.742466	0	0	0	0	0	0	0	0
0	0	0	0	0	810	0	2.9863	0	0	0	0	0	0	0	1	0	0	0	0	0	0	0	0
0	0	0	0	0	703	0	3.88219	0	0	0	0	0	0	0	1	0	0	0	0	0	0	0	0
0	0	0	0	0	4493	0	5	0	0	0	0	0	0	0	1	0	0	0	0	0	0	0	0
0	0	0	0	0	2025	0	0.893151	0	0	0	0	0	0	0	0.893151	0	0	0	0	0	0	0	0
0	0	0	0	0	5321	0	5.57534	0	0	0	0	0	0	0	1	0	0	0	0	0	0	0	0
0	0	0	0	0	3890	0	3.97534	0	0	0	0	0	0	0	1	0	0	0	0	0	0	0	0
0	0	0	0	0	6337	0	3.64384	0	0	0	0	0	0	0	1	0	0	0	0	0	0	0	0
0	0	0	0	0	2651	0	2.95068	0	0	0	0	0	0	0	1	0	0	0	0	0	0	0	0
0	0	0	0	0	2089	0	0.967123	0	0	0	0	0	0	0	0.967123	0	0	0	0	0	0	0	0
0	0	0	0	0	5678	0	0.728767	0	0	0	0	0	0	0	0.728767	0	0	0	0	0	0	0	0
0	0	0	0	0	3364	0	0.991781	0	0	0	0	0	0	0	0.991781	0	0	0	0	0	0	0	0
0	0	0	0	0	808	0	3.98904	0	0	0	0	35	1	0	1	0	0	0	0	0	0	0	0
0	0	0	0	0	1503	0	1.75068	0	0	0	0	0	0	0	1	0	0	0	0	0	0	0	0
0	0	0	0	0	3215	0	3.90685	0	0	0	0	0	0	0	1	0	0	0	0	0	0	0	0
0	0	0	0	0	818	0	3.46301	0	0	0	0	3.75	1	0	1	0	0	0	0	0	0	0	0
0	0	0	0	0	2851	0	3.77808	0	0	0	0	0	0	0	1	0	0	0	0	0	0	0	0
0	0	0	0	0	6529	0	2.96986	0	0	0	0	0	0	0	1	0	0	0	0	0	0	0	0
0	0	0	0	0	1276	0	5.8	0	0	0	0	0	0	0	1	0	0	0	0	0	0	0	0
0	0	0	0	0	13	0	3.84932	0	0	0	0	0	0	0	1	0	0	0	0	0	0	0	0
0	0	0	0	0	4089	0	3.98082	0	0	0	0	15	1	0	1	0	0	0	0	0	0	0	0
0	0	0	0	0	5851	0	2.88493	0	0	0	0	0	0	0	1	0	0	0	0	0	0	0	0
0	0	0	0	0	245	0	5.89589	0	0	0	0	0	0	0	1	0	0	0	0	0	0	0	0
0	0	0	0	0	458	0	3.99726	0	0	0	0	0	0	0	1	0	0	0	0	0	0	0	0
0	0	0	0	0	5532	0	2.8	0	0	0	0	0	0	0	1	0	0	0	0	0	0	0	0
0	0	0	0	0	286	0	4.99726	0	0	0	0	0	0	0	1	0	0	0	0	0	0	0	0
0	0	0	0	0	2152	0	0.805479	0	0	0	0	0	0	0	0.805479	0	0	0	0	0	0	0	0
0	0	0	0	0	2781	0	3.82192	0	0	0	0	0	0	0	1	0	0	0	0	0	0	0	0
0	0	0	0	0	2814	0	0.805479	0	0	0	0	0	0	0	0.805479	0	0	0	0	0	0	0	0
0	0	0	0	0	4230	0	3.9863	0	0	0	0	0	0	0	1	0	0	0	0	0	0	0	0
0	0	0	0	0	1456	0	1.99178	0	0	0	0	0	0	0	1	0	0	0	0	0	0	0	0
0	0	0	0	0	1221	0	1.99178	0	0	0	0	20	1	0	1	0	0	0	0	0	0	0	0
0	0	0	0	0	5084	0	3.96986	0	0	0	0	0	0	0	1	0	0	0	0	0	0	0	0
0	0	0	0	0	2826	0	4.6	0	0	0	0	0	0	0	1	0	0	0	0	0	0	0	0
0	0	0	0	0	2864	0	3.78356	0	0	0	0	15	1	0	1	0	0	0	0	0	0	0	0
0	0	0	0	0	619	0	1.8411	0	0	0	0	0	0	0	1	0	0	0	0	0	0	0	0
0	0	0	0	0	3952	0	1.99726	0	0	0	0	0	0	0	1	0	0	0	0	0	0	0	0
0	0	0	0	0	968	0	1.99726	0	0	0	0	0	0	0	1	0	0	0	0	0	0	0	0
0	0	0	0	0	5945	0	5.89863	0	0	0	0	0	0	0	1	0	0	0	0	0	0	0	0
0	0	0	0	0	388	0	0.567123	0	0	0	0	0	0	0	0.567123	0	0	0	0	0	0	0	0
0	0	0	0	0	1812	0	5.97808	0	0	0	0	7.5	1	0	1	0	0	0	0	0	0	0	0
0	0	0	0	0	2862	0	1.92603	0	0	0	0	20	1	0	1	0	0	0	0	0	0	0	0
0	0	0	0	0	1832	0	2.98082	0	0	0	0	15	1	0	1	0	0	0	0	0	0	0	0
0	0	0	0	0	5678	0	0.0547945	0	0	0	0	0	0	0	0.0547945	0	0	0	0	0	0	0	0
0	0	0	0	0	5903	0	1.92603	0	0	0	0	0	0	0	1	0	0	0	0	0	0	0	0
0	0	0	0	0	183	0	0.808219	0	0	0	0	0	0	0	0.808219	0	0	0	0	0	0	0	0
0	0	0	0	0	2112	0	0.991781	0	0	0	0	0	0	0	0.991781	0	0	0	0	0	0	0	0
0	0	0	0	0	5329	0	3.20274	0	0	0	0	0	0	0	1	0	0	0	0	0	0	0	0
0	0	0	0	0	1747	0	2.97808	0	0	0	0	0	0	0	1	0	0	0	0	0	0	0	0
0	0	0	0	0	1254	0	5.91781	0	0	0	0	0	0	0	1	0	0	0	0	0	0	0	0
0	0	0	0	0	4519	0	4.98082	0	0	0	0	15	1	0	1	0	0	0	0	0	0	0	0
0	0	0	0	0	2050	0	2.83014	0	0	0	0	0	0	0	1	0	0	0	0	0	0	0	0
0	0	0	0	0	5438	0	5.00274	0	0	0	0	0	0	0	1	0	0	0	0	0	0	0	0
0	0	0	0	0	1828	0	0.978082	0	0	0	0	0	0	0	0.978082	0	0	0	0	0	0	0	0
0	0	0	0	0	6181	0	4.20822	0	0	0	0	15	1	0	1	0	0	0	0	0	0	0	0
0	0	0	0	0	2553	0	0.682192	0	0	0	0	0	0	0	0.682192	0	0	0	0	0	0	0	0
0	0	0	0	0	372	0	3.61644	0	0	0	0	0	0	0	1	0	0	0	0	0	0	0	0
0	0	0	0	0	4917	0	1.9863	0	0	0	0	0	0	0	1	0	0	0	0	0	0	0	0
0	0	0	0	0	4235	0	0.621918	0	0	0	0	0	0	0	0.621918	0	0	0	0	0	0	0	0
0	0	0	0	0	5922	0	2.94795	0	0	0	0	0	0	0	1	0	0	0	0	0	0	0	0
0	0	0	0	0	741	0	0.953425	0	0	0	0	0	0	0	0.953425	0	0	0	0	0	0	0	0
0	0	0	0	0	834	0	3.95068	0	0	0	0	8.57143	1	0	1	0	0	0	0	0	0	0	0
0	0	0	0	0	3338	0	1.79178	0	0	0	0	0	0	0	1	0	0	0	0	0	0	0	0
0	0	0	0	0	4493	0	4.93699	0	0	0	0	0	0	0	1	0	0	0	0	0	0	0	0
0	0	0	0	0	4126	0	3.92329	0	0	0	0	15	1	0	1	0	0	0	0	0	0	0	0
0	0	0	0	0	1787	0	3.90411	0	0	0	0	0	0	0	1	0	0	0	0	0	0	0	0
0	0	0	0	0	3334	0	4.9863	0	0	0	0	0	0	0	1	0	0	0	0	0	0	0	0
0	0	0	0	0	166	0	4.76986	0	0	0	0	0	0	0	1	0	0	0	0	0	0	0	0
0	0	0	0	0	1403	0	0.780822	0	0	0	0	0	0	0	0.780822	0	0	0	0	0	0	0	0
0	0	0	0	0	3215	0	3.96164	0	0	0	0	0	0	0	1	0	0	0	0	0	0	0	0
0	0	0	0	0	5599	0	5.33973	0	0	0	0	0	0	0	1	0	0	0	0	0	0	0	0
0	0	0	0	0	2993	0	4.9863	0	0	0	0	15	1	0	1	0	0	0	0	0	0	0	0
0	0	0	0	0	3618	0	4.99726	0	0	0	0	0	0	0	1	0	0	0	0	0	0	0	0
0	0	0	0	0	2952	0	0.854795	0	0	0	0	0	0	0	0.854795	0	0	0	0	0	0	0	0
0	0	0	0	0	5217	0	2.99726	0	0	0	0	10	1	0	1	0	0	0	0	0	0	0	0
0	0	0	0	0	4844	0	0.863014	0	0	0	0	0	0	0	0.863014	0	0	0	0	0	0	0	0
0	0	0	0	0	3639	0	2.95342	0	0	0	0	0	0	0	1	0	0	0	0	0	0	0	0
0	0	0	0	0	5059	0	3.9589	0	0	0	0	9.375	1	0	1	0	0	0	0	0	0	0	0
0	0	0	0	0	4651	0	4.96712	0	0	0	0	15	1	0	1	0	0	0	0	0	0	0	0
0	0	0	0	0	4897	0	0.863014	0	0	0	0	0	0	0	0.863014	0	0	0	0	0	0	0	0
0	0	0	0	0	4399	0	2.95068	0	0	0	0	23.6842	1	0	1	0	0	0	0	0	0	0	0
0	0	0	0	0	1890	0	2.96712	1	0	0	1	5.37037	1	0	1	0	0	0	0	0	0	0	0
0	0	0	0	0	5833	0	5.99726	0	0	0	0	0	0	0	1	0	0	0	0	0	0	0	0
0	0	0	0	0	2705	0	4.46575	0	0	0	0	0	0	0	1	0	0	0	0	0	0	0	0
0	0	0	0	0	756	0	0.99726	0	0	0	0	0	0	0	0.99726	0	0	0	0	0	0	0	0
0	0	0	0	0	2910	0	3.8137	0	0	0	0	0	0	0	1	0	0	0	0	0	0	0	0
0	0	0	0	0	5699	0	0.849315	0	0	0	0	0	0	0	0.849315	0	0	0	0	0	0	0	0
0	0	0	0	0	3062	0	0.824658	0	0	0	0	0	0	0	0.824658	0	0	0	0	0	0	0	0
0	0	0	0	0	1364	0	4.99452	0	0	0	0	0	0	0	1	0	0	0	0	0	0	0	0
0	0	0	0	0	5025	0	4.76986	0	0	0	0	20	1	0	1	0	0	0	0	0	0	0	0
0	0	0	0	0	5595	0	1.99726	0	0	0	0	0	0	0	1	0	0	0	0	0	0	0	0
0	0	0	0	0	5173	0	3.93699	0	0	0	0	0	0	0	1	0	0	0	0	0	0	0	0
0	0	0	0	0	1260	0	0.953425	0	0	0	0	0	0	0	0.953425	0	0	0	0	0	0	0	0
0	0	0	0	0	4839	0	2.90137	0	0	0	0	19	1	0	1	0	0	0	0	0	0	0	0
0	0	0	0	0	1241	0	3.98904	0	0	0	0	0	0	0	1	0	0	0	0	0	0	0	0
0	0	0	0	0	1921	0	3	0	0	0	0	24.1667	1	0	1	0	0	0	0	0	0	0	0
0	0	0	0	0	1439	0	3.96712	0	0	0	0	0	0	0	1	0	0	0	0	0	0	0	0
0	0	0	0	0	134	0	5.80822	0	0	0	0	10	1	0	1	0	0	0	0	0	0	0	0
0	0	0	0	0	5788	0	1	0	0	0	0	0	0	0	1	0	0	0	0	0	0	0	0
0	0	0	0	0	199	0	1.71781	0	0	0	0	0	0	0	1	0	0	0	0	0	0	0	0
0	0	0	0	0	2140	0	4.76712	0	0	0	0	0	0	0	1	0	0	0	0	0	0	0	0
0	0	0	0	0	3591	0	5.87671	0	0	0	0	0	0	0	1	0	0	0	0	0	0	0	0
0	0	0	0	0	1769	0	4.98082	0	0	0	0	0	0	0	1	0	0	0	0	0	0	0	0
0	0	0	0	0	3257	0	3.75342	0	0	0	0	0	0	0	1	0	0	0	0	0	0	0	0
0	0	0	0	0	2781	0	3.33425	0	0	0	0	0	0	0	1	0	0	0	0	0	0	0	0
0	0	0	0	0	6527	0	3.99452	0	0	0	0	0	0	0	1	0	0	0	0	0	0	0	0
0	0	0	0	0	3269	0	2	0	0	0	0	0	0	0	1	0	0	0	0	0	0	0	0
0	0	0	0	0	2319	0	5.92055	0	0	0	0	0	0	0	1	0	0	0	0	0	0	0	0
0	0	0	0	0	4754	0	1.83836	0	0	0	0	0	0	0	1	0	0	0	0	0	0	0	0
0	0	0	0	0	5248	0	3.99726	0	0	0	0	0	0	0	1	0	0	0	0	0	0	0	0
0	0	0	0	0	2888	0	4.88493	0	0	0	0	2.85714	1	0	1	0	0	0	0	0	0	0	0
0	0	0	0	0	5538	0	4.80822	0	0	0	0	14	1	0	1	0	0	0	0	0	0	0	0
0	0	0	0	0	5855	0	4.9863	0	0	0	0	16.6667	1	0	1	0	0	0	0	0	0	0	0
0	0	0	0	0	2466	0	2.99726	0	0	0	0	0	0	0	1	0	0	0	0	0	0	0	0
0	0	0	0	0	550	0	2.33973	0	0	0	0	0	0	0	1	0	0	0	0	0	0	0	0
0	0	0	0	0	3625	0	4.93973	0	0	0	0	20	1	0	1	0	0	0	0	0	0	0	0
0	0	0	0	0	3024	0	4.99452	0	0	0	0	15	1	0	1	0	0	0	0	0	0	0	0
0	0	0	0	0	1952	0	2.98082	0	0	0	0	7.5	1	0	1	0	0	0	0	0	0	0	0
0	0	0	0	0	1701	0	5.95616	0	0	0	0	24.375	1	0	1	0	0	0	0	0	0	0	0
0	0	0	0	0	4148	0	5.79178	0	0	0	0	0	0	0	1	0	0	0	0	0	0	0	0
0	0	0	0	0	1777	0	2.8274	0	0	0	0	0	0	0	1	0	0	0	0	0	0	0	0
0	0	0	0	0	6252	0	3.37534	0	0	0	0	0	0	0	1	0	0	0	0	0	0	0	0
0	0	0	0	0	823	0	5.99726	0	0	0	0	10	1	0	1	0	0	0	0	0	0	0	0
0	0	0	0	0	2239	0	5.66301	0	0	0	0	0	0	0	1	0	0	0	0	0	0	0	0
0	0	0	0	0	5237	0	2.92055	0	0	0	0	15	1	0	1	0	0	0	0	0	0	0	0
0	0	0	0	0	760	0	3.91233	0	0	0	0	0	0	0	1	0	0	0	0	0	0	0	0
0	0	0	0	0	6198	0	4.75616	0	0	0	0	0	0	0	1	0	0	0	0	0	0	0	0
0	0	0	0	0	4657	0	2.81644	0	0	0	0	37.5	1	0	1	0	0	0	0	0	0	0	0
0	0	0	0	0	4978	0	1.97534	0	0	0	0	0	0	0	1	0	0	0	0	0	0	0	0
0	0	0	0	0	1651	0	5.87671	0	0	0	0	0	0	0	1	0	0	0	0	0	0	0	0
0	0	0	0	0	4259	0	5.4137	0	0	0	0	0	0	0	1	0	0	0	0	0	0	0	0
0	0	0	0	0	366	0	0.986301	0	0	0	0	0	0	0	0.986301	0	0	0	0	0	0	0	0
0	0	0	0	0	2304	0	0.920548	0	0	0	0	0	0	0	0.920548	0	0	0	0	0	0	0	0
0	0	0	0	0	2045	0	4.93425	0	0	0	0	0	0	0	1	0	0	0	0	0	0	0	0
0	0	0	0	0	3638	0	5.94521	0	0	0	0	0	0	0	1	0	0	0	0	0	0	0	0
0	0	0	0	0	3296	0	1.95342	0	0	0	0	0	0	0	1	0	0	0	0	0	0	0	0
0	0	0	0	0	635	0	3.99452	0	0	0	0	5	1	0	1	0	0	0	0	0	0	0	0
0	0	0	0	0	1338	0	0.747945	0	0	0	0	0	0	0	0.747945	0	0	0	0	0	0	0	0
0	0	0	0	0	1368	0	6	0	0	0	0	0	0	0	1	0	0	0	0	0	0	0	0
0	0	0	0	0	4212	0	2.62466	0	0	0	0	0	0	0	1	0	0	0	0	0	0	0	0
0	0	0	0	0	1254	0	5.98356	0	0	1	1	13.7393	1	0	1	0	0	0	0	0	0	0	0
0	0	0	0	0	1675	0	0.476712	0	0	0	0	0	0	0	0.476712	0	0	0	0	0	0	0	0
0	0	0	0	0	1211	0	4.94795	0	0	0	0	0	0	0	1	0	0	0	0	0	0	0	0
0	0	0	0	0	1440	0	0.950685	0	0	0	0	0	0	0	0.950685	0	0	0	0	0	0	0	0
0	0	0	0	0	3706	0	5.61096	0	0	0	0	0	0	0	1	0	0	0	0	0	0	0	0
0	0	0	0	0	4460	0	5	0	0	0	0	11.022	1	0	1	0	0	0	0	0	0	0	0
0	0	0	0	0	5616	0	5.73151	0	0	0	0	7.5	1	0	1	0	0	0	0	0	0	0	0
0	0	0	0	0	6275	0	4.93425	0	0	0	0	0	0	0	1	0	0	0	0	0	0	0	0
0	0	0	0	0	427	0	2.98904	0	0	0	0	0	0	0	1	0	0	0	0	0	0	0	0
0	0	0	0	0	2457	0	2.30137	0	0	0	0	15	1	0	1	0	0	0	0	0	0	0	0
0	0	0	0	0	900	0	4.86301	0	0	0	0	0	0	0	1	0	0	0	0	0	0	0	0
0	0	0	0	0	6376	0	2.92877	0	0	0	0	0	0	0	1	0	0	0	0	0	0	0	0
0	0	0	0	0	3110	0	0.19726	0	0	0	0	0	0	0	0.19726	0	0	0	0	0	0	0	0
0	0	0	0	0	1849	0	4.96712	0	0	0	0	0	0	0	1	0	0	0	0	0	0	0	0
0	0	0	0	0	1504	0	0.178082	0	0	0	0	0	0	0	0.178082	0	0	0	0	0	0	0	0
0	0	0	0	0	4723	0	4.73699	0	0	0	0	7.5	1	0	1	0	0	0	0	0	0	0	0
0	0	0	0	0	1968	0	0.961644	0	0	0	0	0	0	0	0.961644	0	0	0	0	0	0	0	0
0	0	0	0	0	1567	0	1.98904	0	0	0	0	0	0	0	1	0	0	0	0	0	0	0	0
0	0	0	0	0	1212	0	5.51507	0	0	0	0	0	0	0	1	0	0	0	0	0	0	0	0
0	0	0	0	0	685	0	5.94247	0	0	0	0	0	0	0	1	0	0	0	0	0	0	0	0
0	0	0	0	0	1567	0	1.7726	0	0	0	0	20	1	0	1	0	0	0	0	0	0	0	0
0	0	0	0	0	3396	0	3.98356	0	0	0	0	0	0	0	1	0	0	0	0	0	0	0	0
0	0	0	0	0	645	0	4.23288	0	0	0	0	0	0	0	1	0	0	0	0	0	0	0	0
0	0	0	0	0	3886	0	1.70411	0	0	0	0	0	0	0	1	0	0	0	0	0	0	0	0
0	0	0	0	0	5025	0	4.77534	0	0	0	0	0	0	0	1	0	0	0	0	0	0	0	0
0	0	0	0	0	2802	0	5.61096	0	0	0	0	0	0	0	1	0	0	0	0	0	0	0	0
0	0	0	0	0	3198	0	4.96712	0	0	0	0	22.5	1	0	1	0	0	0	0	0	0	0	0
0	0	0	0	0	3030	0	4.95342	0	0	0	0	7.5	1	0	1	0	0	0	0	0	0	0	0
0	0	0	0	0	755	0	3.97534	0	0	0	0	22.5	1	0	1	0	0	0	0	0	0	0	0
0	0	0	0	0	4491	0	0.99726	0	0	0	0	0	0	0	0.99726	0	0	0	0	0	0	0	0
0	0	0	0	0	1183	0	3.35342	0	0	0	0	0	0	0	1	0	0	0	0	0	0	0	0
0	0	0	0	0	1176	0	0.668493	0	0	0	0	0	0	0	0.668493	0	0	0	0	0	0	0	0
0	0	0	0	0	6550	0	5.10685	0	0	0	0	0	0	0	1	0	0	0	0	0	0	0	0
0	0	0	0	0	651	0	4.95616	0	0	0	0	23.3333	1	0	1	0	0	0	0	0	0	0	0
0	0	0	0	0	5435	0	2.39178	0	0	0	0	0	0	0	1	0	0	0	0	0	0	0	0
0	0	0	0	0	2404	0	3.89315	0	0	0	0	15	1	0	1	0	0	0	0	0	0	0	0
0	0	0	0	0	891	0	0.947945	0	0	0	0	0	0	0	0.947945	0	0	0	0	0	0	0	0
0	0	0	0	0	5084	0	3.90959	0	0	0	0	0	0	0	1	0	0	0	0	0	0	0	0
0	0	0	0	0	2390	0	1.96712	0	0	0	0	0	0	0	1	0	0	0	0	0	0	0	0
0	0	0	0	0	4345	0	0.989041	0	0	0	0	0	0	0	0.989041	0	0	0	0	0	0	0	0
0	0	0	0	0	6439	0	0.956164	0	0	0	0	0	0	0	0.956164	0	0	0	0	0	0	0	0
0	0	0	0	0	127	0	5.92329	0	0	0	0	0	0	0	1	0	0	0	0	0	0	0	0
0	0	0	0	0	3963	0	3.39452	0	0	0	0	0	0	0	1	0	0	0	0	0	0	0	0
0	0	0	0	0	2405	0	1.92877	0	0	0	0	0	0	0	1	0	0	0	0	0	0	0	0
0	0	0	0	0	2836	0	5.99452	0	0	0	0	21.875	1	0	1	0	0	0	0	0	0	0	0
0	0	0	0	0	5771	0	1.57808	0	0	0	0	0	0	0	1	0	0	0	0	0	0	0	0
0	0	0	0	0	538	0	1.99178	0	0	0	0	0	0	0	1	0	0	0	0	0	0	0	0
0	0	0	0	0	141	0	0.953425	0	0	0	0	0	0	0	0.953425	0	0	0	0	0	0	0	0
0	0	0	0	0	4316	0	0.969863	0	0	0	0	0	0	0	0.969863	0	0	0	0	0	0	0	0
0	0	0	0	0	2573	0	1.32877	0	0	0	0	0	0	0	1	0	0	0	0	0	0	0	0
0	0	0	0	0	4876	0	2.26301	0	0	0	0	0	0	0	1	0	0	0	0	0	0	0	0
0	0	0	0	0	880	0	2.66575	0	0	0	0	0	0	0	1	0	0	0	0	0	0	0	0
0	0	0	0	0	76	0	2.90685	0	0	0	0	8.5	1	0	1	0	0	0	0	0	0	0	0
0	0	0	0	0	2352	0	2.98356	0	0	0	0	0	0	0	1	0	0	0	0	0	0	0	0
0	0	0	0	0	3168	0	5.95616	0	0	0	0	0	0	0	1	0	0	0	0	0	0	0	0
0	0	0	0	0	2988	0	3.9589	0	0	0	0	0	0	0	1	0	0	0	0	0	0	0	0
0	0	0	0	0	4610	0	1.99178	0	0	0	0	0	0	0	1	0	0	0	0	0	0	0	0
0	0	0	0	0	6322	0	4.91781	0	0	0	0	0	0	0	1	0	0	0	0	0	0	0	0
0	0	0	0	0	361	0	4.99726	0	0	0	0	45	1	0	1	0	0	0	0	0	0	0	0
0	0	0	0	0	2382	0	5.65753	0	0	0	0	30	1	0	1	0	0	0	0	0	0	0	0
0	0	0	0	0	2564	0	0.854795	0	0	0	0	0	0	0	0.854795	0	0	0	0	0	0	0	0
0	0	0	0	0	2014	0	0.528767	0	0	0	0	0	0	0	0.528767	0	0	0	0	0	0	0	0
0	0	0	0	0	2517	0	2.96164	0	0	0	0	22.5	1	0	1	0	0	0	0	0	0	0	0
0	0	0	0	0	5372	0	5.89863	0	0	0	0	19.1129	1	0	1	0	0	0	0	0	0	0	0
0	0	0	0	0	3030	0	4.99452	0	0	0	0	0	0	0	1	0	0	0	0	0	0	0	0
0	0	0	0	0	3836	0	3.98082	0	0	0	0	0	0	0	1	0	0	0	0	0	0	0	0
0	0	0	0	0	3686	0	1.83836	0	0	0	0	0	0	0	1	0	0	0	0	0	0	0	0
0	0	0	0	0	3278	0	3.53973	0	0	0	0	0	0	0	1	0	0	0	0	0	0	0	0
0	0	0	0	0	3192	0	3.77534	0	0	0	0	0	0	0	1	0	0	0	0	0	0	0	0
0	0	0	0	0	489	0	0.99726	0	0	0	0	0	0	0	0.99726	0	0	0	0	0	0	0	0
0	0	0	0	0	2456	0	1.74521	0	0	0	0	0	0	0	1	0	0	0	0	0	0	0	0
0	0	0	0	0	812	0	0.991781	0	0	0	0	0	0	0	0.991781	0	0	0	0	0	0	0	0
0	0	0	0	0	2607	0	3.95068	0	0	0	0	0	0	0	1	0	0	0	0	0	0	0	0
0	0	0	0	0	1468	0	2.68219	0	0	0	0	0	0	0	1	0	0	0	0	0	0	0	0
0	0	0	0	0	6549	0	3.6411	0	0	0	0	0	0	0	1	0	0	0	0	0	0	0	0
0	0	0	0	0	4380	0	1.79178	0	0	0	0	15	1	0	1	0	0	0	0	0	0	0	0
0	0	0	0	0	1286	0	5.93151	0	0	0	0	0	0	0	1	0	0	0	0	0	0	0	0
0	0	0	0	0	4008	0	2.97808	0	0	0	0	7.5	1	0	1	0	0	0	0	0	0	0	0
0	0	0	0	0	2604	0	2.93425	0	0	0	0	0	0	0	1	0	0	0	0	0	0	0	0
0	0	0	0	0	667	0	2.85479	0	0	0	0	0	0	0	1	0	0	0	0	0	0	0	0
0	0	0	0	0	5248	0	3.47945	0	0	0	0	0	0	0	1	0	0	0	0	0	0	0	0
0	0	0	0	0	1307	0	4.29589	0	0	0	0	0	0	0	1	0	0	0	0	0	0	0	0
0	0	0	0	0	1230	0	2.92055	0	0	0	0	0	0	0	1	0	0	0	0	0	0	0	0
0	0	0	0	0	6498	0	1.95616	0	0	0	0	0	0	0	1	0	0	0	0	0	0	0	0
0	0	0	0	0	2603	0	1.87671	0	0	0	0	0	0	0	1	0	0	0	0	0	0	0	0
0	0	0	0	0	4492	0	0.942466	0	0	0	0	0	0	0	0.942466	0	0	0	0	0	0	0	0
0	0	0	0	0	2588	0	4.87945	0	0	0	0	10	1	0	1	0	0	0	0	0	0	0	0
0	0	0	0	0	2898	0	4.95068	0	0	0	0	21.2094	1	0	1	0	0	0	0	0	0	0	0
0	0	0	0	0	4499	0	5.95342	0	0	0	0	0	0	0	1	0	0	0	0	0	0	0	0
0	0	0	0	0	3257	0	3.94521	0	0	0	0	12.5	1	0	1	0	0	0	0	0	0	0	0
0	0	0	0	0	3692	0	0.706849	0	0	0	0	0	0	0	0.706849	0	0	0	0	0	0	0	0
0	0	0	0	0	3560	0	0.945205	0	0	0	0	0	0	0	0.945205	0	0	0	0	0	0	0	0
0	0	0	0	0	1471	0	0.994521	0	0	0	0	0	0	0	0.994521	0	0	0	0	0	0	0	0
0	0	0	0	0	1807	0	5.86027	0	0	0	0	17.5	1	0	1	0	0	0	0	0	0	0	0
0	0	0	0	0	3816	0	5.95616	0	0	0	0	0	0	0	1	0	0	0	0	0	0	0	0
0	0	0	0	0	6316	0	3.72055	0	0	0	0	0	0	0	1	0	0	0	0	0	0	0	0
0	0	0	0	0	4857	0	3.89041	0	0	0	0	0	0	0	1	0	0	0	0	0	0	0	0
0	0	0	0	0	2095	0	1.13151	0	0	0	0	0	0	0	1	0	0	0	0	0	0	0	0
0	0	0	0	0	190	0	5.9726	0	0	0	0	0	0	0	1	0	0	0	0	0	0	0	0
0	0	0	0	0	3661	0	0.679452	0	0	0	0	0	0	0	0.679452	0	0	0	0	0	0	0	0
0	0	0	0	0	865	0	4.96712	0	0	0	0	0	0	0	1	0	0	0	0	0	0	0	0
0	0	0	0	0	1153	0	4.98082	0	0	0	0	15	1	0	1	0	0	0	0	0	0	0	0
0	0	0	0	0	995	0	0.805479	0	0	0	0	0	0	0	0.805479	0	0	0	0	0	0	0	0
0	0	0	0	0	4171	0	1.60274	0	0	0	0	0	0	0	1	0	0	0	0	0	0	0	0
0	0	0	0	0	6012	0	3.98904	0	0	0	0	5	1	0	1	0	0	0	0	0	0	0	0
0	0	0	0	0	3262	0	4.99452	0	0	0	0	10	1	0	1	0	0	0	0	0	0	0	0
0	0	0	0	0	666	0	5.99452	0	0	0	0	0	0	0	1	0	0	0	0	0	0	0	0
0	0	0	0	0	4857	0	3.99452	0	0	0	0	21.25	1	0	1	0	0	0	0	0	0	0	0
0	0	0	0	0	3822	0	0.882192	0	0	0	0	0	0	0	0.882192	0	0	0	0	0	0	0	0
0	0	0	0	0	5636	0	5.84384	0	0	0	0	5	1	0	1	0	0	0	0	0	0	0	0
0	0	0	0	0	3243	0	5	0	0	0	0	15	1	0	1	0	0	0	0	0	0	0	0
0	0	0	0	0	6233	0	2	0	0	0	0	0	0	0	1	0	0	0	0	0	0	0	0
0	0	0	0	0	3890	0	3.74247	0	0	0	0	12.5	1	0	1	0	0	0	0	0	0	0	0
0	0	0	0	0	5411	0	5.88219	0	0	0	0	11.25	1	0	1	0	0	0	0	0	0	0	0
0	0	0	0	0	5590	0	0.627397	0	0	0	0	0	0	0	0.627397	0	0	0	0	0	0	0	0
0	0	0	0	0	3811	0	1.8	0	0	0	0	3.57143	1	0	1	0	0	0	0	0	0	0	0
0	0	0	0	0	2887	0	2	0	0	0	0	7.5	1	0	1	0	0	0	0	0	0	0	0
0	0	0	0	0	1643	0	1.89589	0	0	0	0	0	0	0	1	0	0	0	0	0	0	0	0
0	0	0	0	0	4601	0	2.80822	0	0	0	0	30	1	0	1	0	0	0	0	0	0	0	0
0	0	0	0	0	6412	0	1.87945	0	0	0	0	0	0	0	1	0	0	0	0	0	0	0	0
0	0	0	0	0	4244	0	5.63288	0	0	0	0	0	0	0	1	0	0	0	0	0	0	0	0
0	0	0	0	0	4876	0	2.81918	0	0	0	0	0	0	0	1	0	0	0	0	0	0	0	0
0	0	0	0	0	1221	0	1.94795	0	0	0	0	0	0	0	1	0	0	0	0	0	0	0	0
0	0	0	0	0	5691	0	4.97534	0	0	0	0	0	0	0	1	0	0	0	0	0	0	0	0
0	0	0	0	0	5037	0	3.49041	0	0	0	0	0	0	0	1	0	0	0	0	0	0	0	0
0	0	0	0	0	4610	0	1.93151	0	0	0	0	0	0	0	1	0	0	0	0	0	0	0	0
0	0	0	0	0	1088	0	2.71781	0	0	0	0	0	0	0	1	0	0	0	0	0	0	0	0
0	0	0	0	0	5959	0	1.9863	0	0	0	0	0	0	0	1	0	0	0	0	0	0	0	0
0	0	0	0	0	4805	0	2.66575	0	0	0	0	0	0	0	1	0	0	0	0	0	0	0	0
0	0	0	0	0	2283	0	5.90685	0	0	0	0	0	0	0	1	0	0	0	0	0	0	0	0
0	0	0	0	0	1848	0	3.98904	0	0	0	0	9.25	1	0	1	0	0	0	0	0	0	0	0
0	0	0	0	0	1986	0	4.01918	0	0	0	0	0	0	0	1	0	0	0	0	0	0	0	0
0	0	0	0	0	6138	0	3.27945	0	0	0	0	0	0	0	1	0	0	0	0	0	0	0	0
0	0	0	0	0	3095	0	0.419178	0	0	0	0	0	0	0	0.419178	0	0	0	0	0	0	0	0
0	0	0	0	0	5228	0	2.86575	0	0	0	0	0	0	0	1	0	0	0	0	0	0	0	0
0	0	0	0	0	3251	0	5.9726	0	0	0	0	0	0	0	1	0	0	0	0	0	0	0	0
0	0	0	0	0	3863	0	5.9863	0	0	0	0	35.7143	1	0	1	0	0	0	0	0	0	0	0
0	0	0	0	0	6024	0	2.24384	0	0	0	0	0	0	0	1	0	0	0	0	0	0	0	0
0	0	0	0	0	2920	0	5.68493	0	0	0	0	6.25	1	0	1	0	0	0	0	0	0	0	0
0	0	0	0	0	495	0	5.36712	0	0	0	0	0	0	0	1	0	0	0	0	0	0	0	0
0	0	0	0	0	1769	0	5	0	0	0	0	0	0	0	1	0	0	0	0	0	0	0	0
0	0	0	0	0	2050	0	2.93973	0	0	0	0	0	0	0	1	0	0	0	0	0	0	0	0
0	0	0	0	0	2390	0	1.99178	0	0	0	0	0	0	0	1	0	0	0	0	0	0	0	0
0	0	0	0	0	6170	0	5	0	0	0	0	15	1	0	1	0	0	0	0	0	0	0	0
0	0	0	0	0	1855	0	0.868493	0	0	0	0	0	0	0	0.868493	0	0	0	0	0	0	0	0
0	0	0	0	0	2644	0	0.887671	0	0	0	0	0	0	0	0.887671	0	0	0	0	0	0	0	0
0	0	0	0	0	2383	0	0.854795	0	0	0	0	0	0	0	0.854795	0	0	0	0	0	0	0	0
0	0	0	0	0	3557	0	0.967123	0	0	0	0	0	0	0	0.967123	0	0	0	0	0	0	0	0
0	0	0	0	0	1435	0	2.96712	0	0	0	0	0	0	0	1	0	0	0	0	0	0	0	0
0	0	0	0	0	5741	0	5.71507	0	0	0	0	0	0	0	1	0	0	0	0	0	0	0	0
0	0	0	0	0	306	0	4.87123	0	0	0	0	15	1	0	1	0	0	0	0	0	0	0	0
0	0	0	0	0	292	0	4.18904	0	0	0	0	0	0	0	1	0	0	0	0	0	0	0	0
0	0	0	0	0	4810	0	5.89315	0	0	0	0	0	0	0	1	0	0	0	0	0	0	0	0
0	0	0	0	0	2108	0	2.88493	0	0	0	0	0	0	0	1	0	0	0	0	0	0	0	0
0	0	0	0	0	5502	0	5.94247	0	0	0	0	0	0	0	1	0	0	0	0	0	0	0	0
0	0	0	0	0	858	0	0.950685	0	0	0	0	0	0	0	0.950685	0	0	0	0	0	0	0	0
0	0	0	0	0	1730	0	1.98356	0	0	0	0	0	0	0	1	0	0	0	0	0	0	0	0
0	0	0	0	0	906	0	5.90137	0	0	0	0	0	0	0	1	0	0	0	0	0	0	0	0
0	0	0	0	0	4804	0	3.91781	0	0	0	0	22.5	1	0	1	0	0	0	0	0	0	0	0
0	0	0	0	0	3160	0	5.02466	0	0	0	0	0	0	0	1	0	0	0	0	0	0	0	0
0	0	0	0	0	5590	0	0.882192	0	0	0	0	0	0	0	0.882192	0	0	0	0	0	0	0	0
0	0	0	0	0	495	0	6	0	0	0	0	0	0	0	1	0	0	0	0	0	0	0	0
0	0	0	0	0	6243	0	0.989041	0	0	0	0	0	0	0	0.989041	0	0	0	0	0	0	0	0
0	0	0	0	0	1554	0	0.452055	0	0	0	0	0	0	0	0.452055	0	0	0	0	0	0	0	0
0	0	0	0	0	5820	0	1.94247	0	0	0	0	0	0	0	1	0	0	0	0	0	0	0	0
0	0	0	0	0	4491	0	0.958904	0	0	0	0	0	0	0	0.958904	0	0	0	0	0	0	0	0
0	0	0	0	0	5696	0	4.56438	0	0	0	0	0	0	0	1	0	0	0	0	0	0	0	0
0	0	0	0	0	5816	0	0.975342	0	0	0	0	0	0	0	0.975342	0	0	0	0	0	0	0	0
0	0	0	0	0	1348	0	2.98356	0	0	0	0	0	0	0	1	0	0	0	0	0	0	0	0
0	0	0	0	0	4914	0	3.9863	0	0	0	0	0	0	0	1	0	0	0	0	0	0	0	0
0	0	0	0	0	3213	0	5.25205	0	0	0	0	0	0	0	1	0	0	0	0	0	0	0	0
0	0	0	0	0	5172	0	1.99452	0	0	0	0	0	0	0	1	0	0	0	0	0	0	0	0
0	0	0	0	0	5768	0	1.99452	0	0	0	0	0	0	0	1	0	0	0	0	0	0	0	0
0	0	0	0	0	3718	0	1.89589	0	0	0	0	0	0	0	1	0	0	0	0	0	0	0	0
0	0	0	0	0	1135	0	2.9863	0	0	0	0	0	0	0	1	0	0	0	0	0	0	0	0
0	0	0	0	0	3245	0	1.43562	0	0	0	0	0	0	0	1	0	0	0	0	0	0	0	0
0	0	0	0	0	3753	0	4.09863	0	0	0	0	0	0	0	1	0	0	0	0	0	0	0	0
0	0	0	0	0	4230	0	3.98356	0	0	0	0	0	0	0	1	0	0	0	0	0	0	0	0
0	0	0	0	0	2334	0	0.99726	0	0	0	0	0	0	0	0.99726	0	0	0	0	0	0	0	0
0	0	0	0	0	4570	0	1.89041	0	0	0	0	0	0	0	1	0	0	0	0	0	0	0	0
0	0	0	0	0	3196	0	4.98082	0	0	0	0	0	0	0	1	0	0	0	0	0	0	0	0
0	0	0	0	0	575	0	2.93973	0	0	0	0	0	0	0	1	0	0	0	0	0	0	0	0
0	0	0	0	0	5080	0	2.15616	0	0	0	0	0	0	0	1	0	0	0	0	0	0	0	0
0	0	0	0	0	2634	0	3.80822	0	0	0	0	0	0	0	1	0	0	0	0	0	0	0	0
0	0	0	0	0	6470	0	4.99452	0	0	0	0	0	0	0	1	0	0	0	0	0	0	0	0
0	0	0	0	0	5531	0	1.81096	0	0	0	0	0	0	0	1	0	0	0	0	0	0	0	0
0	0	0	0	0	4952	0	4.8274	0	0	0	0	0	0	0	1	0	0	0	0	0	0	0	0
0	0	0	0	0	2836	0	5.84658	0	0	0	0	15	1	0	1	0	0	0	0	0	0	0	0
0	0	0	0	0	5915	0	3.9726	0	0	0	0	5	1	0	1	0	0	0	0	0	0	0	0
0	0	0	0	0	5729	0	3.88493	0	0	0	0	0	0	0	1	0	0	0	0	0	0	0	0
0	0	0	0	0	3977	0	2.97808	0	0	0	0	0	0	0	1	0	0	0	0	0	0	0	0
0	0	0	0	0	2302	0	2.82466	0	0	0	0	0	0	0	1	0	0	0	0	0	0	0	0
0	0	0	0	0	5375	0	2.45479	0	0	0	0	0	0	0	1	0	0	0	0	0	0	0	0
0	0	0	0	0	1231	0	5.0411	0	0	0	0	0	0	0	1	0	0	0	0	0	0	0	0
0	0	0	0	0	2947	0	0.975342	0	0	0	0	0	0	0	0.975342	0	0	0	0	0	0	0	0
0	0	0	0	0	5313	0	2.73699	0	0	0	0	0	0	0	1	0	0	0	0	0	0	0	0
0	0	0	0	0	4854	0	5.97808	0	0	0	0	28.5	1	0	1	0	0	0	0	0	0	0	0
0	0	0	0	0	4899	0	5	0	0	0	0	0	0	0	1	0	0	0	0	0	0	0	0
0	0	0	0	0	2601	0	3.91233	0	0	0	0	0	0	0	1	0	0	0	0	0	0	0	0
0	0	0	0	0	5310	0	3.30411	0	0	0	0	0	0	0	1	0	0	0	0	0	0	0	0
0	0	0	0	0	4517	0	1.93425	0	0	0	0	0	0	0	1	0	0	0	0	0	0	0	0
0	0	0	0	0	437	0	1.95342	0	0	0	0	15	1	0	1	0	0	0	0	0	0	0	0
0	0	0	0	0	4811	0	4.99726	0	0	0	0	0	0	0	1	0	0	0	0	0	0	0	0
0	0	0	0	0	3879	0	0.989041	0	0	0	0	0	0	0	0.989041	0	0	0	0	0	0	0	0
0	0	0	0	0	162	0	5.63836	0	0	0	0	9.375	1	0	1	0	0	0	0	0	0	0	0
0	0	0	0	0	1348	0	2.83836	0	0	0	0	0	0	0	1	0	0	0	0	0	0	0	0
0	0	0	0	0	2904	0	2.9863	0	0	0	0	0	0	0	1	0	0	0	0	0	0	0	0
0	0	0	0	0	1286	0	5.49863	0	0	0	0	0	0	0	1	0	0	0	0	0	0	0	0
0	0	0	0	0	3962	0	4.99726	0	0	0	0	20	1	0	1	0	0	0	0	0	0	0	0
0	0	0	0	0	1944	0	1.23288	0	0	0	0	0	0	0	1	0	0	0	0	0	0	0	0
0	0	0	0	0	3507	0	2.5863	0	0	0	0	0	0	0	1	0	0	0	0	0	0	0	0
0	0	0	0	0	4031	0	0.342466	0	0	0	0	0	0	0	0.342466	0	0	0	0	0	0	0	0
0	0	0	0	0	6288	0	0.917808	0	0	0	0	0	0	0	0.917808	0	0	0	0	0	0	0	0
0	0	0	0	0	4238	0	1.95068	0	0	0	0	0	0	0	1	0	0	0	0	0	0	0	0
0	0	0	0	0	2317	0	1.7726	0	0	0	0	0	0	0	1	0	0	0	0	0	0	0	0
0	0	0	0	0	3571	0	5.9726	0	0	0	0	0	0	0	1	0	0	0	0	0	0	0	0
0	0	0	0	0	5629	0	4.8274	0	0	0	0	18	1	0	1	0	0	0	0	0	0	0	0
0	0	0	0	0	555	0	0.986301	0	0	0	0	0	0	0	0.986301	0	0	0	0	0	0	0	0
0	0	0	0	0	6021	0	2.08767	0	0	0	0	0	0	0	1	0	0	0	0	0	0	0	0
0	0	0	0	0	4463	0	4.80548	0	0	0	0	0	0	0	1	0	0	0	0	0	0	0	0
0	0	0	0	0	6494	0	1.96712	0	0	0	0	0	0	0	1	0	0	0	0	0	0	0	0
0	0	0	0	0	4593	0	0.956164	0	0	0	0	0	0	0	0.956164	0	0	0	0	0	0	0	0
0	0	0	0	0	4501	0	4.97808	0	0	0	0	0	0	0	1	0	0	0	0	0	0	0	0
0	0	0	0	0	4753	0	0.920548	0	0	0	0	0	0	0	0.920548	0	0	0	0	0	0	0	0
0	0	0	0	0	4404	0	1.65479	0	0	0	0	0	0	0	1	0	0	0	0	0	0	0	0
0	0	0	0	0	5852	0	0.890411	0	0	0	0	0	0	0	0.890411	0	0	0	0	0	0	0	0
0	0	0	0	0	4046	0	1.92877	0	0	0	0	0	0	0	1	0	0	0	0	0	0	0	0
0	0	0	0	0	395	0	1.98356	0	0	0	0	0	0	0	1	0	0	0	0	0	0	0	0
0	0	0	0	0	1633	0	0.983562	0	0	0	0	0	0	0	0.983562	0	0	0	0	0	0	0	0
0	0	0	0	0	6024	0	2.69589	0	0	0	0	0	0	0	1	0	0	0	0	0	0	0	0
0	0	0	0	0	5852	0	0.745205	0	0	0	0	0	0	0	0.745205	0	0	0	0	0	0	0	0
0	0	0	0	0	4600	0	0.830137	0	0	0	0	0	0	0	0.830137	0	0	0	0	0	0	0	0
0	0	0	0	0	5344	0	0.863014	0	0	0	0	0	0	0	0.863014	0	0	0	0	0	0	0	0
0	0	0	0	0	1364	0	4.78904	0	0	0	0	0	0	0	1	0	0	0	0	0	0	0	0
0	0	0	0	0	1212	0	5.9589	0	0	0	0	0	0	0	1	0	0	0	0	0	0	0	0
0	0	0	0	0	5277	0	0.786301	0	0	0	0	0	0	0	0.786301	0	0	0	0	0	0	0	0
0	0	0	0	0	5114	0	1.96986	0	0	0	0	0	0	0	1	0	0	0	0	0	0	0	0
0	0	0	0	0	2563	0	3.29589	0	0	0	0	0	0	0	1	0	0	0	0	0	0	0	0
0	0	0	0	0	5124	0	5.87671	0	0	0	0	30	1	0	1	0	0	0	0	0	0	0	0
0	0	0	0	0	3642	0	3.99726	0	0	0	0	0	0	0	1	0	0	0	0	0	0	0	0
0	0	0	0	0	4085	0	1.87671	0	0	0	0	0	0	0	1	0	0	0	0	0	0	0	0
0	0	0	0	0	2019	0	0.753425	0	0	0	0	0	0	0	0.753425	0	0	0	0	0	0	0	0
0	0	0	0	0	6275	0	4.94795	0	0	0	0	0	0	0	1	0	0	0	0	0	0	0	0
0	0	0	0	0	2143	0	2.91507	0	0	0	0	0	0	0	1	0	0	0	0	0	0	0	0
0	0	0	0	0	3180	0	1.93699	0	0	0	0	0	0	0	1	0	0	0	0	0	0	0	0
0	0	0	0	0	2108	0	2.78082	0	0	0	0	0	0	0	1	0	0	0	0	0	0	0	0
0	0	0	0	0	2599	0	0.150685	0	0	0	0	0	0	0	0.150685	0	0	0	0	0	0	0	0
0	0	0	0	0	250	0	1.92877	0	0	0	0	0	0	0	1	0	0	0	0	0	0	0	0
0	0	0	0	0	4471	0	2.26027	0	0	0	0	0	0	0	1	0	0	0	0	0	0	0	0
0	0	0	0	0	527	0	1.86849	0	0	0	0	0	0	0	1	0	0	0	0	0	0	0	0
0	0	0	0	0	5071	0	2.98904	0	0	0	0	0	0	0	1	0	0	0	0	0	0	0	0
0	0	0	0	0	1594	0	5.98082	0	0	0	0	0	0	0	1	0	0	0	0	0	0	0	0
0	0	0	0	0	5262	0	2.91233	0	0	0	0	0	0	0	1	0	0	0	0	0	0	0	0
0	0	0	0	0	4096	0	5.93973	0	0	0	0	0	0	0	1	0	0	0	0	0	0	0	0
0	0	0	0	0	2660	0	5.87945	0	0	0	0	0	0	0	1	0	0	0	0	0	0	0	0
0	0	0	0	0	5972	0	0.917808	0	0	0	0	0	0	0	0.917808	0	0	0	0	0	0	0	0
0	0	0	0	0	6477	0	1.92055	0	0	0	0	0	0	0	1	0	0	0	0	0	0	0	0
0	0	0	0	0	2319	0	5.81918	0	0	0	0	0	0	0	1	0	0	0	0	0	0	0	0
0	0	0	0	0	2209	0	4.52329	0	0	0	0	0	0	0	1	0	0	0	0	0	0	0	0
0	0	0	0	0	3464	0	4.9863	0	0	0	0	0	0	0	1	0	0	0	0	0	0	0	0
0	0	0	0	0	2612	0	5.3863	0	0	0	0	0	0	0	1	0	0	0	0	0	0	0	0
0	0	0	0	0	5292	0	2.96164	0	0	0	0	0	0	0	1	0	0	0	0	0	0	0	0
0	0	0	0	0	1250	0	0.950685	0	0	0	0	0	0	0	0.950685	0	0	0	0	0	0	0	0
0	0	0	0	0	1960	0	3.97808	0	0	0	0	12.5	1	0	1	0	0	0	0	0	0	0	0
0	0	0	0	0	2669	0	3.95068	0	0	0	0	7.5	1	0	1	0	0	0	0	0	0	0	0
0	0	0	0	0	546	0	4.93973	0	0	0	0	0	0	0	1	0	0	0	0	0	0	0	0
0	0	0	0	0	1876	0	5.96164	0	0	0	0	0	0	0	1	0	0	0	0	0	0	0	0
0	0	0	0	0	1769	0	4.87123	0	0	0	0	0	0	0	1	0	0	0	0	0	0	0	0
0	0	0	0	0	5903	0	1.93425	0	0	0	0	0	0	0	1	0	0	0	0	0	0	0	0
0	0	0	0	0	2622	0	0.986301	0	0	0	0	0	0	0	0.986301	0	0	0	0	0	0	0	0
0	0	0	0	0	624	0	5.99726	0	0	0	0	0	0	0	1	0	0	0	0	0	0	0	0
0	0	0	0	0	4000	0	0.89863	0	0	0	0	0	0	0	0.89863	0	0	0	0	0	0	0	0
0	0	0	0	0	2938	0	3.80548	0	0	0	0	0	0	0	1	0	0	0	0	0	0	0	0
0	0	0	0	0	2232	0	3.98904	0	0	0	0	0	0	0	1	0	0	0	0	0	0	0	0
0	0	0	0	0	4545	0	5.97534	0	0	0	0	5	1	0	1	0	0	0	0	0	0	0	0
0	0	0	0	0	6324	0	1.54521	0	0	0	0	0	0	0	1	0	0	0	0	0	0	0	0
0	0	0	0	0	2131	0	5.76712	0	0	0	0	0	0	0	1	0	0	0	0	0	0	0	0
0	0	0	0	0	5922	0	2.77808	0	0	0	0	0	0	0	1	0	0	0	0	0	0	0	0
0	0	0	0	0	1730	0	1.83836	0	0	0	0	20	1	0	1	0	0	0	0	0	0	0	0
0	0	0	0	0	4560	0	5.93973	0	0	0	0	0	0	0	1	0	0	0	0	0	0	0	0
0	0	0	0	0	6016	0	5.99452	0	0	0	0	0	0	0	1	0	0	0	0	0	0	0	0
0	0	0	0	0	4972	0	4.97808	0	0	0	0	0	0	0	1	0	0	0	0	0	0	0	0
0	0	0	0	0	6104	0	0.947945	0	0	0	0	0	0	0	0.947945	0	0	0	0	0	0	0	0
0	0	0	0	0	6101	0	4.10959	0	0	0	0	0	0	0	1	0	0	0	0	0	0	0	0
0	0	0	0	0	1946	0	1.97534	0	0	0	0	0	0	0	1	0	0	0	0	0	0	0	0
0	0	0	0	0	2262	0	5	0	0	0	0	0	0	0	1	0	0	0	0	0	0	0	0
0	0	0	0	0	2319	0	5.87945	0	0	0	0	15	1	0	1	0	0	0	0	0	0	0	0
0	0	0	0	0	6301	0	3.91233	0	0	0	0	0	0	0	1	0	0	0	0	0	0	0	0
0	0	0	0	0	3042	0	4.42466	0	0	0	0	15	1	0	1	0	0	0	0	0	0	0	0
0	0	0	0	0	4499	0	6.00274	1	0	0	1	68.9924	1	0	1	0	0	0	0	0	0	0	0
0	0	0	0	0	3836	0	3.72055	0	0	0	0	10	1	0	1	0	0	0	0	0	0	0	0
0	0	0	0	0	4071	0	1.84658	0	0	0	0	0	0	0	1	0	0	0	0	0	0	0	0
0	0	0	0	0	2095	0	1.95342	0	0	0	0	0	0	0	1	0	0	0	0	0	0	0	0
0	0	0	0	0	6144	0	3.98082	0	0	0	0	0	0	0	1	0	0	0	0	0	0	0	0
0	0	0	0	0	4991	0	3.93425	0	0	0	0	0	0	0	1	0	0	0	0	0	0	0	0
0	0	0	0	0	5590	0	0.205479	0	0	0	0	0	0	0	0.205479	0	0	0	0	0	0	0	0
0	0	0	0	0	2699	0	3.99452	0	0	0	0	0	0	0	1	0	0	0	0	0	0	0	0
0	0	0	0	0	3747	0	3.90137	0	0	0	0	0	0	0	1	0	0	0	0	0	0	0	0
0	0	0	0	0	5404	0	4.99726	0	0	0	0	0	0	0	1	0	0	0	0	0	0	0	0
0	0	0	0	0	3560	0	0.917808	0	0	0	0	0	0	0	0.917808	0	0	0	0	0	0	0	0
0	0	0	0	0	2803	0	3.85479	0	0	0	0	0	0	0	1	0	0	0	0	0	0	0	0
0	0	0	0	0	3771	0	1.96712	0	0	0	0	0	0	0	1	0	0	0	0	0	0	0	0
0	0	0	0	0	4247	0	2.89041	0	0	0	0	0	0	0	1	0	0	0	0	0	0	0	0
0	0	0	0	0	4262	0	2.98904	0	0	0	0	0	0	0	1	0	0	0	0	0	0	0	0
0	0	0	0	0	1332	0	0.912329	0	0	0	0	0	0	0	0.912329	0	0	0	0	0	0	0	0
0	0	0	0	0	2109	0	5.98356	0	0	0	0	0	0	0	1	0	0	0	0	0	0	0	0
0	0	0	0	0	2833	0	4.81918	0	0	0	0	11.4286	1	0	1	0	0	0	0	0	0	0	0
0	0	0	0	0	4040	0	0.893151	0	0	0	0	0	0	0	0.893151	0	0	0	0	0	0	0	0
0	0	0	0	0	3903	0	2.91507	0	0	0	0	10	1	0	1	0	0	0	0	0	0	0	0
0	0	0	0	0	3251	0	5.98904	0	0	0	0	8.4375	1	0	1	0	0	0	0	0	0	0	0
0	0	0	0	0	2178	0	5.8411	0	0	0	0	0	0	0	1	0	0	0	0	0	0	0	0
0	0	0	0	0	4908	0	0.991781	0	0	0	0	0	0	0	0.991781	0	0	0	0	0	0	0	0
0	0	0	0	0	339	0	2.6411	0	0	0	0	0	0	0	1	0	0	0	0	0	0	0	0
0	0	0	0	0	1730	0	1.96438	0	0	0	0	0	0	0	1	0	0	0	0	0	0	0	0
0	0	0	0	0	2437	0	5.94521	0	0	0	0	0	0	0	1	0	0	0	0	0	0	0	0
0	0	0	0	0	5768	0	1.79726	0	0	0	0	0	0	0	1	0	0	0	0	0	0	0	0
0	0	0	0	0	3952	0	1.9726	0	0	0	0	0	0	0	1	0	0	0	0	0	0	0	0
0	0	0	0	0	1928	0	3.2274	0	0	0	0	29.1667	1	0	1	0	0	0	0	0	0	0	0
0	0	0	0	0	5906	0	2.91233	0	0	0	0	0	0	0	1	0	0	0	0	0	0	0	0
0	0	0	0	0	5769	0	1.96712	0	0	0	0	0	0	0	1	0	0	0	0	0	0	0	0
0	0	0	0	0	3848	0	5.64658	0	0	0	0	0	0	0	1	0	0	0	0	0	0	0	0
0	0	0	0	0	4699	0	0.0273973	0	0	0	0	0	0	0	0.0273973	0	0	0	0	0	0	0	0
0	0	0	0	0	1952	0	2.70137	0	0	0	0	0	0	0	1	0	0	0	0	0	0	0	0
0	0	0	0	0	5179	0	5.83562	0	0	0	0	0	0	0	1	0	0	0	0	0	0	0	0
0	0	0	0	0	3972	0	1.93151	0	0	0	0	0	0	0	1	0	0	0	0	0	0	0	0
0	0	0	0	0	2293	0	3.87123	0	0	0	0	0	0	0	1	0	0	0	0	0	0	0	0
0	0	0	0	0	2269	0	3.96986	0	0	0	0	10	1	0	1	0	0	0	0	0	0	0	0
0	0	0	0	0	4615	0	2.98904	0	0	0	0	0	0	0	1	0	0	0	0	0	0	0	0
0	0	0	0	0	981	0	0.975342	0	0	0	0	0	0	0	0.975342	0	0	0	0	0	0	0	0
0	0	0	0	0	2713	0	2.62466	0	0	0	0	0	0	0	1	0	0	0	0	0	0	0	0
0	0	0	0	0	4456	0	0.975342	0	0	0	0	0	0	0	0.975342	0	0	0	0	0	0	0	0
0	0	0	0	0	2039	0	2.81644	0	0	0	0	3.22917	1	0	1	0	0	0	0	0	0	0	0
0	0	0	0	0	6123	0	3.94795	0	0	0	0	0	0	0	1	0	0	0	0	0	0	0	0
0	0	0	0	0	1146	0	5.79726	0	0	0	0	0	0	0	1	0	0	0	0	0	0	0	0
0	0	0	0	0	1487	0	3.96986	0	0	0	0	0	0	0	1	0	0	0	0	0	0	0	0
0	0	0	0	0	4491	0	0.882192	0	0	0	0	0	0	0	0.882192	0	0	0	0	0	0	0	0
0	0	0	0	0	2696	0	4.99452	0	0	0	0	0	0	0	1	0	0	0	0	0	0	0	0
0	0	0	0	0	5853	0	3.94247	0	0	0	0	0	0	0	1	0	0	0	0	0	0	0	0
0	0	0	0	0	3946	0	2.98904	0	0	0	0	14.375	1	0	1	0	0	0	0	0	0	0	0
0	0	0	0	0	2538	0	2.99726	0	0	0	0	15	1	0	1	0	0	0	0	0	0	0	0
0	0	0	0	0	4167	0	0.671233	0	0	0	0	0	0	0	0.671233	0	0	0	0	0	0	0	0
0	0	0	0	0	4791	0	1.95616	0	0	0	0	0	0	0	1	0	0	0	0	0	0	0	0
0	0	0	0	0	3075	0	0.983562	0	0	0	0	0	0	0	0.983562	0	0	0	0	0	0	0	0
0	0	0	0	0	2541	0	3.17808	0	0	0	0	0	0	0	1	0	0	0	0	0	0	0	0
0	0	0	0	0	3581	0	2.69041	0	0	0	0	0	0	0	1	0	0	0	0	0	0	0	0
0	0	0	0	0	4107	0	4.18082	0	0	0	0	0	0	0	1	0	0	0	0	0	0	0	0
0	0	0	0	0	2427	0	1.93699	0	0	0	0	0	0	0	1	0	0	0	0	0	0	0	0
0	0	0	0	0	5957	0	3.94795	0	0	0	0	0	0	0	1	0	0	0	0	0	0	0	0
0	0	0	0	0	5678	0	0.923288	0	0	0	0	0	0	0	0.923288	0	0	0	0	0	0	0	0
0	0	0	0	0	4456	0	0.778082	0	0	0	0	0	0	0	0.778082	0	0	0	0	0	0	0	0
0	0	0	0	0	1119	0	3.91507	0	0	0	0	14.1176	1	0	1	0	0	0	0	0	0	0	0
0	0	0	0	0	825	0	2.7863	0	0	0	0	0	0	0	1	0	0	0	0	0	0	0	0
0	0	0	0	0	3130	0	5.93425	0	0	0	0	15	1	0	1	0	0	0	0	0	0	0	0
0	0	0	0	0	5092	0	1.66027	0	0	0	0	0	0	0	1	0	0	0	0	0	0	0	0
0	0	0	0	0	1119	0	3.95616	0	0	0	0	0	0	0	1	0	0	0	0	0	0	0	0
0	0	0	0	0	1307	0	4.74247	0	0	0	0	0	0	0	1	0	0	0	0	0	0	0	0
0	0	0	0	0	1285	0	0.947945	0	0	0	0	0	0	0	0.947945	0	0	0	0	0	0	0	0
0	0	0	0	0	6361	0	1.73151	0	0	0	0	0	0	0	1	0	0	0	0	0	0	0	0
0	0	0	0	0	4148	0	5.98904	0	0	0	0	15	1	0	1	0	0	0	0	0	0	0	0
0	0	0	0	0	3363	0	2.63562	0	0	0	0	0	0	0	1	0	0	0	0	0	0	0	0
0	0	0	0	0	1146	0	5.47945	0	0	0	0	0	0	0	1	0	0	0	0	0	0	0	0
0	0	0	0	0	786	0	2.23562	0	0	0	0	11.25	1	0	1	0	0	0	0	0	0	0	0
0	0	0	0	0	3487	0	1.87671	0	0	0	0	0	0	0	1	0	0	0	0	0	0	0	0
0	0	0	0	0	1445	0	1.99452	0	0	0	0	2.14286	1	0	1	0	0	0	0	0	0	0	0
0	0	0	0	0	1962	0	5.93973	0	0	0	0	15	1	0	1	0	0	0	0	0	0	0	0
0	0	0	0	0	4293	0	2.74795	0	0	0	0	0	0	0	1	0	0	0	0	0	0	0	0
0	0	0	0	0	6475	0	0.832877	0	0	0	0	0	0	0	0.832877	0	0	0	0	0	0	0	0
0	0	0	0	0	1780	0	3.99452	0	0	0	0	5	1	0	1	0	0	0	0	0	0	0	0
0	0	0	0	0	2911	0	4.96712	0	0	0	0	0	0	0	1	0	0	0	0	0	0	0	0
0	0	0	0	0	3273	0	2.99726	0	0	0	0	20	1	0	1	0	0	0	0	0	0	0	0
0	0	0	0	0	780	0	3.93973	0	0	0	0	0	0	0	1	0	0	0	0	0	0	0	0
0	0	0	0	0	4256	0	4.9863	0	0	0	0	0	0	0	1	0	0	0	0	0	0	0	0
0	0	0	0	0	4515	0	5.78356	0	0	0	0	0	0	0	1	0	0	0	0	0	0	0	0
0	0	0	0	0	6425	0	1.99452	0	0	0	0	20	1	0	1	0	0	0	0	0	0	0	0
0	0	0	0	0	6430	0	4.91781	0	0	0	0	22.5	1	0	1	0	0	0	0	0	0	0	0
0	0	0	0	0	2670	0	5.99726	0	0	0	0	55	1	0	1	0	0	0	0	0	0	0	0
0	0	0	0	0	3762	0	5.11507	0	0	0	0	0	0	0	1	0	0	0	0	0	0	0	0
0	0	0	0	0	2423	0	0.909589	0	0	0	0	0	0	0	0.909589	0	0	0	0	0	0	0	0
0	0	0	0	0	3265	0	5.9589	0	0	0	0	21.6667	1	0	1	0	0	0	0	0	0	0	0
0	0	0	0	0	3739	0	4.70685	0	0	0	0	3.63636	1	0	1	0	0	0	0	0	0	0	0
0	0	0	0	0	818	0	3.97534	0	0	0	0	0	0	0	1	0	0	0	0	0	0	0	0
0	0	0	0	0	5827	0	3.30411	0	0	0	0	0	0	0	1	0	0	0	0	0	0	0	0
0	0	0	0	0	4545	0	5.91507	0	0	0	0	0	0	0	1	0	0	0	0	0	0	0	0
0	0	0	0	0	6541	0	1.94795	0	0	0	0	0	0	0	1	0	0	0	0	0	0	0	0
0	0	0	0	0	4899	0	4.15342	0	0	0	0	15	1	0	1	0	0	0	0	0	0	0	0
0	0	0	0	0	309	0	1.8411	0	0	0	0	0	0	0	1	0	0	0	0	0	0	0	0
0	0	0	0	0	3586	0	1.94795	0	0	0	0	0	0	0	1	0	0	0	0	0	0	0	0
0	0	0	0	0	2573	0	1.89863	0	0	0	0	0	0	0	1	0	0	0	0	0	0	0	0
0	0	0	0	0	2302	0	2.99726	0	0	0	0	0	0	0	1	0	0	0	0	0	0	0	0
0	0	0	0	0	3410	0	4.05205	0	0	0	0	0	0	0	1	0	0	0	0	0	0	0	0
0	0	0	0	0	4425	0	5.97808	0	0	0	0	0	0	0	1	0	0	0	0	0	0	0	0
0	0	0	0	0	3835	0	3.85479	0	0	0	0	54.7917	1	0	1	0	0	0	0	0	0	0	0
0	0	0	0	0	1210	0	4.95616	0	0	0	0	0	0	0	1	0	0	0	0	0	0	0	0
0	0	0	0	0	1049	0	3.04932	0	0	0	0	0	0	0	1	0	0	0	0	0	0	0	0
0	0	0	0	0	4811	0	4.9589	0	0	0	0	0	0	0	1	0	0	0	0	0	0	0	0
0	0	0	0	0	1460	0	1.53151	0	0	0	0	0	0	0	1	0	0	0	0	0	0	0	0
0	0	0	0	0	1971	0	4.96712	0	0	0	0	0	0	0	1	0	0	0	0	0	0	0	0
0	0	0	0	0	3045	0	1.56164	0	0	0	0	0	0	0	1	0	0	0	0	0	0	0	0
0	0	0	0	0	3874	0	1.3589	0	0	0	0	0	0	0	1	0	0	0	0	0	0	0	0
0	0	0	0	0	3306	0	3.89041	0	0	0	0	0	0	0	1	0	0	0	0	0	0	0	0
0	0	0	0	0	6099	0	3.63014	0	0	0	0	0	0	0	1	0	0	0	0	0	0	0	0
0	0	0	0	0	495	0	5.93973	0	0	0	0	0	0	0	1	0	0	0	0	0	0	0	0
0	0	0	0	0	1651	0	5.9863	0	0	0	0	0	0	0	1	0	0	0	0	0	0	0	0
0	0	0	0	0	5483	0	1.70411	0	0	0	0	0	0	0	1	0	0	0	0	0	0	0	0
0	0	0	0	0	636	0	2.9863	0	0	0	0	10.7143	1	0	1	0	0	0	0	0	0	0	0
0	0	0	0	0	3544	0	4.95342	0	0	0	0	0	0	0	1	0	0	0	0	0	0	0	0
0	0	0	0	0	3414	0	4.4	0	0	0	0	0	0	0	1	0	0	0	0	0	0	0	0
0	0	0	0	0	6532	0	0.947945	0	0	0	0	0	0	0	0.947945	0	0	0	0	0	0	0	0
0	0	0	0	0	346	0	4.80274	0	0	0	0	0	0	0	1	0	0	0	0	0	0	0	0
0	0	0	0	0	5005	0	2.89589	0	0	0	0	0	0	0	1	0	0	0	0	0	0	0	0
0	0	0	0	0	5292	0	2.03014	0	0	0	0	0	0	0	1	0	0	0	0	0	0	0	0
0	0	0	0	0	2225	0	2.97808	0	0	0	0	0	0	0	1	0	0	0	0	0	0	0	0
0	0	0	0	0	403	0	3.97808	0	0	0	0	17.5	1	0	1	0	0	0	0	0	0	0	0
0	0	0	0	0	1849	0	4.94521	0	0	0	0	0	0	0	1	0	0	0	0	0	0	0	0
0	0	0	0	0	6446	0	2.37534	0	0	0	0	0	0	0	1	0	0	0	0	0	0	0	0
0	0	0	0	0	4443	0	0.320548	0	0	0	0	0	0	0	0.320548	0	0	0	0	0	0	0	0
0	0	0	0	0	1878	0	6	0	0	0	0	10	1	0	1	0	0	0	0	0	0	0	0
[truncated: 102,865 more rows]
